# Supplementary material for: The importance of choosing appropriate methods for assessing wild food plant knowledge and use: A case study among the Baka in Cameroon
Source: PubMed Central journal article supplement (PMC7891729; doi:10.1371/journal.pone.0247108), 2021-02-18
Supplement: pone.0247108.s004.pdf [file pone.0247108.s004.pdf]

# PLOS ONE

## The importance of choosing appropriate methods for assessing wild food plant knowledge and use: a case study among the Baka in Cameroon.

--Manuscript Draft--

|                               |                                                                                                                                                                                                                                                                                                                                                                                                                                                                                                                                                                                                                                                                                                                                                                                                                                                                                                                                                                                                                                                                                                                                                                                                                                                                                                                                                                                                                                                                                                                                                                                                                                                                                                                                                                                                                                                                                                                                                                                                                                                                                     |
|-------------------------------|-------------------------------------------------------------------------------------------------------------------------------------------------------------------------------------------------------------------------------------------------------------------------------------------------------------------------------------------------------------------------------------------------------------------------------------------------------------------------------------------------------------------------------------------------------------------------------------------------------------------------------------------------------------------------------------------------------------------------------------------------------------------------------------------------------------------------------------------------------------------------------------------------------------------------------------------------------------------------------------------------------------------------------------------------------------------------------------------------------------------------------------------------------------------------------------------------------------------------------------------------------------------------------------------------------------------------------------------------------------------------------------------------------------------------------------------------------------------------------------------------------------------------------------------------------------------------------------------------------------------------------------------------------------------------------------------------------------------------------------------------------------------------------------------------------------------------------------------------------------------------------------------------------------------------------------------------------------------------------------------------------------------------------------------------------------------------------------|
| <b>Manuscript Number:</b>     | PONE-D-20-37238R1                                                                                                                                                                                                                                                                                                                                                                                                                                                                                                                                                                                                                                                                                                                                                                                                                                                                                                                                                                                                                                                                                                                                                                                                                                                                                                                                                                                                                                                                                                                                                                                                                                                                                                                                                                                                                                                                                                                                                                                                                                                                   |
| <b>Article Type:</b>          | Research Article                                                                                                                                                                                                                                                                                                                                                                                                                                                                                                                                                                                                                                                                                                                                                                                                                                                                                                                                                                                                                                                                                                                                                                                                                                                                                                                                                                                                                                                                                                                                                                                                                                                                                                                                                                                                                                                                                                                                                                                                                                                                    |
| <b>Full Title:</b>            | The importance of choosing appropriate methods for assessing wild food plant knowledge and use: a case study among the Baka in Cameroon.                                                                                                                                                                                                                                                                                                                                                                                                                                                                                                                                                                                                                                                                                                                                                                                                                                                                                                                                                                                                                                                                                                                                                                                                                                                                                                                                                                                                                                                                                                                                                                                                                                                                                                                                                                                                                                                                                                                                            |
| <b>Short Title:</b>           | Choosing appropriate methods for assessing wild food plant knowledge.                                                                                                                                                                                                                                                                                                                                                                                                                                                                                                                                                                                                                                                                                                                                                                                                                                                                                                                                                                                                                                                                                                                                                                                                                                                                                                                                                                                                                                                                                                                                                                                                                                                                                                                                                                                                                                                                                                                                                                                                               |
| <b>Corresponding Author:</b>  | Sandrine Gallois<br>Leiden University: Universiteit Leiden<br>Leiden, NETHERLANDS                                                                                                                                                                                                                                                                                                                                                                                                                                                                                                                                                                                                                                                                                                                                                                                                                                                                                                                                                                                                                                                                                                                                                                                                                                                                                                                                                                                                                                                                                                                                                                                                                                                                                                                                                                                                                                                                                                                                                                                                   |
| <b>Keywords:</b>              | Ethnobotany, Hunter-gatherers, Freelisting, Dietary Recall, Walk-in-the-woods, Wild food plants.                                                                                                                                                                                                                                                                                                                                                                                                                                                                                                                                                                                                                                                                                                                                                                                                                                                                                                                                                                                                                                                                                                                                                                                                                                                                                                                                                                                                                                                                                                                                                                                                                                                                                                                                                                                                                                                                                                                                                                                    |
| <b>Abstract:</b>              | <p>In tropical rainforests, access to and availability of natural resources are vital for the dietary diversity and food security of forest-dwelling societies. In the Congo Basin, these are challenged by the increasing exploitation of forests for bushmeat, commercial hardwood, mining, and large-scale agriculture. In this context, a balanced approach is needed between the pressures from forest exploitation, non-timber forest product trade and the livelihood and dietary behavior of rural communities. While there is a general positive association between tree cover and dietary diversity, the complex biocultural interactions between tropical forest food resources and the communities they sustain are still understudied. This research focuses on the knowledge and use of wild food plants by the forest-dwelling Baka people in southeast Cameroon. By using two different sets of methods, namely ex-situ interviews and in-situ surveys, we collected ethnographic and ethnobotanical data in two Baka settlements and explored the diversity of wild edible plants known, the frequency of their consumption, and potential conflicts between local diet and commercial trade in forest resources. Within a single Baka population, we showed that the in-situ walk-in-the-woods method resulted in more detailed information on wild food plant knowledge and use frequency than the ex-situ methods of freelisting and dietary recalls. Our in-situ method yielded 91 wild edible species, much more than the ex-situ freelisting interviews (38 spp.) and dietary recalls (12 spp.). Our results suggest that studies that are based only on ex-situ interviews may underestimate the importance of wild food plants for local communities. We discuss the limitations and strengths of these different methods for capturing the diversity of wild food plant knowledge and uses and propose that future studies on wild food plant knowledge and use frequency should rely on a mixed approach that combines in-situ and ex-situ methods.</p> |
| <b>Order of Authors:</b>      | Sandrine Gallois<br>Thomas Heger<br>Amanda Georganna Henry<br>Tinde van Andel                                                                                                                                                                                                                                                                                                                                                                                                                                                                                                                                                                                                                                                                                                                                                                                                                                                                                                                                                                                                                                                                                                                                                                                                                                                                                                                                                                                                                                                                                                                                                                                                                                                                                                                                                                                                                                                                                                                                                                                                       |
| <b>Response to Reviewers:</b> | <p>Anna Fodor<br/>Leiden, 6 January, 2021<br/>Academic Editor<br/>PLOS ONE</p> <p>Dear Dr. Fodor,<br/>Thank you for allowing us to adapt our manuscript PONE-D-20-37238, entitled "The importance of choosing appropriate methods for assessing wild food plant knowledge and use: a case study among the Baka in Cameroon". We have followed your suggestions and hope that the manuscript now fits the submission standards of PLoS ONE.</p> <p>We have submitted a revised version of our manuscript labeled as "revised manuscript with track changes" and a clean copy (unmarked) labeled as "manuscript", as well as the response to the Editor's comments, Dr Muhammad Ishtiaq, in the document</p>                                                                                                                                                                                                                                                                                                                                                                                                                                                                                                                                                                                                                                                                                                                                                                                                                                                                                                                                                                                                                                                                                                                                                                                                                                                                                                                                                                          |

|                                                                                                                                |                                                                                                                                                                                                                                                                                                                                                                                                                                                                                                                                                                                                                                                                                                                                                                                                                                                                                                                                                                                                                                                                                                                                                                                                                                                                                                                                                                                                                                                                                                                                                                                                                                                                                                                                                                                                                                                                                                                                                                                                                                                                                                                                                                                                                                                                                                                                                                                                                                                                                                                                                                                                                                                                                                                                                                                                                                                                                                                                                                                                                                                                                                                                                                                                                                      |
|--------------------------------------------------------------------------------------------------------------------------------|--------------------------------------------------------------------------------------------------------------------------------------------------------------------------------------------------------------------------------------------------------------------------------------------------------------------------------------------------------------------------------------------------------------------------------------------------------------------------------------------------------------------------------------------------------------------------------------------------------------------------------------------------------------------------------------------------------------------------------------------------------------------------------------------------------------------------------------------------------------------------------------------------------------------------------------------------------------------------------------------------------------------------------------------------------------------------------------------------------------------------------------------------------------------------------------------------------------------------------------------------------------------------------------------------------------------------------------------------------------------------------------------------------------------------------------------------------------------------------------------------------------------------------------------------------------------------------------------------------------------------------------------------------------------------------------------------------------------------------------------------------------------------------------------------------------------------------------------------------------------------------------------------------------------------------------------------------------------------------------------------------------------------------------------------------------------------------------------------------------------------------------------------------------------------------------------------------------------------------------------------------------------------------------------------------------------------------------------------------------------------------------------------------------------------------------------------------------------------------------------------------------------------------------------------------------------------------------------------------------------------------------------------------------------------------------------------------------------------------------------------------------------------------------------------------------------------------------------------------------------------------------------------------------------------------------------------------------------------------------------------------------------------------------------------------------------------------------------------------------------------------------------------------------------------------------------------------------------------------------|
|                                                                                                                                | <p>"Response to Reviewer" with a point by point answers.</p> <p>Below, we list each point made by the academic editor, and our respective answer.<br/>Additional Editor Comments:</p> <p>Paper needs followings changes/improvements and data provisions; in order to proceed it for further.</p> <p>(1) needs to improve English language, there are many mistakes in the article.(letter of English experts reviewed as supporting needed.<br/>Answer to comment #1: Our manuscript was checked by someone with ample experience in publishing scientific articles in the English language.</p> <p>(2) Letter of Ethical and ISE and other institution permission letters are required.<br/>Answer to comment #2: The International Society for Ethnobiology does not issue permission letters and does not have an ethnical board: it just published standards for researchers, to which we adhered. However, our research was carried out within the ERC project "HARVEST: Plant Foods in Human Evolution; Factors affecting the harvest of nutrients from the floral environment". For this research project, our co-author Amanda Henry received approval from the Ethical Board of the Faculty of Medicine of the University of Leipzig, Germany. We have added this letter to our submitted files and listed the HARVEST project in the funding. Moreover, before we started our fieldwork, we received permission from the National Committee of Ethics for the Research of Human Health (CNERSH) of the Cameroonian government. We also added this letter to the submitted files.</p> <p>(3) The references cited in text and reference section needs to be rechecked as it has many mistakes in it.<br/>Answer to comment #3: We have checked all references in the text and reference list and adapted them to the style of PLoS ONE.</p> <p>(4) Figure of study area needed.<br/>Answer to comment #4: We included a map of the study area (Figure 1)</p> <p>(5) Model of questionnaire needed.<br/>Answer to comment #5: We included the model of our questionnaire in our Supporting Information (Supplementary file 1).</p> <p>(6) Families names are not correct, recheck and resend table 1.<br/>Answer to comment #6: Family and author names of the species are now listed in the Supporting Information (Supplementary Table 1). All scientific names were checked and updated suing Plants of the World Online.</p> <p>(7) Provide ubiquitous herbarium numbers for all plants collected. it has two types of numbering.<br/>Answer to comment #7: Herbarium numbers for all plants collected are listed in Supplementary Table 1, but there are two acronyms (WTH and SG), referring to the two main collectors: Willem Thomas Heger and Sandrine Gallois. We had to follow the Naturalis guidelines of specimen collection for this study.</p> <p>(8) Figures are dim/blurred, send high density/good quality figures.<br/>Answer to comment #8: We have now uploaded high quality figures following the guidelines of PLoS ONE.<br/>On behalf of our co-authors, we hope that our manuscript is now suitable to be considered for review,<br/>Yours sincerely,<br/>Sandrine Gallois and Tinde van Andel</p> |
| <b>Additional Information:</b>                                                                                                 |                                                                                                                                                                                                                                                                                                                                                                                                                                                                                                                                                                                                                                                                                                                                                                                                                                                                                                                                                                                                                                                                                                                                                                                                                                                                                                                                                                                                                                                                                                                                                                                                                                                                                                                                                                                                                                                                                                                                                                                                                                                                                                                                                                                                                                                                                                                                                                                                                                                                                                                                                                                                                                                                                                                                                                                                                                                                                                                                                                                                                                                                                                                                                                                                                                      |
| <b>Question</b>                                                                                                                | <b>Response</b>                                                                                                                                                                                                                                                                                                                                                                                                                                                                                                                                                                                                                                                                                                                                                                                                                                                                                                                                                                                                                                                                                                                                                                                                                                                                                                                                                                                                                                                                                                                                                                                                                                                                                                                                                                                                                                                                                                                                                                                                                                                                                                                                                                                                                                                                                                                                                                                                                                                                                                                                                                                                                                                                                                                                                                                                                                                                                                                                                                                                                                                                                                                                                                                                                      |
| <p><b>Financial Disclosure</b></p> <p>Enter a financial disclosure statement that describes the sources of funding for the</p> | <p>This research has received funding from the European Research Council under the European Union's Horizon 2020 research and innovation program; grant agreement number STG-677576 ("HARVEST") awarded to AGH. The botanical fieldwork was funded by Naturalis Biodiversity Center (<a href="https://www.naturalis.nl/en">https://www.naturalis.nl/en</a>) to TVA, the</p>                                                                                                                                                                                                                                                                                                                                                                                                                                                                                                                                                                                                                                                                                                                                                                                                                                                                                                                                                                                                                                                                                                                                                                                                                                                                                                                                                                                                                                                                                                                                                                                                                                                                                                                                                                                                                                                                                                                                                                                                                                                                                                                                                                                                                                                                                                                                                                                                                                                                                                                                                                                                                                                                                                                                                                                                                                                          |

work included in this submission. Review the [submission guidelines](#) for detailed requirements. View published research articles from [PLOS ONE](#) for specific examples.

This statement is required for submission and **will appear in the published article** if the submission is accepted. Please make sure it is accurate.

#### Unfunded studies

Enter: *The author(s) received no specific funding for this work.*

#### Funded studies

Enter a statement with the following details:

- Initials of the authors who received each award
- Grant numbers awarded to each author
- The full name of each funder
- URL of each funder website
- Did the sponsors or funders play any role in the study design, data collection and analysis, decision to publish, or preparation of the manuscript?
- **NO** - Include this sentence at the end of your statement: *The funders had no role in study design, data collection and analysis, decision to publish, or preparation of the manuscript.*
- **YES** - Specify the role(s) played.

\* typeset

TreubMaatschappij and the Alberta Mennega Stichting (<https://www.alberta-mennega-stichting.nl>) to TH. None of the funders has played a role in the research design, data collection, analysis, decision to publish or preparation of the manuscript.

#### Competing Interests

Use the instructions below to enter a competing interest statement for this submission. On behalf of all authors, disclose any [competing interests](#) that could be perceived to bias this work—acknowledging all financial support and any other relevant financial or non-financial competing interests.

This statement **will appear in the published article** if the submission is accepted. Please make sure it is accurate. View published research articles from [PLOS ONE](#) for specific examples.

The authors have declared that no competing interests exist.

**NO authors have competing interests**

Enter: *The authors have declared that no competing interests exist.*

**Authors with competing interests**

Enter competing interest details beginning with this statement:

*I have read the journal's policy and the authors of this manuscript have the following competing interests: [insert competing interests here]*

\* typeset

**Ethics Statement**

Enter an ethics statement for this submission. This statement is required if the study involved:

- Human participants
- Human specimens or tissue
- Vertebrate animals or cephalopods
- Vertebrate embryos or tissues
- Field research

Write "N/A" if the submission does not require an ethics statement.

General guidance is provided below. Consult the [submission guidelines](#) for detailed instructions. **Make sure that all information entered here is included in the Methods section of the manuscript.**

This research was carried out within the ERC project "HARVEST: Plant Foods in Human Evolution; Factors affecting the harvest of nutrients from the floral environment". For this research project, Amanda G. Henry received approval from the Ethical Commission of the Faculty of Medicine of the University of Leipzig, Germany (196-16/ek). Moreover, before we started our fieldwork, we received permission from the Ethical Committee from the Ministry of Health of Cameroon (n°2018/06/1049/CE/CNERSH/SP). This study also adheres to the Code of Ethics of the International Society of Ethnobiology (2006), and the authors received oral and written Free Prior Informed Consent from all the participants before beginning data collection.

**Format for specific study types**

**Human Subject Research (involving human participants and/or tissue)**

- Give the name of the institutional review board or ethics committee that approved the study
- Include the approval number and/or a statement indicating approval of this research
- Indicate the form of consent obtained (written/oral) or the reason that consent was not obtained (e.g. the data were analyzed anonymously)

**Animal Research (involving vertebrate animals, embryos or tissues)**

- Provide the name of the Institutional Animal Care and Use Committee (IACUC) or other relevant ethics board that reviewed the study protocol, and indicate whether they approved this research or granted a formal waiver of ethical approval
- Include an approval number if one was obtained
- If the study involved *non-human primates*, add *additional details* about animal welfare and steps taken to ameliorate suffering
- If anesthesia, euthanasia, or any kind of animal sacrifice is part of the study, include briefly which substances and/or methods were applied

**Field Research**

Include the following details if this study involves the collection of plant, animal, or other materials from a natural setting:

- Field permit number
- Name of the institution or relevant body that granted permission

**Data Availability**

Authors are required to make all data underlying the findings described fully available, without restriction, and from the time of publication. PLOS allows rare exceptions to address legal and ethical concerns. See the [PLOS Data Policy](#) and [FAQ](#) for detailed information.

Yes - all data are fully available without restriction

A Data Availability Statement describing where the data can be found is required at submission. Your answers to this question constitute the Data Availability Statement and **will be published in the article**, if accepted.

**Important:** Stating 'data available on request from the author' is not sufficient. If your data are only available upon request, select 'No' for the first question and explain your exceptional situation in the text box.

Do the authors confirm that all data underlying the findings described in their manuscript are fully available without restriction?

**Describe where the data may be found in full sentences. If you are copying our sample text, replace any instances of XXX with the appropriate details.**

- If the data are **held or will be held in a public repository**, include URLs, accession numbers or DOIs. If this information will only be available after acceptance, indicate this by ticking the box below. For example: *All XXX files are available from the XXX database (accession number(s) XXX, XXX).*
- If the data are all contained **within the manuscript and/or Supporting Information files**, enter the following:  
*All relevant data are within the manuscript and its Supporting Information files.*
- If neither of these applies but you are able to provide **details of access elsewhere**, with or without limitations, please do so. For example:

*Data cannot be shared publicly because of [XXX]. Data are available from the XXX Institutional Data Access / Ethics Committee (contact via XXX) for researchers who meet the criteria for access to confidential data.*

*The data underlying the results presented in the study are available from (include the name of the third party*

All relevant data are within the manuscript and its Supporting Information files (Supplementary Table 1).

|                                                                                                                                                                                                                                         |                                                                                                                                                                                  |
|-----------------------------------------------------------------------------------------------------------------------------------------------------------------------------------------------------------------------------------------|----------------------------------------------------------------------------------------------------------------------------------------------------------------------------------|
| <p><i>and contact information or URL).</i></p> <ul style="list-style-type: none"><li>• This text is appropriate if the data are owned by a third party and authors do not have permission to share the data.</li></ul> <p>* typeset</p> |                                                                                                                                                                                  |
| Additional data availability information:                                                                                                                                                                                               | Tick here if the URLs/accession numbers/DOIs will be available only after acceptance of the manuscript for publication so that we can ensure their inclusion before publication. |

1 **The importance of choosing appropriate methods for**  
2 **assessing wild food plant knowledge and use: a case study**  
3 **among the Baka in Cameroon.**

4

5 **Short title:** Choosing appropriate methods for assessing wild food plant knowledge.

6

7 Sandrine Gallois<sup>1\*</sup>, Thomas Heger<sup>2</sup>, Amanda G. Henry<sup>1</sup>, and Tinde van Andel<sup>2,3</sup>

8

9 <sup>1</sup>Faculty of Archaeology, Leiden University, Leiden, the Netherlands

10 <sup>2</sup>Biosystematics Group, Wageningen University, Wageningen, the Netherlands

11 <sup>3</sup>Naturalis Biodiversity Center, Leiden, the Netherlands

12

13 \*Corresponding Author: Sandrine Gallois

14 Faculty of Archaeology, Leiden University, Leiden, the Netherlands

15

16 Email: galloissandrine.ethnoeco@gmail.com

17



## 18 **Abstract**

19 In tropical rainforests, access to and availability of natural resources are vital for the dietary  
20 diversity and food security of forest-dwelling societies. In the Congo Basin, these are challenged  
21 by the increasing exploitation of forests for bushmeat, commercial hardwood, mining, and large-  
22 scale agriculture. In this context, a balanced approach is needed between the pressures from  
23 forest exploitation, non-timber forest product trade and the livelihood and dietary behavior of  
24 rural communities. While there is a general positive association between tree cover and dietary  
25 diversity, the complex biocultural interactions between tropical forest food resources and the  
26 communities they sustain are still understudied. This research focuses on the knowledge and use  
27 of wild food plants by the forest-dwelling Baka people in southeast Cameroon. By using two  
28 different sets of methods, namely *ex-situ* interviews and *in-situ* surveys, we collected  
29 ethnographic and ethnobotanical data in two Baka settlements and explored the diversity of wild  
30 edible plants known, the frequency of their consumption, and potential conflicts between local  
31 diet and commercial trade in forest resources. Within a single Baka population, we showed that  
32 the *in-situ* walk-in-the-woods method resulted in more detailed information on wild food plant  
33 knowledge and use frequency than the *ex-situ* methods of freelisting and dietary recalls. Our *in-*  
34 *situ* method yielded 91 wild edible species, much more than the *ex-situ* freelisting interviews (38  
35 spp.) and dietary recalls (12 spp.). Our results suggest that studies that are based only on *ex-situ*  
36 interviews may underestimate the importance of wild food plants for local communities. We  
37 discuss the limitations and strengths of these different methods for capturing the diversity of wild  
38 food plant knowledge and uses and propose that future studies on wild food plant knowledge and  
39 use frequency should rely on a mixed approach that combines *in-situ* and *ex-situ* methods.

40

## 41 **Introduction**

42 In tropical rainforests, access to and availability of natural resources are vital for the dietary  
43 diversity and food security of forest-dwelling societies. The Congo Basin includes the largest  
44 tract of tropical rainforest in Africa. This highly biodiverse region is inhabited by more than 30  
45 million people, including forest-dwelling communities that strongly depend on their natural  
46 environment for their survival [1]. A wide variety of wild edible plant species (WEP) has been  
47 reported for the Congo Basin, among Bantu-speaking farmers and especially among hunter-  
48 gatherers that infrequently practice agriculture [2-6]. Local people harvest these wild food plants  
49 mainly for subsistence use within the household, but a substantial number of species is locally  
50 traded, and a few find their way to global markets [7, 8]. The cash income earned with the trade  
51 in non-timber forest products (NTFPs), important for improving livelihoods, can empower local  
52 communities [9]. Wild edible plants also provide a safety net in times of agricultural shortage  
53 and are thus essential for food security [9]. However, forest-dwelling societies in the Congo  
54 Basin are challenged by a decrease in access to and availability of wild food resources due to the  
55 increasing exploitation of the forests for commercial hardwood, precious minerals, and space for  
56 oil palm and rubber plantations [10, 11]. As a result of large-scale agricultural encroachment,  
57 logging, mining and hunting activities, the ecosystems of this region are under severe pressure  
58 [10, 12]. A recent survey estimated that just 70% of the standing forests of the Congo Basin  
59 remain fully intact [11]. Pressures on local resources have led to a decrease in local people's  
60 access to the important wild plants and bushmeat, which contributes substantially to their diet  
61 and medicine [13, 14]. In Cameroon, for example, more than 60% of the top 23 timber species  
62 exported from the country also yield important NTFPs for local people. A balanced approach is  
63 needed between tropical hardwood exploitation and the livelihoods of rural communities, for

64 which the development and implementation of sustainable forest management plans are essential  
65 [9].

66  
67 Although the value of local ecological knowledge for informing conservation and environmental  
68 management is well established [15-17] and there is a general positive association between tree  
69 cover and dietary diversity [18], the complex biocultural interactions between tropical forest  
70 food resources and the communities they sustain are still understudied [10, 19]. According to  
71 Ngome et al. [20], in most poor communities in the Congo Basin, the wide variety of nutrient-  
72 rich, wild edible plants are underutilized, either due to ignorance, shame or misconceptions about  
73 these foods. Ethnobotanical studies have so far insufficiently provided evidence for the intake,  
74 quality and nutritional impacts of WEPs, their contribution to the overall diet and their role in  
75 ensuring food security [20]. Considering the increasing conflicts of interests regarding the use of  
76 wild resources, accurate assessments of local uses and dependency on wild plants and animals  
77 are necessary to evaluate the effects of commercial forest exploitation on both biodiversity and  
78 local livelihoods. The aim of this research was to explore the diversity of wild edible plants  
79 known and used by the forest-dwelling Baka people in southeast Cameroon. We also evaluated  
80 the frequency of their consumption, potential conflicts between local diet and commercial trade  
81 in forest resources, and the different field methods to assess of WEP knowledge and  
82 consumption.

83  
84 The Baka are Ubangian-speaking forager-horticulturalists, formerly referred to as ‘Pygmies’  
85 [21]. Until roughly 50 years ago, they were nomadic foragers who relied on hunting, fishing,  
86 gathering, and the exchange of NTFPs for agricultural crops with their neighbors, Bantu-

87 speaking farmers [22]. Since the 1960s, the Baka have been facing several changes in their  
88 livelihood. Due to missionary activities and a government program of sedentarization, they have  
89 progressively left their forest camps and settled in villages along logging roads [23]. Nowadays,  
90 Baka livelihood is mostly based on the combination of foraging activities, agricultural work in  
91 their own fields and wage labor on Bantu farms or for logging companies [22]. The settlement  
92 programs, which included displacement from protected areas and forced sedentarization, have  
93 had drastic effects on Baka livelihood and wellbeing. Increased alcohol abuse, the loss of  
94 traditional knowledge, and an increasing destabilization of their natural environment have led to  
95 the marginalization of the Baka and their increased dependence on other ethnic groups [24, 25].  
96 To evaluate the Baka's reliance on their surrounding forests in the current situation, it is essential  
97 to assess not only their knowledge on wild food plants, but also their actual use and  
98 commercialization of these species.

99

100 Local knowledge and use of plants are assessed through different ethnobotanical methods, of  
101 which the interview is the most widely used. Interview methods vary considerably between  
102 studies and are deployed based on the research question addressed [26]. Freelisting is a  
103 frequently used interview method, in which informants are asked to list all items they know  
104 within a given domain [27, 28]. This technique reveals cultural salience and variations in  
105 individuals' topical knowledge [29], and results in a shortlist of highly valued plants [30, 31]. As  
106 freelisting enables the collection of data from a large number of informants in a limited amount  
107 of time [32], this method is frequently used as a starting point for studying traditional plant  
108 knowledge. Local names of plants listed during the freelisting interviews are identified  
109 afterwards by collecting voucher specimens for these names. The resulting dataset is then used to

110 draw conclusions about plant knowledge of a certain group of people and/or the potential  
111 contribution of wild plants to their diet [30, 33]. Organizing field trips to collect herbarium  
112 specimens of species mentioned during freelisting exercises is often (inaccurately) called the  
113 ‘walk-in-the-woods method’ [34, 35]. However, this technique, first coined by Phillips and  
114 Gentry in 1993[36], implies that participants are encouraged to actively lead field trips and point  
115 out all useful plants they know and/or use [26], instead of only helping the researcher search for  
116 specimens that can be linked to the local names mentioned during interviews. Data elicited from  
117 freelisting appear to be specific to the context in which they were collected (e.g., in the village),  
118 creating an unintended but significant bias in this type of ethnobotanical research [27, 32, 37].  
119 Gathering the data during *ex-situ* interviews, for example in people’s home, away from the  
120 ecological context in which people collect their plants, may result in lists of only the most salient  
121 plant species. Furthermore, the success of freelisting depends on the informants’ correct  
122 understanding of the category or cultural domain (e.g., wild food plants) under discussion [28,  
123 29, 38].

124

125 In societies that undergo rapid socio-economic changes, people become more integrated into the  
126 market economy, change their lifestyle and adopt cultivated or processed substitutes for wild  
127 plants in their diet [39]. This creates a gap between people’s ethnobotanical knowledge and their  
128 actual use of plants [40, 41]. A discrepancy between the number of useful species known and  
129 those actually used indicates that elders who still know how plants were used in the past do not  
130 practice this any longer, and infrequently transfer their skills to the next generation [40].

131 Freelisting exercises often focus on people’s knowledge [40], while recall surveys, developed by  
132 social anthropologists for understanding time allocation [42], lead informants to enumerate what

133 they have done during a specific period of time. For instance, dietary recall surveys have been  
134 developed to estimate the proportion of different food items in people's diet [43]. Recently,  
135 dietary recalls were introduced in ethnobotanical studies to assess local uses of plants [44, 45],  
136 while income recall surveys have been used to assess the contribution of the sale of different  
137 forest products to local livelihoods [46]. Although many studies reported a high diversity of wild  
138 edible plant species worldwide [47, 48], research relying on dietary recalls has resulted in  
139 surprisingly low numbers of wild species actually being consumed [49, 50]. Dietary recalls  
140 carried out in the Democratic Republic of the Congo (DRC) also showed that wild plants did not  
141 contribute substantially to rural and urban women diets [51]. Likewise, the dietary recalls that we  
142 recently held among the Baka reported only 15 wild edible species [52], which is much less than  
143 the list provided recently in the northern Congo area [53] and in stark contrast to the extensive  
144 wild plant knowledge documented almost three decades earlier by anthropologists among the  
145 same ethnic group [2, 3]. Like freelisting, dietary recalls are limited by the subject's memory  
146 [54] and may therefore underreport plant use.

147

148 Whether the limited amount of WEP listed by the Baka was a result of a general loss of  
149 traditional plant knowledge, a change in food preferences or the effect of the assessment  
150 methods, was essential to contextualize our findings. In this study, we explored how different  
151 ethnobotanical methods captured the diversity of wild edible plant knowledge and use in a Baka  
152 community. We aimed to answer the following questions:

- 153 1) Which wild edible plants (WEP) are known and used by the Baka?
- 154 2) What are the most frequently consumed WEP species among the Baka?
- 155 3) Do commercial logging and NTFP trade affect the availability of wild food plants?

156 4) How do different methods for assessing WEP use vary in their results?

157

## 158 **Materials and Methods**

### 159 **Study site**

160 We collected data on wild food plants in two Baka settlements: Le Bosquet

161 (3°07'38''N13°52'57''E) and Kungu (3°02'40"N 14°06'57''E), Haut Nyong division,

162 southeastern Cameroon. The two settlements, which belong to the same population of Baka

163 hunter-gatherers, are both located at least eight hours by car from the capital Yaoundé, of which

164 four hours on unpaved logging roads (Fig 1). The accessibility of this area highly depends on the

165 weather, as the road quickly deteriorates during the rainy season. The area is covered by a

166 mixture of evergreen and moist semi-deciduous forest within altitudinal ranges of 300–600

167 meters [55]. In populated areas, the forest cover is largely removed in favor of settlements, cocoa

168 plantations, logging activities and small-scale agriculture. This creates a mosaic of dense primary

169 forest, selectively logged primary forest, secondary forest and agricultural fields, interspersed

170 with trails. The climate of the region is tropical humid, with a major rainy season between late-

171 August and late-November and a major dry season between late-November and mid-March. The

172 annual precipitation reaches about 1500 mm and the average temperature is 25°C [55].

173

### 174 **Fig 1. Map of the study area**

175

176 Before data collection, Free Prior and Informed Consent was obtained from all participants. This

177 study adheres to the Code of Ethics of the International Society of Ethnobiology [56], and

178 received approval from the ethics commission of Leipzig University (196-16/ek) and the Ethical

179 Committee from the Ministry of Health of Cameroon (n°2018/06/1049/CE/CNERSH/SP). For  
 180 our inventory of wild food plant knowledge, use and commercialization, we used a combination  
 181 of four different datasets, obtained from *ex-situ* interviews (freelisting, dietary recalls and income  
 182 recalls) and *in-situ* ethnobotanical forest surveys (‘walk-in-the-woods’ method). We collected  
 183 data in the two Baka settlements in 2018 and 2019, during three different fieldwork periods, to  
 184 cover variations in wild fruit availability (Table 1).

185

186 **Table 1. Datasets, fieldwork periods and the different methods used to assess wild food**  
 187 **plant knowledge, consumption and commercialization among the two Baka settlements.**

| Fieldwork period                                              | Feb.-March<br>2018  | Oct.-Nov.<br>2018     | April-May<br>2019   |                                      |
|---------------------------------------------------------------|---------------------|-----------------------|---------------------|--------------------------------------|
| Datasets and Methods<br>(number of participants)              | major dry<br>season | major rainy<br>season | minor dry<br>season | Data published<br>earlier by authors |
| 1. Freelisting(n=55)<br><i>ex-situ</i>                        | x                   |                       |                     | [52]                                 |
| 2. Dietary recalls (n=83)<br><i>ex-situ</i>                   | x                   | x                     | x                   | [52]                                 |
| 3. Income recalls (n=73)<br><i>ex-situ</i>                    | x                   | x                     |                     | [52]                                 |
| 4. Walk-in-the-woods survey<br>14 days (n= 20) <i>in-situ</i> |                     |                       | x                   | [71]*                                |

188 \* Only data regarding bush mangoes (Irvingiaceae).

189



## 190 **Data collection: *ex-situ* interviews**

191 All data were collected among Baka individuals of 18 years and older. We included all  
192 individuals who were present in the settlement and willing to participate. While we aimed to get  
193 a gender- and age-balanced sample, we did not exclude any potential participants. All *ex-situ*  
194 interviews were held in the French and Baka language by the first author with the assistance of a  
195 local research assistant-interpreter. During the 55 freelisting exercises, we asked 24 men and 31  
196 women in the two Baka villages (29 in Le Bosquet, 26 in Kungu, belonging to 51 different  
197 households) to report all WEPs they knew [52]. Because no specific term exists in Baka  
198 language that refers to ‘wild edible plant’, we asked them: “Which food from the forest,  
199 excluding game, honey and mushrooms, do you know?” (Supplementary File 1). To gather data  
200 on the actual consumption of wild food plants and their importance in Baka diet, we conducted a  
201 dietary recall protocol that we adapted from the FAO Guidelines for Assessing Dietary Diversity  
202 [52, 57]. Participants were asked to list all items they had consumed within the previous 24  
203 hours, and to mention the origin of each food item (from the wild, from agricultural fields or  
204 bought at the market). A total of 143 dietary recall interviews were conducted in the two  
205 settlements among 83 individuals: 35 men and 48 women (38 in Le Bosquet and 45 in Kungu),  
206 belonging to 66 different households; 42 individuals were interviewed once, 22 twice and 11  
207 three times (Supplementary File 1). A detailed account on the outcomes of the freelisting and  
208 dietary recalls with regard to cultivated and shop-bought food, preferences and perceptions of  
209 wild vs. cultivated food was published earlier [52].

210 To collect data on wild food plants that were commercialized (either traded as timber or as  
211 NTFP), we conducted a 14-day recall survey on the income received through sale, asking 73  
212 participants to list all the items they had sold during this time period [58]. A total of 114

213 interviews were conducted with 43 women and 30 men (34 individuals in Le Bosquet and 39 in  
214 Kungu): 32 individuals were interviewed once and 41 twice (Table 1). Part of the *ex-situ*  
215 interviews were repeated in other parts of the year to verify whether the consumption and/or  
216 commercialization of WEP changed according to the season. None of the three *ex-situ* interview  
217 methods were based on a predefined set of species. We did not use pictures of wild food plants,  
218 fresh samples or other visual stimuli, and neither gave prompts after informants had listed a  
219 certain number of plants.

220

### 221 **Data collection: *in-situ* walk-in-the-woods survey**

222 From the local (Baka) names mentioned during the three *ex-situ* interview methods, we  
223 constructed a preliminary database of ‘folk taxa’ of wild plants consumed by the Baka, with  
224 tentative scientific names retrieved from literature on Central African wild food plants [2, 3, 6,  
225 59] and earlier ethnographic and ethnoecological data collected between 2012 and 2014 by the  
226 first author during ca. 18 months of fieldwork in the Baka settlements [22]. During our last  
227 fieldwork period (2019), we carried out a walk-in-the-woods survey to obtain botanical  
228 specimens to match the Baka names of wild food taxa in our preliminary database, but also to  
229 verify whether the Baka knew, consumed or traded more plant species than they mentioned  
230 previously during the *ex-situ* interview sessions. Therefore, we asked the Baka to suggest several  
231 people of different ages and gender who were knowledgeable on wild edible plants and would  
232 agree to join us on our collection trips. We worked with one to four informants on each  
233 collection day. In total, we worked with 20 individuals (10 women and 10 men), aged between  
234 29 and 80 years, of which nine had participated previously in the *ex-situ* interviews (two in the  
235 dietary and the income recalls; two only in the free listing; five in all three methods). During 14

236 collection days into the area surrounding Le Bosquet and Kungu, we searched for plants that  
237 matched our preliminary list of folk taxa, but also asked our informants to point out any other  
238 edible species they saw (Supplementary File 1). When such a plant was encountered, we  
239 collected herbarium material using standard botanical methods [27]. Fieldtrips lasted from 7:00  
240 am to 15:00 pm, but the distance covered differed per day, as it depended on the number of  
241 plants collected. Many more species were collected in the first few days close to the village,  
242 while on the last days, several hours were spent walking to collect rare edible plants. We paid  
243 particular attention to clarify information on Baka folk taxa that consisted of more than one  
244 botanical species. For most specimens we collected, we asked our informants for 1) the local  
245 name (in Baka, French and/or Nzimé, the Bantu language in this area, if known); 2) plant part(s)  
246 used; 3) preparation and application methods; 4) when they had last consumed the plant; 5)  
247 whether a part of the plant was sold; 6) in the case of trees, whether the wood was commercially  
248 logged. We did not limit our ethnobotanical data to plant uses that were shared among our  
249 informants, but were keen to record differences in food plant knowledge, consumption frequency  
250 and appreciation of wild edibles among informants.

251 Duplicates of voucher specimens were deposited at the National Herbarium of Cameroon (YA)  
252 and at the herbarium of Naturalis Biodiversity Center (L). A third voucher was kept at the study  
253 site to verify local names and uses with Baka villagers during group discussions. Plant  
254 identification took place at Naturalis, using Central African herbarium specimens and literature,  
255 such as the Flora of West Tropical Africa [60], the Flore du Cameroun [61], and monographs on  
256 the tropical African flora [62-64]. This literature was also used to verify the vegetation types in  
257 which these wild food plants occurred naturally. For species that were difficult to identify, we

258 consulted botanical experts at Naturalis and abroad. Scientific names were updated using the  
259 online portal of Plants of the World Online [65].

260

## 261 **Data analysis**

262 We first analyzed the overall diversity of the WEPs reported and collected through the different  
263 methods. To assess the general characteristics of wild species consumed by the Baka,

264 information on life form, part used, habitat and commercial timber was categorized in a

265 spreadsheet, after which the distribution of these traits could be quantified. We used the Smith

266 index [66] to assess the saliency of the plant species reported during the free listing interviews.

267 To analyze the actual consumption of wild food plants reported during the dietary recalls, we

268 calculated the citation frequency of the WEPs mentioned as eaten during the previous 24 hours.

269 To analyze consumption data collected during the walk-in-the-woods survey, we categorized the

270 respondents' answers in the following categories: 1) consumed today/yesterday; 2) 3-7 days ago,

271 3) 2-4 weeks ago; 4) 1-12 months ago; 5) 1-2 years ago; 6) > 2 years ago; and 7) never [52]. We

272 visualized the ranking of the most recently consumed species according to the walk-in-the-woods

273 methods in a bar chart. We also calculated the most frequently sold WEPs from the overall list of

274 plants reported as commercialized in the income survey.

275

276 In order to assess whether the full potential of the methods had been used (dietary recalls,

277 freelisting and walk-in-the-woods), species accumulation curves [67] were produced by

278 calculating the cumulative number of species that were reported after interviewing a certain

279 number of informants (freelisting and dietary recalls) and after a certain amount of collection

280 days (walk-in-the-woods method). Contrary to usual practice, data were not randomized before  
281 producing the curves, as several relevant features of the data would have been lost.  
282 Finally, in order to analyze conflicts between commercial timber harvesting and the availability  
283 of wild food plants for the Baka, we traced evidence of wild fruit trees felled by timber  
284 companies by counting the number of logged tree trunks along the forest trails and on logging  
285 trucks passing through the village during 14 days. We cross-referenced wild fruit trees species  
286 observed as felled logs and/or said to be cut for commercial timber with the CITES appendices  
287 [68] and the IUCN Red List [69] to assess their current conservation status.

288

## 289 **Results**

### 290 **Diversity of wild edible plants**

291 A total of 94 folk taxa of WEP were reported during the three different *ex-situ* interview methods  
292 and the *in-situ* walk-in-the-woods trips, corresponding to ca. 91 species. The exact number of  
293 species is unclear, as eight vouchers could only be identified to genus level and for several West  
294 and Central African *Dioscorea* species (wild yams), the taxonomic species delimitation is not  
295 clear [70]. Moreover, the Baka recognize different forms within individual yam species and thus  
296 some local names refer to the same botanical taxon. In the case of *D. minutiflora*, the Baka  
297 distinguish three distinct types: ‘njàkàkà’, ‘báloko’ and ‘kuku’, all with different leaf and tuber  
298 morphology. All local and scientific names of each wild edible species, used parts, preparation  
299 methods, and the method(s) through which they were recorded are listed in the Supporting  
300 Information. The 91 wild edible plant species belonged to 43 different plant families, of which  
301 the best represented were Dioscoreaceae (ca. 9 species of wild yams), Irvingiaceae (8 spp.),

302 Anacardiaceae (5 spp., including 4 species of *Trichoscypha* fruits) and Zingiberaceae (5 spp. of  
303 *Aframomum*). Most wild food plants were trees (46%), followed by climbers (27%) including  
304 woody lianas and non-woody vines, herbs (19%), shrubs (7%) and ferns (1%). More than half  
305 (52.1%) of the wild edible plant species collected by the Baka naturally occurred in primary  
306 forest, 31.9% in secondary forests and the rest (16%) in open vegetation. We encountered very  
307 little primary forest that was untouched by loggers: the only patch of forest that did not show  
308 signs of commercial timber harvesting was dominated by *Gilberiodendron dewevrei*, located at  
309 ca. two hours walking distance from Le Bosquet. The selectively logged primary forest,  
310 however, contained the majority of the fruit and seed producing primary trees and lianas sought  
311 after by the Baka.

312 Of the 94 folk taxa of wild food plants, 38 were reported by the Baka during the free listing  
313 exercises. Initially, 51 local names were mentioned during these interviews, but 13 of those were  
314 later excluded because they were either synonyms of Baka plant names that had already been  
315 mentioned (three names) or they referred to wild mushrooms (two names), types of honey (six  
316 names) or cultivated plants (two names). The most salient WEPs (the most frequently listed first)  
317 emerging from the freelisting (Smith index > 0.1) were *Dioscorea burkilliana*, *D. praehensilis*, *D.*  
318 *cf. praehensilis* ('ba'), *Irvingia gabonensis*, *Baillonella toxisperma*, and *Panda oleosa*. Of the 83  
319 participants of the dietary recalls, 69 reported having eaten wild plants, and mentioned a total of  
320 12 different species. Two species that emerged from the dietary recalls (*Amaranthus dubius* and  
321 *Raphia* sp.) were not mentioned during the freelisting.

322 During the dietary recalls, 12 species of wild edible plants emerged, of which the most  
323 frequently eaten was *Gnetum cf. africanum* (mentioned in 50% of the interviews). The  
324 identification to species level of *Gnetum* was difficult due to the absence of flowering material

325 from male and female individuals during the time of our botanical survey. After *Gnetum* leaves,  
326 the second most often consumed were bush mango kernels (Irvingiaceae spp.; 22% of the  
327 interviews), *Raphia* palm wine (15%) and several species of wild yams (*Dioscorea* spp.; 15%).  
328 Detailed data on the contribution of WEPs to Baka diet compared to cultivated crops and store-  
329 bought food were published earlier [52].

330 During our walk-in-the-woods survey, much more WEP species were reported by the 20  
331 informants as recently eaten. Of the 82 WEP species for which we collected information on last  
332 consumption during the walk-in-the-woods survey, 26 were reported as consumed within the last  
333 month by at least one informant (Fig2). The most recently consumed was *Solanum erianthum*: the  
334 bitter fruits of this shrub were boiled with wild garlic bark (*Afrostryax lepidophyllus*) and  
335 (cultivated) pepper (*Capsicum frutescens*) and taken as a hot drink to wake up in the morning.  
336 Moreover, 36 species were eaten within the last 12 months, 11 species between one and two  
337 years ago, eight species more than two years ago and one species was never eaten by any of our  
338 20 informants (Fig 2). Of the 26 species consumed within the last month, 23 would not have  
339 surfaced from the dietary recalls only, and 16 would have been missed if only the freelisting and  
340 dietary recalls would have been carried out. These 16 edible species included two ferns  
341 (*Pteridium aquilinum* and *Diplazium sammatii*), three spices (*Xylopia parviflora*, *Olax latifolia*  
342 and *Ricinodendron heudelotti*), four fruits (*Passiflora foetida*, *Solanum erianthum*, *Musanga*  
343 *cecropioides* and *Uapaca* cf. *paludosa*), the inner stem of *Laccosperma secundiflorum*, three  
344 seeds (*Sterculia oblonga*, *Irvingia robur* and *I. wombulu*), one root (*Renealmia* sp. WTH64), the  
345 potable water from the stem of *Tetracera* sp. (WTH42) and the leaves of *Geophila lancistipula*,  
346 eaten as a luck charm.

347

348 **Fig 2. Wild edible species consumed by the 20 informants within the past month.**

349 \*Species also reported during freelisting

350 ~Species also reported during dietary recalls

351 †Species not reported during either freelisting or dietary recalls.

352

### 353 **Plant parts used and preparation methods**

354 Different parts of the wild food plants were eaten: most of them were fruits (37% of the species)  
355 and seeds (27%), followed by leaves (19%), tubers (12%), bark (5%) and exudate (1%). For 12  
356 species, more than one part was consumed, such as fruits and seeds of *Aframomum* spp., *Irvingia*  
357 *gabonensis*, *Diospyros* cf. *crassiflora*, and *Baillonella toxisperma*; fruits and stem sap of  
358 *Musanga cecropioides* and *Chrysophyllum albidum*; fruits and leaves of *Piper umbellatum* and  
359 *Olax latifolia*; fruits and roots of *Dioscoreophyllum cumminsii*, and bark and seeds of *Afrostryrax*  
360 *lepidophyllum*. Most WEPs were integrated to cooked meals: only 36% of the 108 edible plant  
361 parts were eaten raw, but preparation methods depended on the part(s) consumed (Table 2).

362

363 **Table 2. Plant parts eaten and preparation methods.**

| Part used            | Fruit<br>s | Leaves | Tuber<br>s | Seeds | Sap | Bark | Stem | Total |
|----------------------|------------|--------|------------|-------|-----|------|------|-------|
| Number of species    | 38         | 20     | 12         | 31    | 4   | 2    | 1    | 108*  |
| Eaten raw            | 31         | 1      | 0          | 3     | 4   | 0    | 0    | 39    |
| Eaten cooked         | 7          | 19     | 12         | 25    | 0   | 2    | 1    | 66    |
| Eaten raw and cooked | 0          | 0      | 0          | 3     | 0   | 0    | 0    | 3     |

364



365 \*Total number exceeds the 91 species, as some wild food plants yielded more than one edible  
366 part.

367

368 The daily meal of the Baka was generally composed by two main dishes: a starchy basis and a  
369 stew with a fatty component, leaves, meat or fish. The carbohydrates provided by wild plants  
370 came predominantly from wild yams (*Dioscorea* spp.). The collection of these tubers required  
371 expert knowledge, as the Baka first verified whether the plant held tubers that were ready to be  
372 consumed, which in the case of *D. semperflorens* was done by examining the color of its leaves.

373 The digging of the tubers required certain tools, like a wooden auger to remove the soil and  
374 extract the tuber without damaging it, a tool used specifically for both folk taxa of *D.*

375 *praehensilis*. Once dug out, the tubers were washed and boiled. Some wild yams were only  
376 consumed occasionally as an emergency food, like ‘boli’ (*Dioscorea* sp. WTH63), of which the  
377 name was translated as ‘adulterer’, referring to the shame felt when eating this tuber. Other  
378 occasionally consumed wild tubers provided the Baka with carbohydrates, like those of *Palisota*  
379 *cf. barteri* and *Dioscoreophyllum cumminsii*.

380 To accompany this starchy basis, the Baka prepared a stew in which leafy vegetables and  
381 condiments were combined with a fatty basis, mostly obtained from forest seeds. Fruits of  
382 *Irvingia* spp., *Baillonella toxisperma* and *Panda oleos* were gathered from the ground and the  
383 kernels were taken out. Most seeds were prepared in a similar way: the kernels were dried and/or  
384 roasted, and then pounded and/or ground to a powder that was mixed into the stew. Seeds could  
385 also be conserved for some time in the form of a pressed, oily cake. Leaves were either cut into  
386 thin slices (e.g., *Gnetum cf. africanum*) or pounded in a mortar (e.g., *Hillieria latifolia*) and added  
387 to the stew. Condiments were grated (*Afrostryrax lepidophyllus* bark), dried (*Aframomum* spp.

388 seeds), or roasted and crushed (seeds of *Ricinodendron heudelotii* and *Monodora myristica*)  
389 before being added to the dish.  
390 Some wild food plants were eaten only on specific occasions, mostly for ritual purposes. To  
391 prepare men before hunting expeditions and increase their success, women prepared the leaves of  
392 *Anchomanes difformis*, which were thought to make the hunter fearless for elephants, or the  
393 rhizome of *Renealmia* sp. (WTH64), which was thought to bring good luck to the hunter. The  
394 leaves of *Costus englerianus* or *Adenia mannii* were prepared to strengthening boys after their  
395 circumcision.

396

### 397 **Commercialization of wild edible plants**

398 During the recall exercise on general income received from sale over the 14 previous days, the  
399 Baka reported six different taxa as being sold. The most frequently commercialized NTFP was  
400 *Gnetum* cf. *africanum* (26% of the 114 interviews), far more than any of the other wild food  
401 plants, which were mentioned as sold in less than 5% of the interviews (seeds and oil of *Irvingia*  
402 *gabonensis*, *Baillonella toxisperma*, *Pentaclethra macrophylla*, bark of *Afrostryax lepidophyllus*  
403 and the fruits of *Aframomum* spp., indicated under the general name of ‘tondo’). During the  
404 walk-in-the-woods surveys, however, the Baka pointed out 24 different WEP species that they  
405 sold to middlemen (including the six previously mentioned), mostly in the form of fruits, seeds,  
406 or the oil from seeds. Of the 24 commercial species that appeared during the forest surveys, 13  
407 were commonly sold on the international NTFP market (Table 3). When we collected specimens  
408 during the walk-in-the-woods surveys, we discovered that the Baka name ‘tondo’ referred to four  
409 different species of *Aframomum*: *A. sceptrum*, *A. daniellii*, *A. subsericum* and *A. cf.*  
410 *longipetiolatum*. Only *A. cereum* was not sold as spice to middlemen, but just consumed within

411 the household. Of the 24 commercial species traded by the Baka, four appeared in the IUCN Red  
 412 List as vulnerable and two as near threatened (Table 3).

413

414 **Table 3. Wild food plant products sold by the Baka and their conservation status. Data**

415 **were retrieved through different methods.**

| Species                           | Plant parts            | Walk-in-the-woods | Income recalls | (Inter-) national trade | IUCN status     |
|-----------------------------------|------------------------|-------------------|----------------|-------------------------|-----------------|
| <i>Afrostryax lepidophyllus</i>   | bark                   | y                 | y              | [8]                     | Vulnerable      |
| <i>Irvingia gabonensis</i>        | fruits, seeds          | y                 | y              | [8]                     | Near threatened |
| <i>Panda oleosa</i>               | oil from seeds         | y                 |                | [7]                     | Least concern   |
| <i>Gnetum cf. africanum</i>       | leaves                 | y                 | y              | [8]                     | Near threatened |
| <i>Dioscorea cf. praeheasilis</i> | tuber                  | y                 |                | No data                 | Least concern   |
| <i>Baillonella toxisperma</i>     | fruits, oil from seeds | y                 | y              | Oil [7]                 | Vulnerable      |
| <i>Pentaclethra macrophylla</i>   | oil from seeds         | y                 | y              | [7]                     | Least concern   |
| <i>Garcinia kola</i>              | bark                   | y                 |                | [8]                     | Vulnerable      |
| <i>Piper guineense</i>            | fruits                 | y                 |                | [71]                    | Least concern   |
| <i>Parinari excelsa</i>           | firewood               | y                 |                | No data                 | Least concern   |
| <i>Xylopiya parviflora</i>        | fruits                 | y                 |                | [8]                     | Not evaluated   |
| <i>Irvingia robur</i>             | seeds                  | y                 |                | No data                 | Least concern   |
| <i>Ricinodendron heudelotii</i>   | seeds                  | y                 |                | [8]                     | Vulnerable      |
| <i>Cola acuminata</i>             | seeds                  | y                 |                | [8]                     | Least concern   |

|                                      |                       |   |    |         |               |
|--------------------------------------|-----------------------|---|----|---------|---------------|
| <i>Tetrapleura tetraptera</i>        | fruits                | y |    | [8]     | Least concern |
| <i>Laccosperma secundiflorum</i>     | stem (craft material) | y |    | No data | Least concern |
| <i>Aframomum cf. longipetiolatum</i> | fruits                | y | y* | [8]     | Not evaluated |
| <i>Aframomum subsericum</i>          | fruits                | y | y* | No data | Not evaluated |
| <i>Aframomum daniellii</i>           | fruits                | y | y* | No data | Least concern |
| <i>Aframomum sceptrum</i>            | fruits                | y | y* | [8]     | Not evaluated |
| <i>Trichoscypha</i> sp. WTH25        | fruits                | y |    | [71]    | -             |
| <i>Monodora myristica</i>            | fruits                | y |    | [71]    | Least concern |
| <i>Piper umbellatum</i>              | fruits                | y |    | No data | Not evaluated |
| <i>Solanum erianthum</i>             | fruits                | y |    | No data | Not evaluated |

416 \* all mentioned under the Baka folk taxon ‘tondo’.

417

418 During our forest walks, we identified six WEP of which the wood was observed as logged or  
419 said to be logged by the Baka (Table 4). Three of these species were considered as vulnerable by  
420 the IUCN, but none appeared on the CITES Appendices I or II. The moabi tree (*Baillonella*  
421 *toxisperma*), highly valued by the Baka for their fresh fruits and seed oil, was the most sought  
422 after by the logging companies operating in Baka territory. Our informants mentioned that only  
423 trees exceeding one meter in diameter were felled, so several smaller individuals were still  
424 present. However, the extraction of large moabi trees by timber companies strongly affected the  
425 amount of fruits and seeds that remained available for the Baka’s subsistence and cash income.  
426 Another species that we observed as felled trunks was *Entandrophragma cylindricum*, which  
427 itself was inedible, but commonly hosted edible caterpillars, an important food for the Baka.  
428 During the forest walks, we also observed several (smaller) trees cut down by the Baka

429 themselves, mostly to obtain fresh leaves of *Gnetum* cf. *africanum* lianas, to harvest honey, and  
 430 once to collect the bitter bark of *Garcinia kola*, which was added to *Raphia* palm wine as a  
 431 flavoring agent.

432

433 **Table 4. Commercial hardwood tree species producing edible fruits and/or seeds consumed**  
 434 **by the Baka, trade names and current conservation status.**

| Scientific name                         | Baka name | Commercial trade name | Nr. logs observed* | IUCN status   |
|-----------------------------------------|-----------|-----------------------|--------------------|---------------|
| <i>Baillonella toxisperma</i>           | Mabe      | Moabi                 | 9                  | Vulnerable    |
| <i>Chrysophyllum lacourtianum</i>       | Bambu     | Longhi,<br>Abam       |                    | Not evaluated |
| <i>Diospyros</i> cf. <i>crassiflora</i> | Lembe     | (Gabon)<br>Ebony      | 2                  | Vulnerable    |
| <i>Trichoscypha</i> cf. <i>abut</i>     | Agbo      | -                     |                    | Least concern |
| <i>Desbordesia insignis</i>             | Ntuo      | Alep                  |                    | Not evaluated |
| <i>Sterculia oblonga</i>                | Egboyo    | Eyong                 |                    | Vulnerable    |
| <i>Afzelia</i> sp.                      | Tanda     | Doussier              | 3                  | No data       |

435 \* Observed during 14 days by the authors. When no logs were observed, the species were  
 436 mentioned by the Baka as logged by timber companies

437

## 438 Discussion

### 439 High diversity in wild food plants

440 A major insight provided by this study is the high diversity of WEPs known and eaten by the  
441 Baka (94 folk taxa, 91 species). Such results are comparable to earlier ethnographic studies  
442 carried out among small forest dwelling societies in the Congo Basin [2]. Even though the Baka  
443 are facing socio-ecological changes and potential dietary transition [45], our results show that  
444 they still know and consume a large diversity of wild edible plants. Apart from the fact that the  
445 Baka no longer processed and consumed the oil of *Pentaclethra macrophylla*, but rather sold the  
446 seeds to middlemen who processed them elsewhere, we found little evidence for loss of  
447 knowledge or disappearing plant uses [52]. Most wild food plants occurred in (selectively  
448 logged) primary forests, and consisted predominantly of fruits and seeds of canopy trees and  
449 lianas, underlying the importance of this ecosystem for Baka diet and culture. For their daily fat  
450 intake, the Baka depended heavily on the large fruits and seeds of the Irvingiaceae family, *Panda*  
451 *oleosa* and *Poga oleosa*. These species are typical to the Congo Basin forests, in which complex  
452 food and dispersal interactions take place between big terrestrial mammals (such as elephants)  
453 and the local flora [62,72,75]. Many of the oily seed-producing trees in Central Africa are  
454 ecological keystone species that are crucial for the survival of local wildlife [72], on which  
455 forest-dwelling groups such as the Baka rely on for meat [13].

456 The diversity of the wild plants eaten by the Baka covers a wide variety of plants parts,  
457 highlighting the role played by WEP in providing important nutrients that may not be found in  
458 planted crops and store-bought foods. This diversity is also targeted by traders in timber and non-  
459 timber forest products: at least 30 WEP species are either sold to middlemen and enter the (inter-  
460 ) national NTFP market or are extracted by loggers, what sometimes causes conflicts between  
461 the Baka and commercial parties entering their territory. The various direct and indirect effects

462 of logging and trade in NTFPs in this region do not only affect human food resources, but have  
463 an impact on the entire ecosystem.

464

## 465 **Different methods yield different results**

466 **Although our research was performed among a relatively small human population,** our results  
467 show that different methods resulted in substantial differences in the collected data. The *ex-situ*  
468 interviews did not capture the full diversity of WEPs known, used and sold by the Baka. As  
469 shown in Fig 3, the species accumulation curve of the freelisting method flattened after  
470 interviewing 55 individuals. Typically, 14 of the 55 respondents did not report any WEP, which  
471 resulted in several flat sections in the curve.

472

473 **Fig 3. Species accumulation curves of WEPs mentioned during the 55 freelisting and 83**  
474 **dietary recall interviews in Le Bosquet and Kungu, southeast Cameroon, 2018.**

475

476 The species accumulation curve for the dietary recall method flattened after interviewing 83  
477 people (Fig 3). Between respondents 46 and 83, only three new species were mentioned, which  
478 suggests that interviewing more respondents would not have led to much more wild edible  
479 species being mentioned. Therefore, both freelisting and dietary recalls appeared to have  
480 captured most of the WEP diversity that was possible by these methods. In contrast, the species  
481 accumulation curve for the walk-in-the-woods method flattened somewhat after 11 days, but not  
482 completely (Fig4). Our Baka informants indeed mentioned that there were additional rare species  
483 that could only be found after walking for hours in the forest. We know that at least four other  
484 edible species could have been found if we had more time to venture further into the forest. From

485 their Baka names and the literature [2, 59] we assume that these were the African mammee apple  
486 (*Mammea africana*) with large edible fruits, a species of *Azizelia* of which the red arils around the  
487 seeds were eaten, a species of wild *Raphia* palm of which the sap was fermented into palm wine,  
488 and the African walnut tree (*Coula edulis*) that produced highly valued nuts.

489

490 **Fig 4. Species accumulation curve of wild edible plants mentioned during 14 days of**  
491 **walking in the forest with 20 informants around Le Bosquet and Kungu, southeast**  
492 **Cameroon, 2019.**

493

494 Regarding the overall WEP diversity recorded through the different methods, we see that the  
495 botanical diversity reported would have been considerably less if we would only have conducted  
496 the *ex-situ* interviews. The freelisting (38 WEP species) and dietary recalls (12 spp.) resulted in  
497 just a fraction of the 91 species found during the walk-in-the-woods survey. Such low number of  
498 species reported may be partly due to the fact that not every participant understood the concept  
499 of ‘wild edible plant’. Wild food plants play an important role in Baka livelihood [2, 3] and  
500 knowledge related to edible plants is acquired early during childhood [73]. Therefore, it seems  
501 unlikely that those Baka adult informants who did not report any WEP during the freelisting did  
502 not know any. They probably did not understand the domain, or the domain was too ubiquitous,  
503 a limitation that has been also found in other settings [74].

504 During the walk-in-the-woods method, the researcher can directly exclude items pointed out by  
505 informants that fall outside the domain ‘wild edible plant’, such as fungi, animal products and  
506 cultivated plants, although the latter category can be challenging due to the presence of wild  
507 species under various degrees and types of human management and domestication [48]. Local



508 names listed as ‘wild edible plant’ during *ex-situ* interviews may later, during botanical  
509 collection trips, appear to refer to domesticated crops, like the cultivated American crop species  
510 tania (*Xanthosoma sagittifolium*) and chili pepper (*Capsicum frutescens*), which were listed as  
511 wild edibles during freelisting interviews in the DRC [34]. This was also the case in a recent  
512 study on WEP consumed by Baka south of the Dja Reserve [76], in which the domesticated  
513 crops okra (*Abelmoschus esculentus*), sorrel (*Hibiscus sabdariffa*) and chili pepper were listed as  
514 wild edible plants, as well as an unidentified yam with the Baka name mboto (*Dioscorea* sp.10),  
515 which was collected by us and identified as the domesticated *Dioscorea dumetorum*.

516 Our botanical inventory also revealed that a single folk taxon mentioned during interviews can  
517 actually include several species. The local Baka name ‘tondo’ referred to three different species  
518 of *Aframomum*, the term ‘bokoko’ to two species of *Klainedoxa*, and ‘payo’ to three different  
519 species of *Irvingia* [75]. On the other hand, for the single taxon *Dioscorea minutiflora*, the Baka  
520 distinguished in three distinct types. The huge edible plant diversity collected in the forest survey  
521 was facilitated by our previously established list of folk taxa. If this preliminary work would not  
522 have been conducted, we would have needed more days of fieldwork and more informants to  
523 capture the full diversity of WEP consumed by the Baka.

524 While only six commercial wild food plants were recorded through the income recall surveys,  
525 the walk-in-the-woods method revealed 24 traded species, of which several had never been  
526 reported previously as sold in Cameroon. Moreover, this *in-situ* method allowed us to observe  
527 traces of logged WEP species and unsustainable ways of harvesting NTFPs. Only ten of the 26  
528 species mentioned as recently consumed during the walk-in-the-woods method were reported  
529 during the freelisting, while just three of them also emerged through the dietary recalls, although  
530 the number of people interviewed during the last two methods was substantially higher. In other

531 words, 23 recently consumed species would not have been identified with dietary recalls only,  
532 and 16 would have been missed if only the freelisting and dietary recalls would have been  
533 performed. We speculate that these were plants that were easily forgotten (e.g., spices,  
534 condiments, small fruits), species that people feel ashamed of eating (weeds), or items that were  
535 previously missed during the freelistings due to misinterpretation of the term ‘wild edible plant’  
536 (e.g., drinking water from lianas, edible latex, ritual food plants). If only using the *ex-situ*  
537 interview data, we would have missed four wild fruit trees that were extracted by timber  
538 companies. Only two of these WEP-producing commercial hardwoods were mentioned in the  
539 freelisting interviews (*Baillonella toxisperma* and *Chrysophyllum lacourtianum*), while only one  
540 was recorded through the dietary recalls (*B. toxisperma*).

541 The advantage of assessing plant knowledge within the ecological context is that many species  
542 are encountered that do not pop-up quickly in people’s minds during a (shorter) interview outside  
543 the forest. When walking through the natural environment where edible plants occur, it is easier  
544 to remember them because of the amounts of visual stimuli to this knowledge at that moment  
545 [77]. The walk-in-the-woods method, however, is laborious to perform and requires additional  
546 botanical collection, as more rare species will be encountered that are hard to identify, for which  
547 the help of taxonomic specialists and support from herbaria is needed. The number of informants  
548 that can be taken into the field is also limited and thus forest surveys are not suitable to draw  
549 conclusions on the general patterns of foraging, plant knowledge and uses.

550 On the other hand, *ex-situ* interview methods (including freelisting and dietary recalls) are  
551 known to assess the most salient useful plants among a large group of people in a relatively short  
552 time, as these techniques are limited by their spatiotemporal context [32, 37]. Freelisting yields  
553 much more information than just plant names and saliency, but also shows the items within a

554 specific (local) domain and consensus in a community [74]. Conducted among a large number of  
555 people and in different seasons, dietary and income recall surveys provide a general overview of  
556 plants that contribute substantially to people's daily meals and subsistence strategies. Our results  
557 indicate, however, that these short *ex-situ* interviews missed out a substantial part of the WEP  
558 diversity known, consumed and traded by the Baka. Our insights show the importance of not  
559 relying on either *ex-situ* or *in-situ* methods, but rather combining both approaches to maximize  
560 the outputs assessing ethnobotanical practices, which was earlier highlighted by Quinlan [74].  
561 Since they can lead to an underestimation of wild edible plants known, consumed and  
562 commercially exploited, the implications of studies based solely on *ex-situ* interviews can be  
563 grave. Results of such studies may not be representative for the situation on the ground, as trade  
564 in NTFPs or conflicts between wild fruit collection and logging of fruit-producing trees may  
565 remain invisible. An assessment of Baka knowledge on wild edible plants relying on *ex-situ*  
566 methods only might have led to the conclusion that the Baka lost much of their knowledge, or do  
567 not use the forest so intensively as their ancestors did. Moreover, the calculations of the  
568 contribution of wild plants to local diet and nutrition would have been inaccurate. Several studies  
569 based on dietary recalls have concluded that WEP do not play an important role in local diets.  
570 Some scholars said they were "confident to provide a fair representation of the dietary  
571 contribution of WEP on a population level in our sample" [51:8], even though their botanical  
572 collection was limited to finding specimens to match the local names mentioned during their  
573 dietary recalls and freelisting interviews. In Brazil, scholars stated after their freelisting and  
574 dietary recall surveys that "the low consumption of wild species [...] is notable, which suggests  
575 that, in practice, these foods contribute little to contemporary dietary enrichment" [50:337]. Such  
576 data could be misused by policy makers, who may conclude that rural communities do not need

577 the forest that much as previously thought. Considering the importance of wild plants for food  
578 security and for providing nutrients that are not present in other foods [78], and the fact that  
579 children are major consumers of wild fruits but hardly recruited as interviewees [79, 80], it is  
580 crucial to draw the most accurate overview of the diversity of wild food items used by local  
581 people, especially in species-rich ecosystems in which plants, animals and human livelihoods are  
582 under increasing pressure.

583

## 584 **Conclusions**

585 Our results show that choosing an appropriate method (or combination of methods) is essential  
586 for assessing wild food plant knowledge and consumption. Ethnobotanical inventories that leave  
587 room for informants to point out edible plants that do not appear on predefined lists are essential  
588 to capture the full diversity of edible forest species. Our *in-situ* inventories yielded a wide variety  
589 of WEP that were not covered by our *ex-situ* interview methods, revealed details on local  
590 patterns of foraging and challenged the general ideas of knowledge loss and underutilization of  
591 wild food plants in the region. Our mixed methods approach shows the importance of cross-  
592 referencing data, not only between different types of interviews, but also between interviews and  
593 direct observation during forest trips, for a better assessment of the diversity, consumption  
594 frequency, trade and conflicting uses of WEP. We therefore recommend that wild plant  
595 knowledge and use should be assessed through the use of a mixed methods approach. Using  
596 ‘open’ walk-in-the-woods surveys, in which informants are encouraged to mention any useful  
597 plant they know or randomly encounter, after which they are asked when they last used it,  
598 provides a wider variety of data. Employing the walk-in-the-woods technique merely to supply  
599 specimens for previously composed lists of useful plants from literature or interviews limits the

600 capacity of this powerful technique to assess wild plant knowledge and use. Freelisting and  
601 dietary recalls can be used to provide quantitative data and a more general overview, but  
602 researchers should not limit themselves to such methods if they want to capture the full diversity  
603 of plants known and used, especially in the case when biased conclusions may have large  
604 implications for people's future livelihood, culture and wellbeing.

605

## 606 **Acknowledgements**

607 We would like to thank our assistants Appolinaire Ambassa, Ernest Isidore Simpoh and driver  
608 Alain Hyppolite Fezeu for their help with the fieldwork. We are grateful to Professor  
609 Bonaventure Sonké for his support in Cameroon. David Harris (Edinburgh herbarium); Jan  
610 Wieringa, Paul Maasand Carel Jongkind (Naturalis) and Marc Sosef (Meise Botanical Gardens)  
611 helped us to identify our specimens. Finally, our greatest gratitude goes to all Baka children,  
612 women and men with whom we have lived and worked. Thank you for your trust, hospitality and  
613 generous hearts.

614

## 615 **References**

- 616 1. Riddell M. Assessing the impacts of conservation and commercial forestry on livelihoods in  
617 northern Republic of Congo. *Conserv Soc.* 2013; 11:199. doi: 10.4103/0972-4923.121002.
- 618 2. Bahuchet S. *Dans la forêt d'Afrique Centrale: les Pygmées Baka et Aka.* Paris: Peeters  
619 Sela; 1992.
- 620 3. Dounias E. Perception and use of wild yams by the Baka hunter-gatherers in south  
621 Cameroon. In: Hladik CM, Hladik A, Linares OF, Pagezy H, Semple A, Hadley M, editors.

- 622 Tropical forests, people and food: Biocultural interactions and applications to development.  
623 Paris: UNESCO-Parthenon; 1993. pp. 621–632.
- 624 4. Van Dijk JFW. Non-timber forest products in the Bipindi-Akom region, Cameroon: a socio-  
625 economic and ecological assessment. Wageningen: Tropenbos-Cameroon Series 1; 1999.
- 626 5. Terashima H, Ichikawa M. A comparative ethnobotany of the Mbuti and Efe Hunter-  
627 Gatherers in the Ituri Forest, Democratic Republic of Congo. *Afr Study Monogr.* 2003;  
628 24:1–168.
- 629 6. Yasuoka H. Fledging agriculturalists? Rethinking the adoption of cultivation by the Baka  
630 hunter-gatherers. *Afr Study Monogr Supplementary Issues* 2012; 43: 85–114.
- 631 7. Hoare AL. The use of non-timber forest products in the Congo basin: Constraints and  
632 opportunities. New York: The Rainforest Foundation; 2007.
- 633 8. Ingram V, Schure J. Review of Non Timber Forest Products (NTFPs) in Central Africa.  
634 Yaoundé: CIFOR; 2010.
- 635 9. Ndoye O, Tieguhong JC. Forest resources and rural livelihoods: the conflict between timber  
636 and non-timber forest products in the Congo Basin. *Scand J For Res.* 2004; 19(S4): 36-44  
637 doi: 10.1080/14004080410034047.
- 638 10. Baudron F, Tomscha SA, Powell B, Groot JCJ, Gergel SE, Sunderland T. Testing the  
639 various pathways linking forest cover to dietary diversity in tropical landscapes. *Front*  
640 *Sustain Food Syst.* 2019; 3: 97. doi: 10.3389/fsufs.2019.00097.
- 641 11. Shapiro A, Grantham HS, Aguilar-Amuchastegui N, Murray NJ, Gond V, Bonfils D,  
642 Rickenbach O. Forest condition in the Congo Basin for the assessment of ecosystem  
643 conservation status. *BioRxiv [Preprint]*. Available from

- 644 <https://www.biorxiv.org/content/10.1101/2020.03.25.008110v1>doi:  
645 10.1101/2020.03.25.008110.
- 646 12. De Wasseige C, De Marcken P, Bayol N, Hiol Hiol F, Mayaux P, Desclée B, et al. Les  
647 forêts du Bassin du Congo: État des Forêts 2010. Luxemburg: Office des publications de  
648 l'Union Européenne; 2012.
- 649 13. Fa JE, Currie D, Meeuwig J. Bushmeat and food security in the Congo Basin: Linkages  
650 between wildlife and people's future. *Environ Conserv.* 2003; 30: 71-78.
- 651 14. Rist L, Shanley P, Sunderland T, Sheil D, Ndoye O, Liswanti N, et al. The impacts of  
652 selective logging on non-timber forest products of livelihood importance. *For Ecol Manag.*  
653 2012; 268: 57–69. doi: 10.1016/j.foreco.2011.04.037.
- 654 15. Chazdon RL, Harvey CA, Komar O, Griffith DM, Ferguson BG, Martínez-Ramos M, et al.  
655 Beyond reserves: A research agenda for conserving biodiversity in human-modified tropical  
656 landscapes. *Biotropica* 2009; 41: 142–153. doi: 10.1111/j.1744-7429.2008.00471.x.
- 657 16. Pardo-de-Santayana M, Macia MJ. The benefits of traditional knowledge. *Nature.* 2015;  
658 518: 487–488. doi: 10.4337/9781783474257.iii.19.
- 659 17. Pandey AK, Tripathi Y. Ethnobotany and its relevance in contemporary research. *J Med*  
660 *Plants Stud.* 2017; 5: 123–129.
- 661 18. Ickowitz A, Powell B, Salim MA, Sunderland TC. Dietary quality and tree cover in Africa.  
662 *Glob Environ Change.* 2014; 24: 287-294. doi: 10.1016/j.gloenvcha.2013.12.001.
- 663 19. Hladik CM, Hladik A, Linares OF, Pagezy H, Semple A, Hadley H. Tropical forests, people  
664 and food: Biocultural interactions and applications to development. Paris: UNESCO-  
665 Parthenon; 1993.

- 666 20. Ngome PIT, Shackleton C, Degrande A, Tieguhong JC. Addressing constraints in promoting  
667 wild edible plants' utilization in household nutrition: case of the Congo Basin forest area.  
668 *Agric Food Sec.* 2017; 6(1): 20. doi: 10.1186/s40066-017-0097-5.
- 669 21. Robillard M, Bahuchet S. Les Pygmées et les autres: terminologie, catégorisation et  
670 politique. *J Africanist.* 2012; 82(1/2): 15-51.
- 671 22. Gallois S, Duda R, Hewlett B, Reyes-García V. Children's daily activities and knowledge  
672 acquisition: a case study among the Baka from southeastern Cameroon. *J Ethnobiol*  
673 *Ethnomed.* 2015; 11: 86. doi: 10.1186/s13002-015-0072-9.
- 674 23. Leclerc C. L'adoption de l'agriculture chez les Pygmées Baka du Cameroun: Dynamique  
675 sociale et continuité structurale. Versailles: Editions Quae; 2012.
- 676 24. Esam Awu H. Conservation-induced resettlement: The case of the Baka of southeast  
677 Cameroon - a variation on the habitual mobility-immobility nexus. *Transfers.* 2016; 6(2):  
678 54-73. doi: 10.3167/TRANS.2016.060205.
- 679 25. Ramirez Rozzi FV. Reproduction in the Baka pygmies and drop in their fertility with the  
680 arrival of alcohol. *PNAS.* 2018; 115(27): E6126-E6134.
- 681 26. Thomas E, Vandebroek I, Van Damme P. What works in the field? A comparison of  
682 different interviewing methods in ethnobotany with special reference to the use of  
683 photographs. *Econ Bot.* 2007; 61: 376-384 doi: 10.1663/0013-0001.
- 684 27. Martin GJ. *Ethnobotany: A methods manual.* London: Earthscan; 2010.
- 685 28. Quiroz D, Sosef MSM, Van Andel TR. Why ritual plant use has ethnopharmacological  
686 relevance. *J Ethnopharmacol.* 2016; 188: 48-56. doi: 10.1016/j.jep.2016.05.006.
- 687 29. Quinlan M. Considerations for collecting freelists in the field: Examples from Ethobotany.  
688 *Field methods.* 2005; 17: 219-234. doi: 10.1177/1525822X05277460.



- 689 30. Mengistu F, Hager H. Wild edible fruit species cultural domain, informant species  
690 competence and preference in three districts of Amhara region, Ethiopia. *Ethnobot Res App.*  
691 2009; 6: 487-502.
- 692 31. Ghorbani A, Langenberger G, Sauerborn J. A comparison of the wild food plant use  
693 knowledge of ethnic minorities in Naban River Watershed National Nature Reserve,  
694 Yunnan, SW China. *J Ethnobiol Ethnom.* 2012; 8: 17. doi: 10.1186/1746-4269-8-17.
- 695 32. Pires de Sousa DC, Taboada Soldati G, Monteiro JM, de Sousa Araújo TA, Albuquerque  
696 UP. Information retrieval during free listing is biased by memory: Evidence from medicinal  
697 plants. *PLoS ONE.* 2016; 11: 1–15. doi: 10.1371/journal.pone.0165838.
- 698 33. Fongzossie EF, Nyangono CFB., Biwole AB, Ebai PNB, Ndifongwa NB, Motove J, et al.  
699 Wild edible plants and mushrooms of the Bamenda Highlands in Cameroon: Ethnobotanical  
700 assessment and potentials for enhancing food security. *J Ethnobiol Ethnom.* 2020; 16: 1–10.  
701 doi: 10.1186/s13002-020-00362-8.
- 702 34. Termote C, Van Damme P, Djailo BD. Eating from the wild: Turumbu, Mbole and Bali  
703 traditional knowledge on non-cultivated edible plants, District Tshopo, DR Congo. *Genet*  
704 *Resour Crop Ev.* 2011; 58: 585–618 doi: 10.1007/s10722-010-9602-4.
- 705 35. Lulekal E, Asfaw Z, Kelbessa E, Van Damme P. Ethnomedicinal study of plants used for  
706 human ailments in Ankober District, North Shewa Zone, Amhara region, Ethiopia. *J*  
707 *Ethnobiol Ethnomed.* 2013; 9: 63. doi: 10.1186/1746-4269-9-63.
- 708 36. Phillips O, Gentry AH. The useful plants of Tambopata, Peru: 1. Statistical hypotheses tests  
709 with a new quantitative technique. *Econ Bot.* 1993; 47: 15–32. doi: 10.1007/BF02862203.

- 710 37. Paniagua Zambrana NY, Bussmann RW, Hart RRE, Moya Huanca AL., Ortiz Soria G, Ortiz  
711 Vaca MMO., et al. To list or not to list? The value and detriment of freelisting in  
712 ethnobotanical studies. *Nat Plants*. 2018; 4(4): 201–204. doi: 10.1038/s41477-018-0128-7.
- 713 38. Cruz Da Cunha LVF, De Albuquerque UP. Quantitative ethnobotany in an Atlantic forest  
714 fragment of Northeastern Brazil: Implications to conservation. *Environ Monit Assess*. 2006;  
715 114: 1–25. doi: 10.1007/s10661-006-1074-9.
- 716 39. Kuhnlein HV. Introduction: Why are Indigenous Peoples' food systems important and why  
717 do they need documentation? In: Kuhnlein HV, Erasmus B, Spigelski D, editors. *Indigenous*  
718 *Peoples' food systems: the many dimensions of culture, diversity and environment for*  
719 *nutrition and health*. Rome: FAO; 2009. pp. 1–8.
- 720 40. Reyes-García V, Vadez V, Huanca T, Leonard W, Wilkie D. Knowledge and consumption  
721 of wild plants: A comparative study in two Tsimane' villages in the Bolivian Amazon.  
722 *Ethnobot Res Appl*. 2005; 3: 201 doi: 10.17348/era.3.0.201-208.
- 723 41. De Albuquerque UP. Re-examining hypotheses concerning the use and knowledge of  
724 medicinal plants: A study in the Caatinga vegetation of NE Brazil. *J Ethnobiol Ethnomed*.  
725 2006; 2: 30. doi: 10.1186/1746-4269-2-30.
- 726 42. Gross DR. Time allocation: a tool for the study of cultural behavior. *Annu Rev Anthropol*.  
727 1984; 13(1): 519–558.
- 728 43. Munger RG, Folsom AR, Kushi LH, Kaye SA, Sellers TA. Dietary assessment of older Iowa  
729 women with a food frequency questionnaire: nutrient intake, reproducibility, and  
730 comparison with 24-hour dietary recall interviews. *Am J Epidemiol*. 199; 2(136): 192-200.  
731 doi: 10.1093/oxfordjournals.aje.a116485.

- 732 44. Friant S, Ayambem WA, Alobi AO, Ifebueme NM, Otukpa OM, Ogar DA, Alawa CBI, et  
733 al. Life on the rainforest edge: food security in the agricultural-forest frontier of Cross River  
734 state, Nigeria. *Front Sustain Food Syst.* 2019; 3: 1–14. doi: 10.3389/fsufs.2019.00113.
- 735 45. Reyes-García V, Powell B, Díaz-Reviriego I, Fernández-Llamazares Á, Gallois S, Gueze M.  
736 Dietary transitions among three contemporary hunter-gatherers across the tropics. *Food*  
737 *Secur.* 2019; 11: 1–14. doi: 10.1007/s12571-018-0882-4.
- 738 46. Levang P, Lescuyer G, Noubissi D, Déhu C, Brousolle L, Trees F, Lescuyer G. Does  
739 gathering really pay? Case studies from forest areas of the East and South regions of  
740 Cameroon. *For Trees Livelihoods.* 2015; 24(2): 128-143. doi:  
741 10.1080/14728028.2014.1000980.
- 742 47. Delang CO. Not just minor forest products: the economic rationale for the consumption of  
743 wild food plants by subsistence farmers. *Ecol Econ.* 2006; 59: 64-73. doi:  
744 10.1016/j.ecolecon.2005.10.006.
- 745 48. Bharucha Z, Pretty J. The roles and values of wild foods in agricultural systems. *Philos*  
746 *Trans R Soc B: Biological Sciences.* 2010; 365: 2913–2926. doi: 10.1098/rstb.2010.0123.
- 747 49. Ogle BM. Wild vegetables and micronutrient nutrition: Studies on the significance of wild  
748 vegetables in women’s diets in Vietnam. Ph. D. thesis, University of Uppsala. 2001
- 749 50. Do Nascimento VT, de Lucena RFP, Maciel MIS, de Albuquerque UP. Knowledge and use  
750 of wild food plants in areas of dry seasonal forests in Brazil. *Ecol Food Nutr.* 2013; 52: 317–  
751 343. doi: 10.1080/03670244.2012.707434.
- 752 51. Termote C, Bwama Meyi M, Dhed'a Djailo B, Huybregts L, Lachat C, Kolsteren P, Van  
753 Damme P. A biodiverse rich environment does not contribute to a better diet: a case study  
754 from DR Congo. *PLoS ONE.* 2012; 7(1): e30533. doi: 10.1371/journal.pone.0030533.

- 755 52. Gallois S, Heger WT, van Andel TR, Sonké B, Henry AG. From bush mangoes to bouillon  
756 cubes: Wild plants and diet among the Baka, forager-horticulturalists from southeast  
757 Cameroon. *Econ Bot.* 2020; 74: 46-58. doi: 10.1007/s12231-020-09489-x.
- 758 53. Betti JL, Kourogue RL, Mbong FA, Fils PEB, Njukouyou OFN. Diversity in the usages of  
759 edible wild plants by the Baka and Bakwélé in the periphery of the Tala Forest Management  
760 Unit, North Congo. *Ethnobot Res Appl.* 2020; 19: 1-20.
- 761 54. Grandjean AC. Dietary intake data collection: Challenges and limitations. *Nutr Rev.* 2012;  
762 &70: 101–104. doi: 10.1111/j.1753-4887.2012.00545.x.
- 763 55. Letouzey R. Notice de la carte phytogéographique du Cameroun au 1:500000: 4. Domaine  
764 de la forêt dense humide toujours verte. Toulouse: Institut de la Carte Internationale de la  
765 Végétation; 1985.
- 766 56. ISE. International Society of Ethnobiology Code of Ethics (with 2008 additions). [2006].  
767 Available from <http://ethnobiology.net/code-of-ethics/>.
- 768 57. Kennedy G, Ballard T, Dop M. Guidelines for measuring household and individual dietary  
769 diversity. Rome: FAO; 2011.
- 770 58. Godoy R, Reyes-García V, Huanca T, Tanner S, Seyfried C. On the measure of income and  
771 the economic unimportance of social capital: Evidence from a native Amazonian society of  
772 farmers and foragers. *J Anthropol Res.* 2007; 63(2): 239-260.
- 773 59. Brisson, R. *Petit Dictionnaire Baka-Français, Sud Cameroun*. Paris: l'Harmattan; 2010.
- 774 60. Royal Botanical Gardens Kew. *Flora of West Tropical Africa: all territories in West Africa*  
775 *South of Latitude 18° N. and to the West of Lake Chad*. Kew: Royal Botanical Gardens;  
776 1931-1973.

- 777 61. Association de Botanique Tropicale. Flore du Cameroun. Yaoundé: Herbar National du  
778 Cameroun; 1963-2018.
- 779 62. Harris DJ. A revision of the Irvingiaceae in Africa. Bull Jard Bot Natl Belg. 1996; 65(1/2):  
780 143-196.
- 781 63. Hawthorne WD, Jongkind CCH. Woody plants of western African forests: A guide to the  
782 forest trees, shrubs and lianas from Senegal to Ghana. Kew: Royal Botanic Gardens; 2006.
- 783 64. Harris DJ, Wortley AH. Monograph of *Aframomum* (Zingiberaceae). Syst Bot Monogr.  
784 2018; 140: 1-204.
- 785 65. Plants of the World Online. Royal Botanic Gardens, Kew. [2020]. Available from  
786 <http://www.plantsoftheworldonline.org>.
- 787 66. Pennec F, Wencélius J. FLAME 1.1 Free-List Analysis under Microsoft Excel. User's  
788 Guide. Paris: CNRS; 2012.
- 789 67. Peroni N, Farias H, Araujo P, Hanazaki N. Ecological methods in ethnobotanical and  
790 ethnobiological research: Using diversity measurements and richness estimators. In:  
791 Albuquerque UP, Cruz da Cunha LVF, Paiva de Lucena RF, Alves RRN, editors. Methods  
792 and techniques in ethnobiology and ethnoecology. New York: Springer; 2014. pp. 398–412.
- 793 68. CITES. Convention on International Trade in Endangered Species of Wild Fauna and Flora.  
794 Appendices I, II, III. [2019]. Available from <https://www.cites.org/eng/app/appendices.php>
- 795 69. IUCN. IUCN Red List of Threatened Species. Version 2020-1. [2020]. Available from  
796 <https://www.iucnredlist.org>.
- 797 70. Magwé-Tindo J, Wieringa JJ, Sonké B, Zapfack, L, Vigouroux Y, Couvreur TLP, Scarcelli  
798 N. Guinea yam (*Dioscorea* spp., Dioscoreaceae) wild relatives identified using whole  
799 plastome phylogenetic analyses. Taxon. 2018; 67(5): 905-915. doi: 10.12705/675.4.

- 800 71. Eyog Matig O, Ndoye O, Awono A, Kengue J. Les fruitiers forestiers comestibles du  
801 Cameroun. Cotonou: IPGRI; 2006.
- 802 72. Beaune D, Fruth B, Bollache L, Hohmann G, Bretagnolle F. Doom of the elephant-  
803 dependent trees in a Congo tropical forest. *For Ecol Manag.* 2013; 295: 109–117. doi:  
804 10.1016/j.foreco.2012.12.041.
- 805 73. Gallois S, Duda R, Reyes-García V. Local ecological knowledge among Baka children: a  
806 case of “children’s culture”? *J Ethnobiol.* 2017; 37(1): 60–80. doi: 10.2993/0278-0771-  
807 37.1.60.
- 808 74. Quinlan M. The free-listing method. In: Liamputtong P, editor. *Handbook of research*  
809 *methods in health social sciences.* Singapore: Springer International; 2017. pp. 1–16.
- 810 75. Gallois, S, Heger, WT, van Andel, TR, Sonké, B, Henry, AG. Comparing apples and pears:  
811 The hidden diversity of the Central African bush mangos (Irvingiaceae). *Econ Bot.* 2020;  
812 74(2): 178-194. doi: 10.1007/s12231-020-09497-x.
- 813 76. Billong Fils PE, Afiong Nana N, Betti JL et al. Ethnobotanical survey of wild edible plants  
814 used by Baka people in southeastern Cameroon. *J Ethnobiol Ethnomed* 2020; 16:64 [doi:](https://doi.org/10.1186/s13002-020-00413-0)  
815 [10.1186/s13002-020-00413-0](https://doi.org/10.1186/s13002-020-00413-0).
- 816 77. Miranda TM, de Mello Amaro MC, Govone JS, Miranda DM. The influence of visual  
817 stimuli in ethnobotanical data collection using the listing task method. *Field Methods.* 2007;  
818 19: 76–86. doi: 10.1177/ 1525822X06295987.
- 819 78. Ong HG, Kim YD. The role of wild edible plants in household food security among  
820 transitioning hunter-gatherers: evidence from the Philippines. *Food Secur.* 2017; 9: 11–24.  
821 doi: 10.1007/s12571-016-0630-6.

822 79. Setalaphruk C, Price L. Children's traditional ecological knowledge of wild food resources:  
823 a case study in a rural village in Northeast Thailand. *J Ethnobiol Ethnomed*. 2007; 3(1): 33.  
824 doi: 10.1186/1746-4269-3-33.

825 80. Crittenden AN, Conklin-Brittain NL, Marlowe FW, Schoeninger MJ, Wrangham R.  
826 Foraging strategies and diet composition of Hadza children. *Am J Phys Anthropol*. 2009;  
827 138(S48): 75–281. doi:10.1002/ajpa.21030.

828

## 829 **Supporting information**

830 **Supplementary Table 1. Wild edible plants reported during the walk-in-the-woods, free**  
831 **listing and dietary recalls in Le Bosquet and Kungu, southeast Cameroon.**

832

833 **Supplementary File 1. Data collection protocol for *ex-situ* interviews and *in-situ* interviews.**

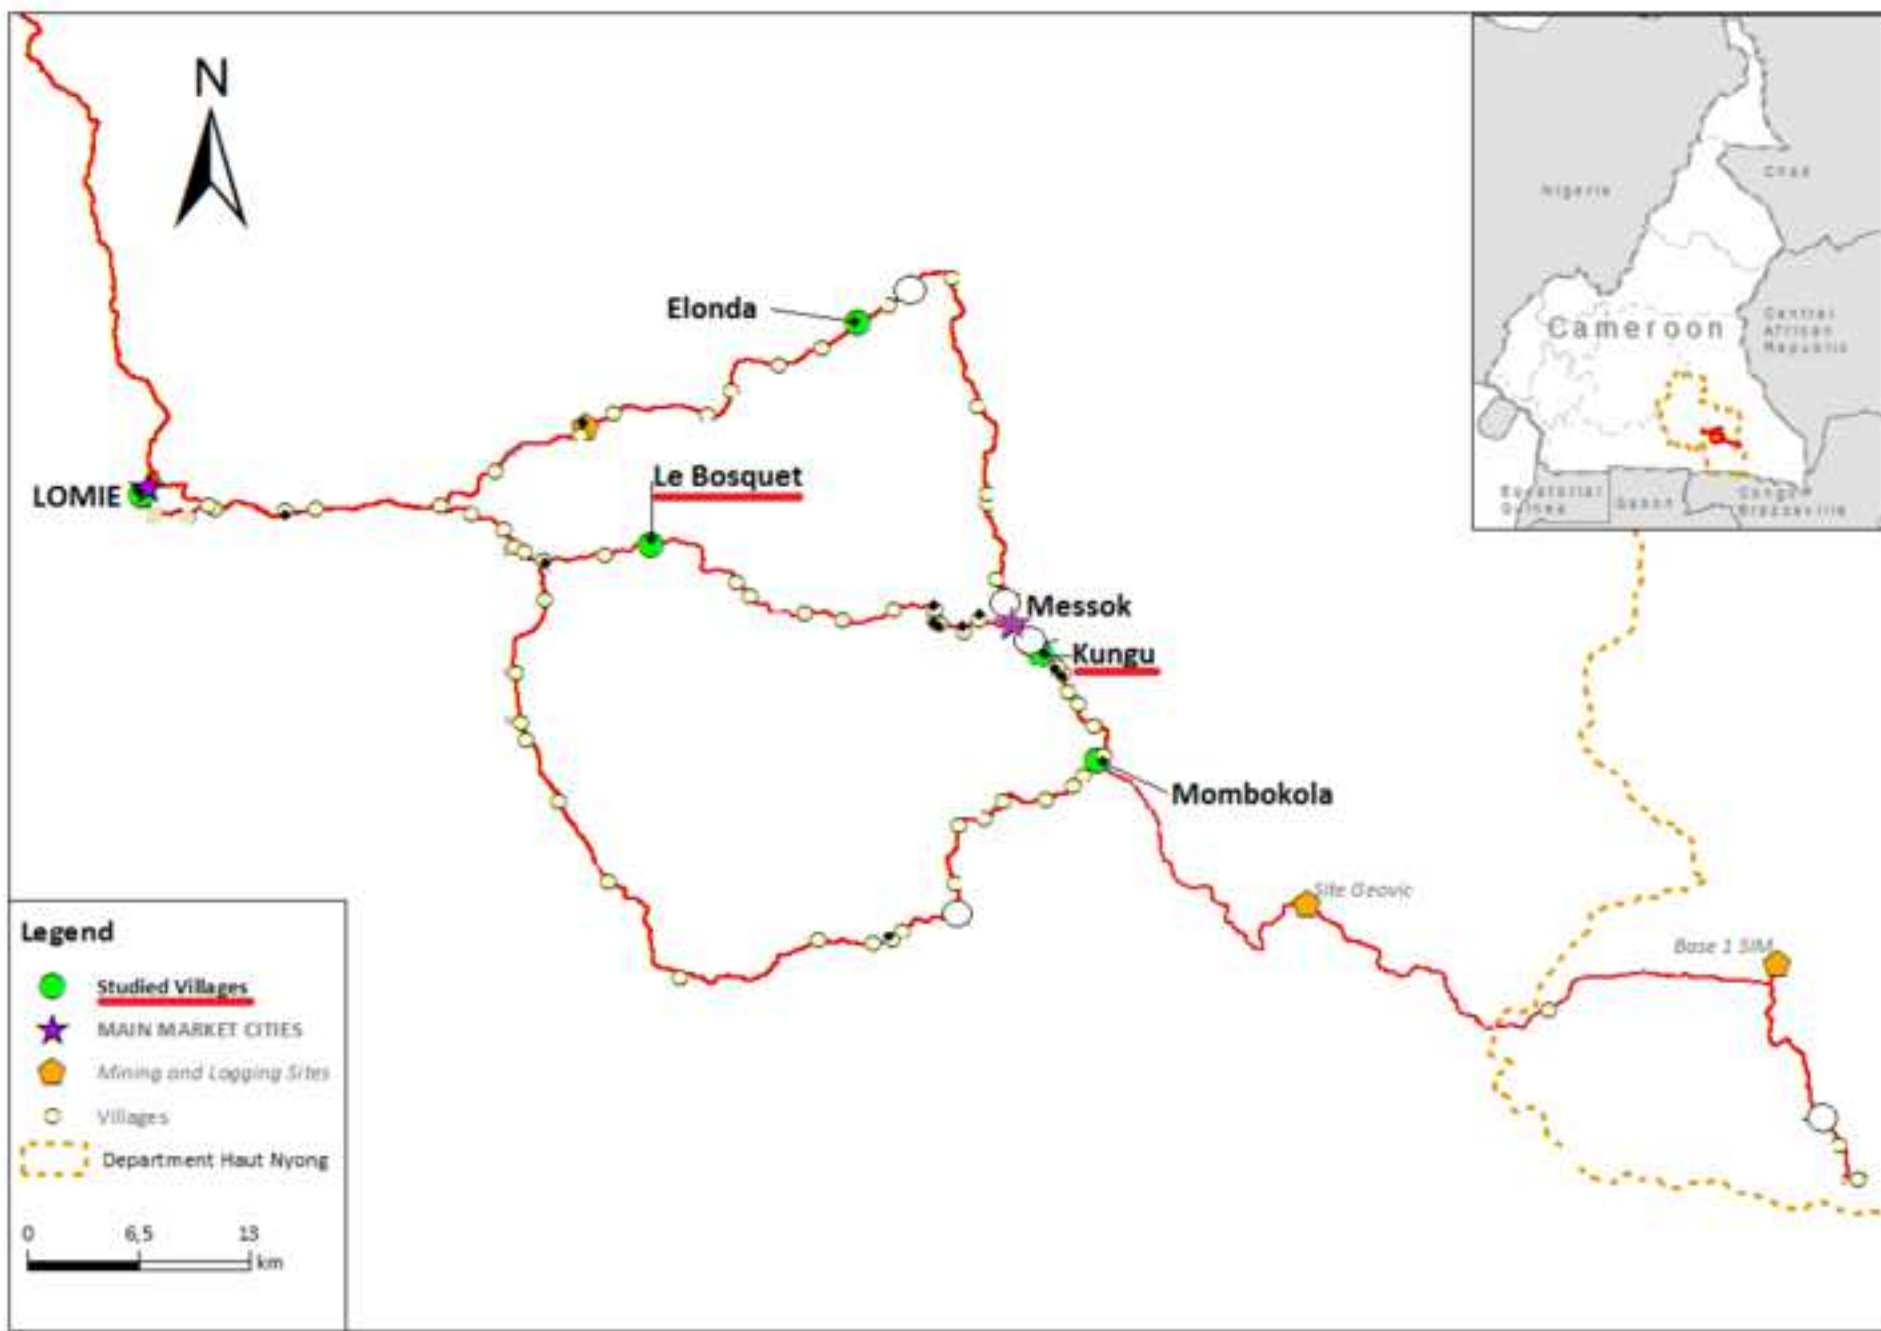



Figure 2

[Click here to access/download;Figure;Fig2.tif](#)

Arri're-plan

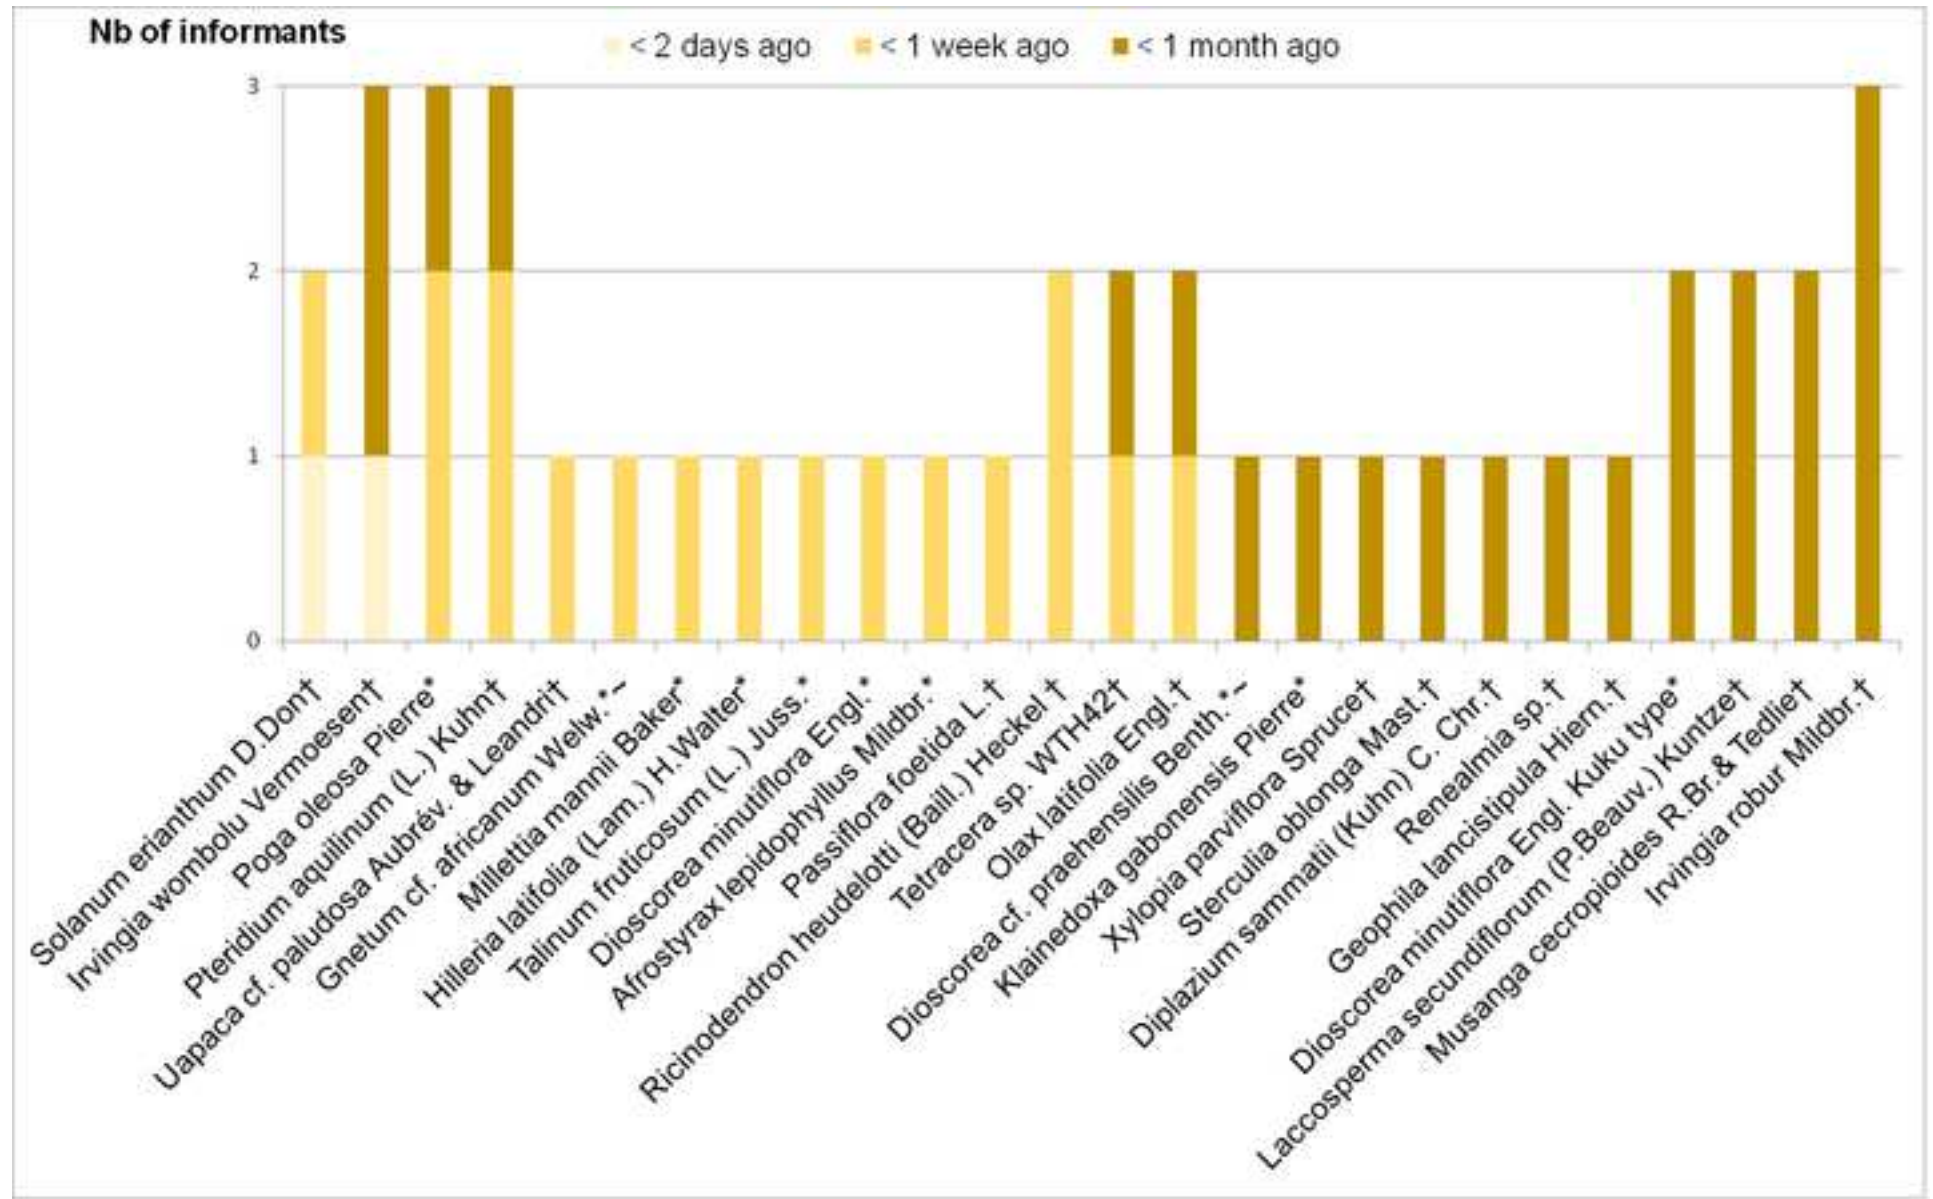

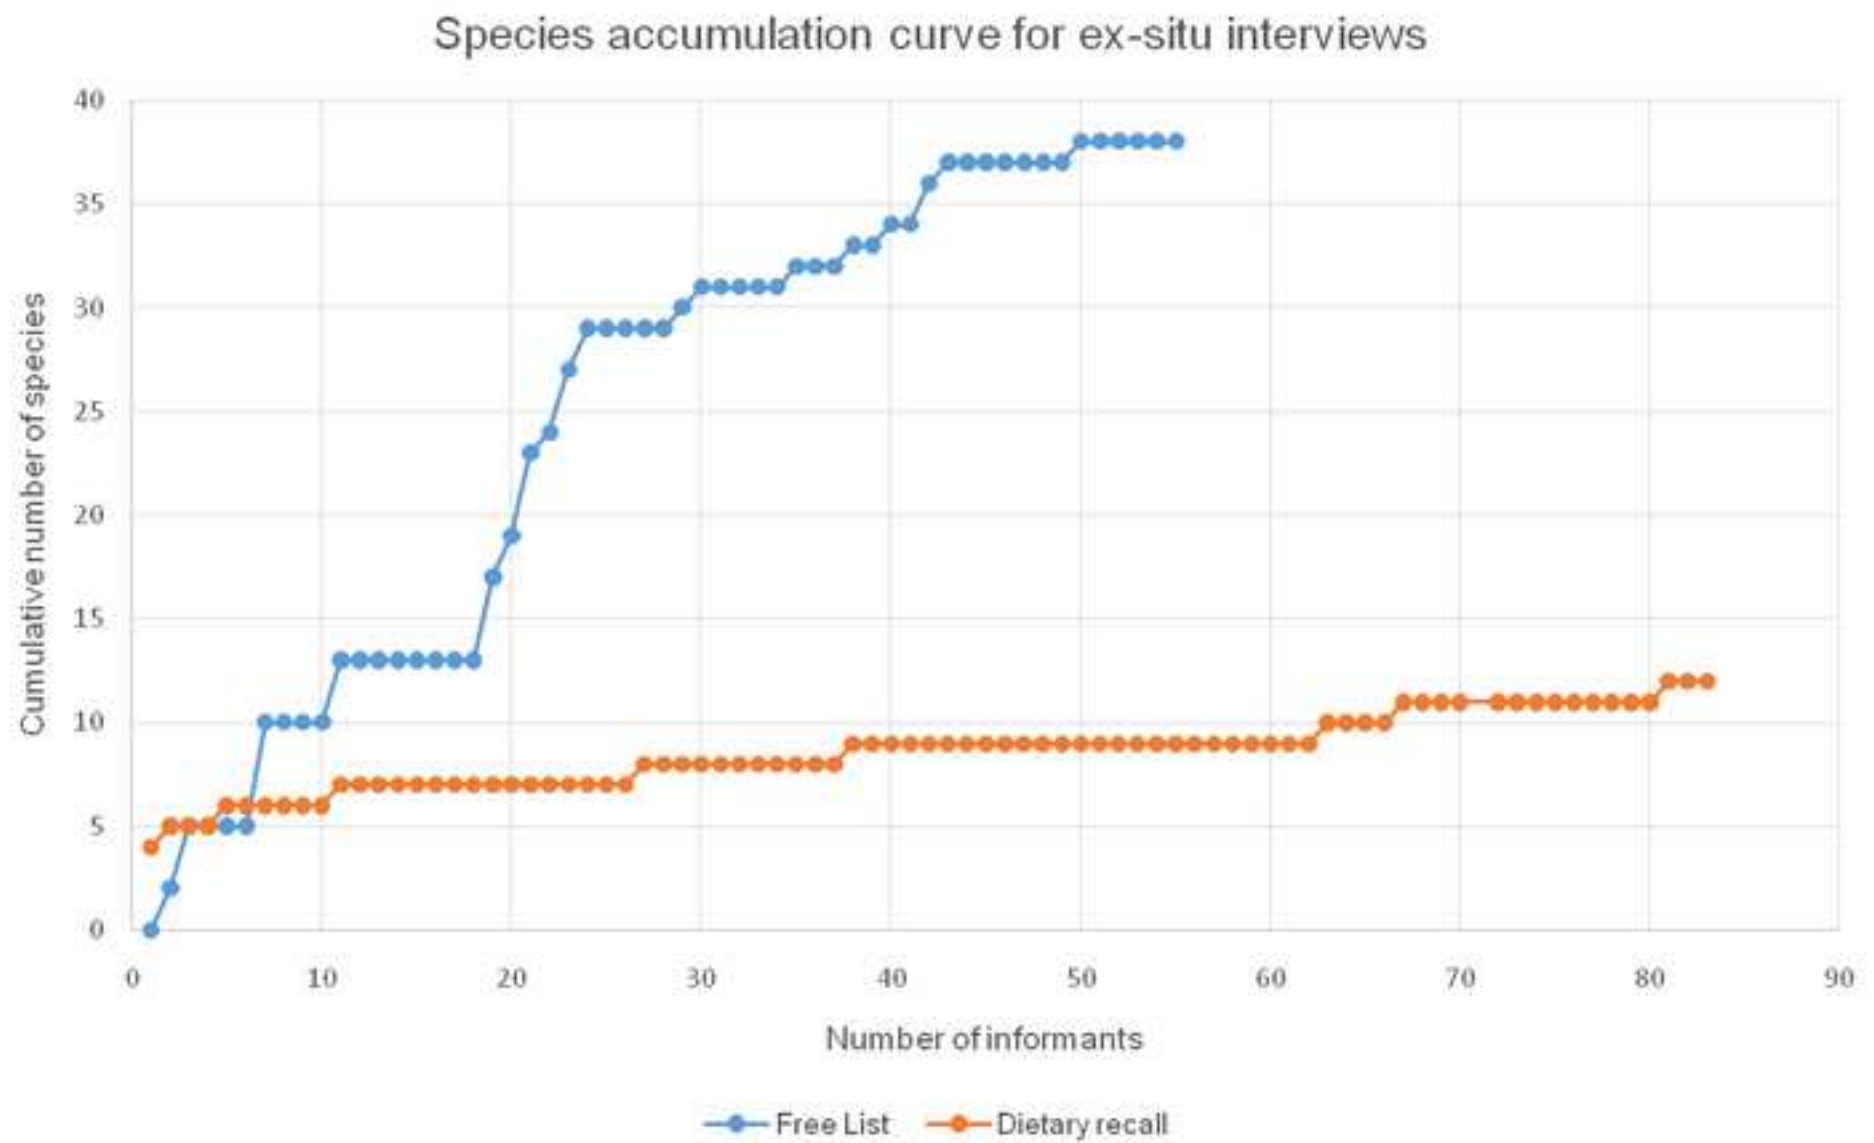

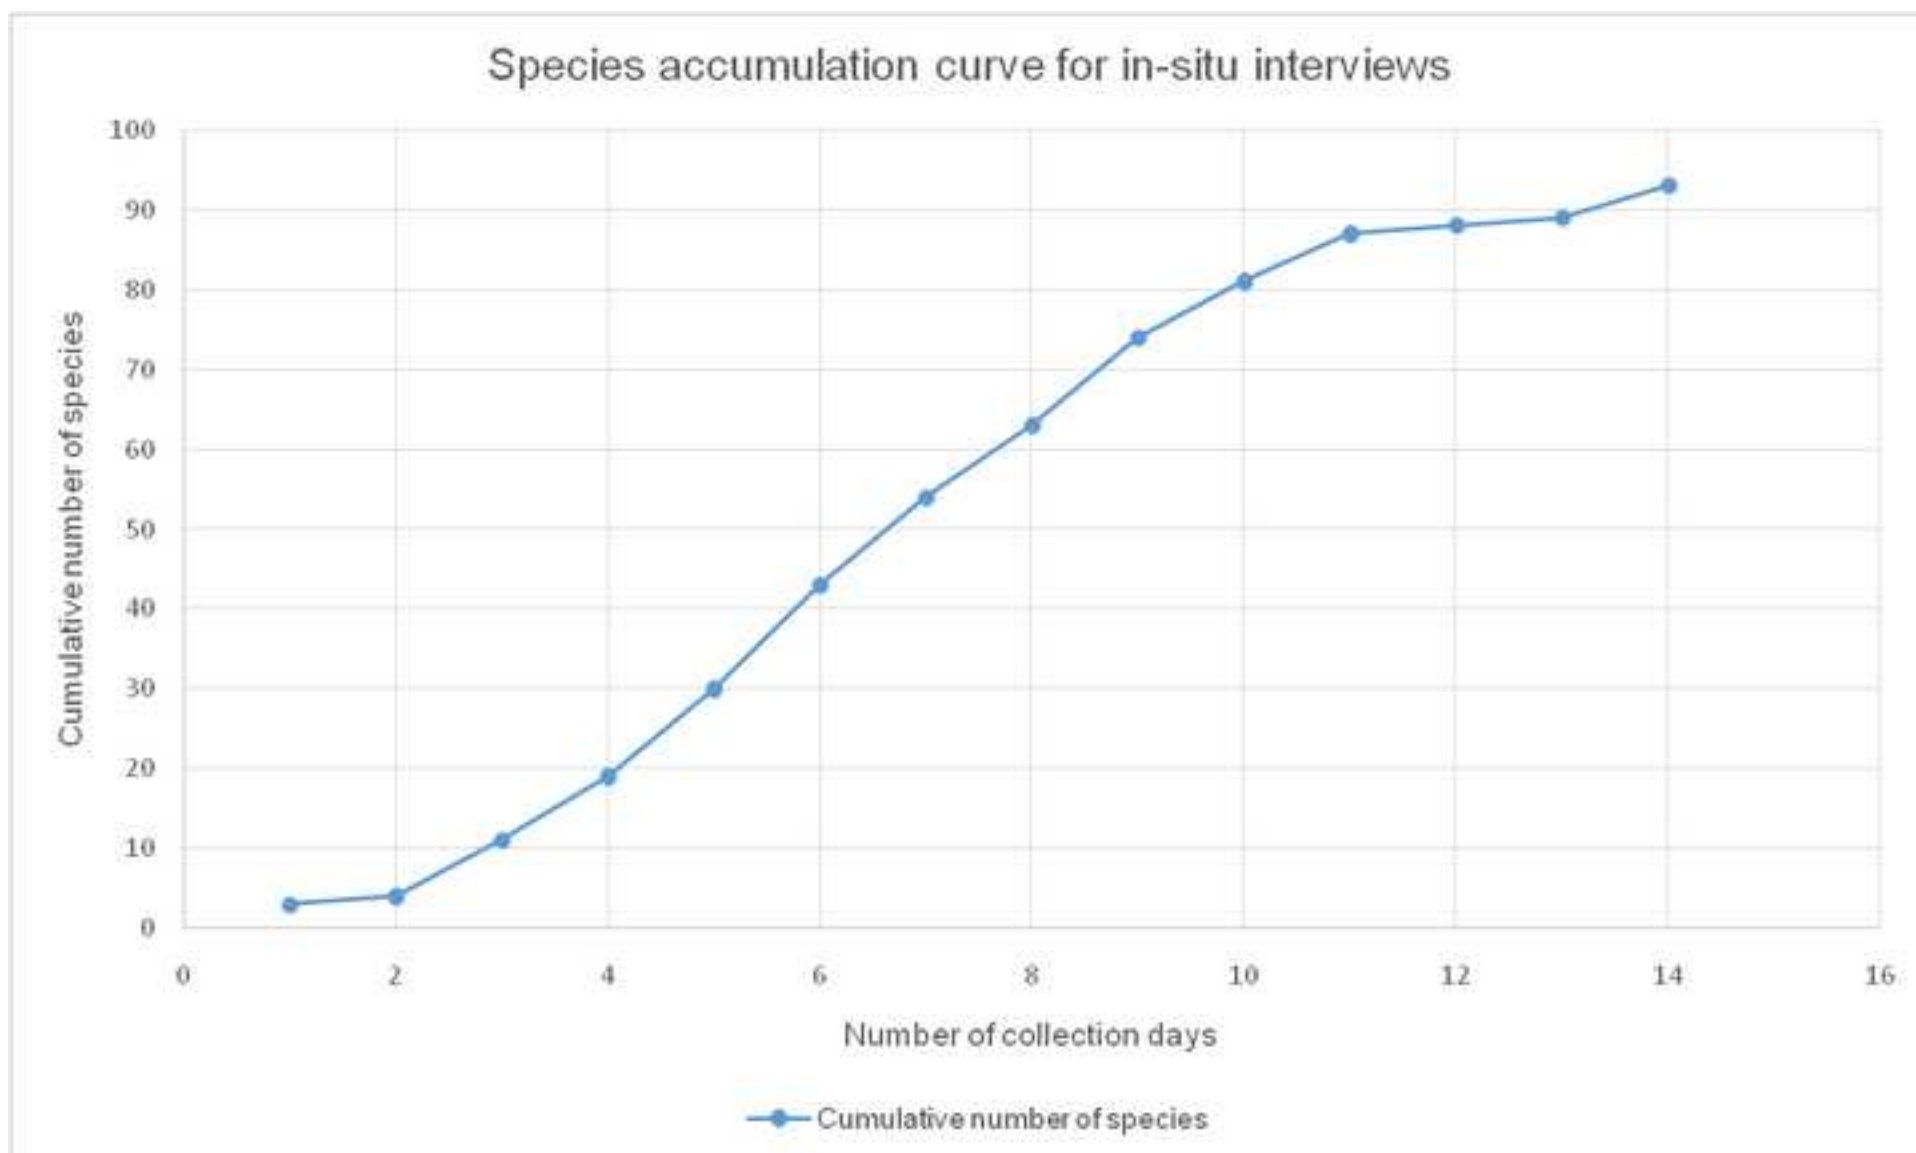

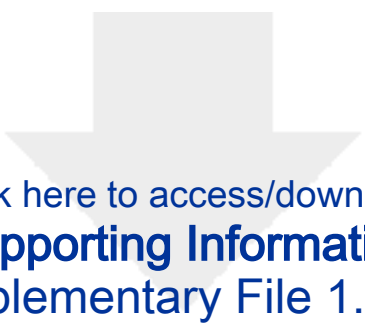

Click here to access/download  
**Supporting Information**  
Supplementary File 1.docx



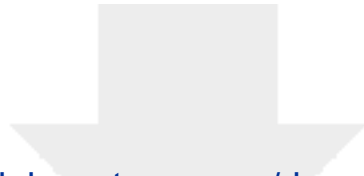

Click here to access/download  
**Supporting Information**  
Supplementary Table 1.xlsx

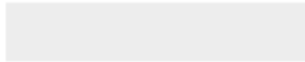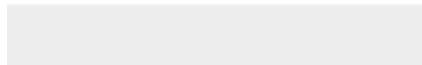

1 ~~Importance~~ The importance of choosing appropriate  
2 methods for assessing wild food plant knowledge and use: a  
3 case study among the Baka in Cameroon.

4

5 **Short title:** Choosing ~~the~~ appropriate methods for assessing wild food plant knowledge.

6

7 Sandrine Gallois<sup>1\*</sup>, Thomas Heger<sup>2</sup>, Amanda G. Henry<sup>1</sup>, and Tinde van Andel<sup>2,3</sup>

8

9 <sup>1</sup>Faculty of Archaeology, Leiden University, Leiden, the Netherlands

10 <sup>2</sup>Biosystematics Group, Wageningen University, Wageningen, the Netherlands

11 <sup>3</sup>Naturalis Biodiversity Center, Leiden, the Netherlands

12

13 \*Corresponding Author:

14 Sandrine Gallois

15 Faculty of Archaeology, Leiden University, Leiden, the Netherlands

16 Email ~~address~~: galloissandrine.ethnoeco@gmail.com

17

18 **Abstract**

19 In tropical rainforests, access to and availability of natural resources are vital for the dietary  
20 diversity and food security of forest-dwelling societies. In the Congo Basin, these are challenged  
21 by the increasing exploitation of ~~the~~ forests for bushmeat, commercial hardwood, mining, and  
22 large-scale agriculture. In this context, a balanced approach is needed between ~~among~~ the  
23 pressures from forest exploitation, non-timber forest product (~~NTFP~~) trade and the livelihood  
24 and dietary behavior of rural communities ~~is needed~~. While there is a general positive association  
25 between forest tree cover and dietary diversity, the complex biocultural interactions between  
26 tropical forest food resources and the communities they sustain ~~is are~~ still understudied. This  
27 research focuses on the knowledge and use of wild food plants ~~among by~~ the forest-dwelling  
28 Baka people in southeast Cameroon. By using two different sets of methods, namely *ex-situ*  
29 interviews and *in-situ* surveys, ~~we we~~ collected ethnographic and ethnobotanical data ~~among~~  
30 in two Baka ~~communities settlements and in southeastern Cameroon. We aimed to explore~~ the  
31 diversity of wild edible plants (~~WEP~~) known, the frequency of their consumption, and ~~the~~  
32 potential conflicts between local diet and commercial trade in forest resources. Within a single  
33 Baka population, ~~We we~~ showed that ~~within a single population, when data on consumption~~  
34 ~~frequency are collected during~~ the *in-situ* walk-in-the-woods method, ~~it results resulted~~ in more  
35 detailed information ~~of on WEP wild food plant~~ knowledge and use frequency than ~~do the ex-~~  
36 *situ* methods of freelifting ~~or and~~ dietary recalls. Our *in-situ* method yielded 91 wild edible species  
37 ~~of WEP~~, much more than the *ex-situ* ~~methods of~~ freelifting interviews (38 spp.) and dietary recalls  
38 (12 spp.). Our results ~~implies suggest~~ that ~~previous studies in the Congo Basin that are~~ based only  
39 on *ex-situ* ~~surveys interviews~~ may ~~have underestimated~~ the importance of WEP wild food  
40 plants for local communities. We discuss ~~on~~ the limitations and strengths of these different

Formatted: Font: Not Italic

Formatted: Font: Italic

Formatted: Font: Italic

41 methods for capturing the diversity of ~~WEP-wild food plant~~ knowledge and uses ~~and~~. We propose  
42 that future studies on ~~WEP-wild food plant~~ knowledge and use frequency should rely on a mixed  
43 approach, ~~that combining combines~~ *in-situ* and *ex-situ* methods.

44

## 45 **Introduction**

46 In tropical rainforests, access to and availability of natural resources are vital for the dietary  
47 diversity and food security of forest-dwelling societies. The Congo Basin includes the largest  
48 tract of tropical rainforest in Africa. This highly biodiverse region is inhabited by more than 30  
49 million people, including forest-dwelling communities that strongly depend on their natural  
50 environment for their survival [1]. A wide variety of wild edible plant species (WEP) has been  
51 reported for the Congo Basin, among Bantu-speaking farmers and especially among hunter-  
52 gatherers that infrequently practice agriculture [2, 3, 4, 5, 6]. Local people ~~mainly~~ harvest these  
53 wild food plants ~~mainly~~ for subsistence use within the household, but a substantial number of  
54 species is locally traded, and a few find their way to global markets [7,8]. The cash income  
55 earned with the trade in non-timber forest products (NTFPs), important ~~in-for~~ improving  
56 livelihoods, can empower local communities [9]. Wild edible plants ~~may~~ also provide a safety  
57 net in times of agricultural shortage and are ~~therefore-thus~~ essential for food security [9].  
58 However, ~~the access to and availability of natural resources for forest dwelling societies in the~~  
59 ~~Congo Basin forest-dwelling societies in the Congo Basin~~ are challenged by ~~a decrease in access to~~  
60 ~~and availability of wild food resources due to~~ the increasing exploitation of the forests for  
61 commercial hardwood, precious minerals, and space for oil palm and rubber plantations [10,11].  
62 As a result of large-scale agricultural encroachment, logging, mining and hunting activities, the



63 ecosystems of this region are under severe pressures[12, 10, 12]. A recent survey estimated that  
64 just 70% of the standing forests of the Congo Basin remain fully intact [11]. Pressures on local  
65 resources have led to a decrease in local people's access to the important wild plants and  
66 bushmeat, ~~that which~~ contributes substantially to their diet and medicine [13,14]. In Cameroon,  
67 for example, more than 60% of the top 23 timber species exported from the country also yield  
68 important NTFPs for local people. A balanced approach is needed between tropical hardwood  
69 exploitation and the livelihoods of rural communities, ~~foris needed, for~~ which the development  
70 and implementation of sustainable forest management plans are essential [9].

71  
72 Although the value of local ecological knowledge ~~in~~ for informing conservation and  
73 environmental management is well established [15, 16, 17] and there is a general positive  
74 association between forest tree cover and dietary diversity [18], the complex biocultural  
75 interactions between tropical forest food resources and the communities they sustain ~~is~~ are still  
76 understudied [19, 10, 19]. According to Ngome et al. [20], in most poor communities in the  
77 Congo Basin, the wide variety of nutrient-rich, wild edible plants are underutilized, either due to  
78 ignorance, shame or misconceptions about these foods. ~~They pointed out that e~~ Ethnobotanical  
79 studies have so far insufficiently provided evidence ~~on~~ for the intake, quality and nutritional  
80 impacts of WEPs, their contribution to the overall diet and ~~whether they~~ their role in ensure  
81 ensuring food security [20]. Considering the increasing ~~lye~~ conflicting conflicts of interests ~~in~~  
82 regarding the use of wild resources, accurate assessments of local uses and dependency on wild  
83 plants and animals are necessary ~~in order~~ to evaluate the effects of commercial forest  
84 exploitation on both biodiversity and local livelihoods. The aim of this research was to explore  
85 the diversity of wild edible plants known and used among ~~by~~ the forest-dwelling Baka people in

86 southeast Cameroon. We also evaluated the frequency of their consumption, potential conflicts  
87 between local diet and commercial trade in forest resources, and the different field methods to  
88 assess of WEP knowledge and consumption.

89  
90 The Baka are Ubangian-speaking forager-horticulturalists, formerly referred to as ‘Pygmies’  
91 [21]. Until roughly 50 years ago, ~~the~~ Baka were nomadic foragers, ~~who relying-relied on~~  
92 hunting, fishing, gathering, and the exchange of NTFPs for agricultural crops with their  
93 neighbors, Bantu-speaking farmers [22]. Since the 1960s, the Baka have been facing several  
94 changes in their livelihood. Due to missionary activities and a government program of  
95 sedentarization, they have progressively left their forest camps and settled in villages along ~~the~~  
96 logging roads [23]. Nowadays, Baka livelihood is mostly based on the combination of foraging  
97 activities, agricultural work in their own fields and wage labor on Bantu farms or for logging  
98 companies [22]. ~~The~~ re settlement programs, which included displacement from protected areas  
99 and forced sedentarization, have had drastic effects on Baka livelihood and well-being. Increased  
100 alcohol abuse, ~~the~~ a loss of traditional knowledge, and an increasing destabilization of their  
101 natural environment have led to the marginalization of the Baka and ~~an~~ their increased  
102 dependence on other ethnic groups [24, 25]. To evaluate the Baka’s reliance on their surrounding  
103 forests in ~~the~~ if current situation, it is essential to assess not only their knowledge on wild food  
104 plants, but also their actual use and commercialization of these species.

105  
106 Local knowledge and use of plants are assessed through different ethnobotanical methods, of  
107 which the interview is the most widely used. Interview methods vary considerably between  
108 studies and are deployed based on the research question addressed [26]. Freelisting is a

109 frequently-used interview method, in which informants are asked to list all items they know  
110 within a given domain [27, 28]. This technique reveals cultural salience and variations in  
111 individuals' topical knowledge [29], and results in a shortlist of highly valued plants [30, 31]. As  
112 freelisting ~~allows-enables~~ the collection of data from a large number of informants in a limited  
113 amount of time [32], this method is frequently used as a starting point for studying traditional  
114 plant knowledge. Local names of plants listed during the freelisting interviews are identified  
115 afterwards by collecting voucher specimens for these names. The resulting dataset is then used to  
116 draw conclusions about plant knowledge of a certain group of people and/or the potential  
117 contribution of wild plants to their diet [30, 33]. Organizing field trips to collect herbarium  
118 specimens of species mentioned during freelisting exercises is often (inaccurately) called the  
119 'walk-in-the-woods method' [34, 35]. However, this technique, first coined by Phillips and  
120 Gentry in 1993 [36], implies that participants are encouraged to actively lead field trips and point  
121 out all useful plants they know and/or use [26], instead of only ~~searching-helping the researcher~~  
122 ~~search~~ for specimens that ~~appear can be linked to on~~ the ~~list of~~ local names ~~derived~~  
123 ~~from mentioned during~~ interviews. Data elicited from freelisting appear to be specific to the  
124 context in which they were collected (e.g., in the village), creating an unintended but significant  
125 bias in this type of ethnobotanical research [27, 32, 37]. Gathering the data during *ex-situ*  
126 interviews, for example in people's home, away from the ecological context in which people  
127 collect their plants, may result in lists of only the most salient plant species. Furthermore, the  
128 success of freelisting depends on the informants' correct understanding of the category or  
129 cultural domain (e.g., wild food plants) under discussion [28, 29, 38].

130

131 In societies that undergo rapid socio-economic changes, people become more integrated into the  
132 market economy, change their lifestyle and adopt cultivated or processed substitutes for wild  
133 plants in their diet [39]. This creates a gap between people's ethnobotanical knowledge and their  
134 actual use of plants [40, 41]. A discrepancy between the number of useful species known and  
135 those actually used indicates that elders who still know how plants were used in the past do not  
136 practice this any longer, and infrequently transfer their skills to the next generation [40].

137 Freelisting exercises often focus on people's knowledge [40], while recall surveys, developed by  
138 social anthropologists for understanding time allocation [42], lead informants to enumerate what  
139 they have done during a specific period of time. For instance, dietary recall surveys have been  
140 developed to estimate the proportion of different food items in people's diet (e.g., [43]). Recently,  
141 dietary recalls were introduced in ethnobotanical ~~approach studies~~ to assess local uses of plants  
142 [44, 45], while income recall surveys have been used ~~for to assessing~~ the contribution of the sale  
143 of different forest products ~~in to~~ local livelihoods [46].

144 Although many studies reported a high diversity of wild edible plant species worldwide [47, 48],  
145 research relying on dietary recalls has resulted in surprisingly low numbers of wild species  
146 actually being consumed [49, 50]. Dietary recalls carried out in the Democratic Republic of the  
147 Congo (DRC) also showed that wild plants did not contribute substantially to rural and urban  
148 women diets [51]. Likewise, the dietary recalls that we recently held among the Baka ~~resulted~~  
149 ~~in reported~~ only 15 wild edible species ~~being reported~~ [52], which is much less than the list  
150 provided recently in the northern Congo area [53] and in stark contrast to the extensive wild  
151 plant knowledge documented almost three decades earlier by ~~anthropologists [2] and~~  
152 ~~[3]~~ among the same ethnic group [2, 3]. Like freelisting, dietary recalls are limited by the subject's  
153 memory [54] and may therefore underreport plant use.

154  
155 Whether the limited amount of WEP listed by the Baka was a result of a general loss of  
156 traditional plant knowledge, a change in food preferences or the effect of the assessment  
157 methods, was essential to contextualize our findings. In this study, we explored how different  
158 ethnobotanical methods captured the diversity of wild edible plant knowledge and use ~~among~~in  
159 Baka community. We aimed to answer the following questions:  
160 1) Which wild edible plants (WEP) are known and used by the Baka?  
161 2) What are the most frequently consumed WEP species among the Baka?  
162 3) ~~May-Do~~ commercial logging and NTFP trade affect the availability of wild food plants?  
163 4) How do different methods for assessing WEP use vary in their results?

164

## 165 **Materials ~~&~~and Methods**

### 166 **Study site**

167 We collected data on wild food plants in two Baka settlements: Le Bosquet  
168 (3°07'38''N 13°52'57''E) and Kungu (3°02'40"N 14°06'57''E), Haut Nyong division,  
169 southeastern Cameroon. ~~Both~~The two settlements, which belong to the same population of Baka  
170 hunter-gatherers, are both located at least eight hours by car from the capital Yaoundé, of which  
171 four hours ~~are~~ on unpaved logging roads (Fig 1). The accessibility of this area highly depends on  
172 the weather, as the road quickly deteriorates during the rainy season. The area is covered by a  
173 mixture of evergreen and moist semi-deciduous forest within altitudinal ranges of 300–600  
174 meters [55]. In populated areas, the forest cover is largely removed in favor of settlements, cocoa  
175 plantations, logging activities and small-scale agriculture. This creates a mosaic of dense primary

176 forest, selectively logged primary forest, secondary forest and agricultural fields, interspersed  
 177 with trails. The climate of the region is tropical humid, with a major rainy season between late-  
 178 August and late-November and a major dry season between late-November and mid-March. The  
 179 annual precipitation reaches about 1500 mm and the average temperature is 25°C [55].

180  
 181

182 **Fig 1. Map of the study area**

Formatted: Font: Bold

183

184 Before data collection, Free Prior and Informed Consent was obtained from all participants. This  
 185 study adheres to the Code of Ethics of the International Society of Ethnobiology  
 186 [56], and received approval from the ethics committee of Leipzig University (196-16/ek) and the  
 187 Ethical Committee from the Ministry of Health of Cameroon  
 188 (n°2018/06/1049/CE/CNERSH/SP).

189 For our inventory of wild food plant knowledge, use and commercialization, we used a  
 190 combination of four different datasets, obtained from *ex-situ* interviews (freelisting, dietary  
 191 recalls and income recalls) and *in-situ* ethnobotanical forest surveys ('walk-in-the-woods'  
 192 method). We collected data in the two Baka settlements in 2018 and 2019, during three different  
 193 fieldwork periods, to cover variations in wild fruit availability (Table 1).

194

195 **Table 1. Datasets, fieldwork periods and the different Methods-methods used to assess wild**  
 196 **food plant knowledge, consumption and commercialization among the two Baka**  
 197 **settlements Le Bosquet and Kungu. \* Only data regarding bush mango (*Irvingiaceae*)**

Formatted: Font: Bold

Formatted: Font: Bold

|                  |            |           |           |  |
|------------------|------------|-----------|-----------|--|
| Fieldwork period | Feb.-March | Oct.-Nov. | April-May |  |
|------------------|------------|-----------|-----------|--|

|                                                                      | 2018                | 2018                  | 2019                |                                      |
|----------------------------------------------------------------------|---------------------|-----------------------|---------------------|--------------------------------------|
| <u>Datasets and Methods</u><br><u>(number of participants)</u>       | major dry<br>season | major rainy<br>season | minor dry<br>season | Data published<br>earlier by authors |
| <u>1.</u> Freelisting(n=55)<br><i>ex-situ</i>                        | x                   |                       |                     | [52]                                 |
| <u>2.</u> Dietary recalls (n=83)<br><i>ex-situ</i>                   | x                   | x                     | x                   | [52]                                 |
| <u>3.</u> Income recalls (n=73)<br><i>ex-situ</i>                    | x                   | x                     |                     | [52]                                 |
| <u>4.</u> Walk-in-the-woods survey<br>14 days (n= 20) <i>in-situ</i> |                     |                       | x                   | [71]*                                |

\* Only data regarding bush mangoes (Irvingiaceae).

### **Data collection: *ex-situ* interviews**

All data were collected among Baka individuals of 18 years and older. We included all individuals who were present in the settlement and willing to participate. While we aimed to get a gender- and age-balanced sample, we did not exclude any potential participants. All *ex-situ* interviews were held in the French and Baka language by the first author with the assistance of a local research assistant-interpreter. During the 55 freelisting exercises, we asked 24 men and 31 women in the two Baka villages (~~belonging to 51 different households~~: 29 in Le Bosquet, 26 in Kungu, belonging to 51 different households) to report all WEPs they knew [52]. Because no specific term exists in Baka language that refers to ‘wild edible plant’, we asked them: “Which

Formatted: Font: Italic

209 food from the forest, excluding game, honey and mushrooms, do you know?" ([Supplementary](#)  
210 [File 1](#)).

211 To gather data on the actual consumption of wild food plants and their importance in Baka diet,  
212 we conducted a dietary recall protocol that we adapted from the FAO Guidelines for Assessing  
213 Dietary Diversity [52, 57]. Participants were asked to list all items they had consumed within the  
214 previous 24 hours, and to mention the origin of each food item (from the wild, from agricultural  
215 fields or bought at the market). A total of 143 dietary recall interviews were conducted in the two  
216 settlements among [83 individuals](#): 35 men and 48 women (38 in Le Bosquet and 45 in Kungu),  
217 belonging to 66 different households): 42 individuals were interviewed once, 22 twice and 11  
218 three times ([Supplementary File 1](#)). A detailed account on the outcomes of the freelisting and  
219 dietary recalls with regard to cultivated and shop-bought food, preferences and perceptions of  
220 wild vs. cultivated food was published ~~in~~ [earlier](#) [52].

221 To collect data on wild food plants that were commercialized (either traded as timber or as  
222 NTFP), we conducted a 14-day recall survey on the income received through sale, asking ~~our~~  
223 [73](#) participants to list all the items they had sold during this time period [58]. A total of 114  
224 interviews were conducted with 43 women and 30 men (34 individuals in Le Bosquet and 39 in  
225 Kungu): 32 individuals were interviewed once and 41 twice ([Table 1](#)). Part of the *ex-situ*  
226 interviews were repeated in other parts of the year to verify whether the consumption and/or  
227 commercialization of WEP changed according to the season. None of the three *ex-situ* interview  
228 methods were based on a predefined set of species. We did not use pictures of wild food plants,  
229 fresh samples or other visual stimuli, and neither gave prompts after informants had listed a  
230 certain ~~amount~~ [number](#) of plants.

231



## Data collection: *in-situ* walk-in-the-woods survey

Formatted: Font: Italic

From the local (Baka) names mentioned during the three *ex-situ* interview methods, we constructed a preliminary database of 'folk taxa' of wild plants consumed by the Baka, with tentative scientific names retrieved from literature on Central African wild food plants (e.g., [2, 3, 6, 59]) and earlier ~~ethnographic and ethnoecological research~~ data collected between 2012 and 2014 among the Baka by the first author [22] during ca. 18 months of fieldwork ~~spent~~ in the Baka settlements, ~~where she collected ethnographic and ethnoecological data~~ [22]. During our last fieldwork period (2019), we carried out a walk-in-the-woods survey to obtain botanical specimens to match the Baka names of wild food taxa in our preliminary database, but also to verify whether the Baka knew, consumed or traded more plant species than they mentioned previously during the *ex-situ* interview sessions. Therefore, we asked the Baka to suggest several people of different ages and gender who were knowledgeable on wild edible plants and would agree to join us on our collection trips. We worked with one to four informants on each collection day. In total, we worked with 20 individuals (~~they were~~ 10 women and 10 men), aged between 29 and 80 years, of which nine had participated previously in the *ex-situ* interviews (two in the dietary and the income recalls; two only in the free listing; five in all three methods). During 14 collection days into the area surrounding Le Bosquet and Kungu, we searched for ~~the species plants that matched~~ ~~on~~ our preliminary list of folk taxa, but also asked our informants to point out any other edible ~~plant species~~ they saw (Supplementary File 1). When such a ~~wild edible~~ plant was encountered, we collected herbarium material using standard botanical methods [27]. Fieldtrips lasted from 7:00 am to 15:00 pm, but the distance covered differed per day, as it depended on the number of plants collected. Many more species were collected in the first few days close to the village, while on the last days, several hours were spent walking to collect rare

255 edible plants. We paid particular attention to clarify information on Baka folk taxa that consisted  
256 of more than one botanical species. For most specimens we collected, we asked our informants  
257 for 1) the local name (in Baka, French and/or Nzimé, the Bantu language in this area, if known);  
258 2) plant part(s) used; 3) preparation and application methods; 4) when they had last consumed  
259 the plant; 5) whether a part of the plant was sold; 6) in the case of trees, whether the wood was  
260 commercially logged. We did not limit our ethnobotanical data to plant uses that were shared  
261 among our informants, but were keen to record differences in food plant knowledge,  
262 consumption frequency and appreciation of wild edibles among informants.  
263 Duplicates of voucher specimens were deposited at the National Herbarium of Cameroon (YA)  
264 and at the herbarium of Naturalis Biodiversity Center (L). A third voucher was kept at the study  
265 site to verify local names and uses with Baka villagers during group discussions. Plant  
266 identification took place at Naturalis, using Central African herbarium specimens and literature,  
267 such as the Flora of West Tropical Africa [60], the Flore du Cameroun [61], [and monographs on](#)  
268 [the tropical African flora](#) [62, ~~63,~~ 64]. This literature was also used to verify the vegetation  
269 types in which these wild food plants occurred naturally. For species that were difficult to  
270 identify, we consulted botanical experts at Naturalis and abroad. Scientific names were updated  
271 using the [online](#) portal of Plants of the World Online [65].

272

## 273 **Data analysis**

274 We first analyzed the overall diversity of the WEPs reported and collected through the different  
275 methods. To assess the general characteristics of wild species consumed by the Baka,  
276 information on life form, part used, habitat and commercial timber was categorized in a  
277 spreadsheet, after which ~~pie charts were produced to show~~ the distribution of these traits [could be](#)

278 quantified. We ~~calculated-used~~ the Smith index [66] to assess the saliency of the plant species  
279 reported during the free listing interviews. To analyze the actual consumption of wild food plants  
280 reported during the dietary recalls, we calculated the citation frequency of the WEPs mentioned  
281 as eaten during the previous 24 hours. To analyze consumption data collected during the walk-  
282 in-the-woods survey, we categorized the respondents' answers in the following categories: 1)  
283 consumed today/yesterday; 2) 3-7 days ago, 3) 2-4 weeks ago; 4) 1-12 months ago; 5) 1-2 years  
284 ago; 6) > 2 years ago; and 7) never [52]. ~~A bar chart was produced to~~ We visualized the ranking  
285 of the most recently consumed species according to the walk-in-the-woods methods in a bar  
286 chart. We also calculated the most frequently sold WEPs from the overall list of plants reported  
287 as commercialized in the income survey.

288

289 In order to assess whether the full potential of the methods had been used (dietary recalls,  
290 freelisting and walk-in-the-woods), species accumulation curves [67] were produced by  
291 calculating the cumulative number of species that were reported after interviewing a certain  
292 number of informants (freelisting and dietary recalls) and after a certain amount of collection  
293 days (walk-in-the-woods method). Contrary to usual practice, data were not randomized before  
294 producing the curves, as several relevant features of the data would have been lost.  
295 Finally, in order to analyze conflicts between commercial timber harvesting and the availability  
296 of wild food plants for the Baka, we traced evidence of wild fruit trees felled by timber  
297 companies by counting the number of logged tree trunks along the forest trails and on logging  
298 trucks passing through the village during 14 days. We cross-referenced wild fruit trees species  
299 observed as felled logs and/or said to be cut for commercial timber with the CITES appendices  
300 [68] and the IUCN Red List [69] to assess their current conservation status.

301

## 302 **Results**

### 303 **Diversity of wild edible plants**

304 A total of 94 folk taxa of WEP were reported during the three different *ex-situ* interview methods  
305 and the *in-situ* walk-in-the-woods trips, corresponding to ca. 91 species. The exact number of  
306 species is unclear, as eight vouchers could only be identified to genus level and for several West  
307 and Central African *Dioscorea* species (wild yams), the taxonomic species delimitation is not  
308 clear [70]. Moreover, the Baka recognize different forms within individual yam species and thus  
309 some local names refer to the same botanical taxon. In the case of *D. minutiflora*, the Baka  
310 distinguish three distinct types: ‘njákákà’, ‘báloko’ and ‘kuku’, all with different leaf and tuber  
311 morphology. All local and scientific names of each wild edible species, used parts, preparation  
312 methods, and the method(s) through which they were recorded are listed in the [Supporting](#)  
313 [Information. Elementary Material.](#)

314 The 91 wild edible plant species belonged to 43 different plant families, of which the best  
315 represented were Dioscoreaceae (ca. 9 species of wild yams), Irvingiaceae (8 spp.),  
316 Anacardiaceae (5 spp., including 4 species of *Trichoscypha* fruits) and Zingiberaceae (5 spp. of  
317 *Aframomum*). Most [WEP species wild food plants](#) were trees (46%), followed by climbers (27%)  
318 including woody lianas and non-woody vines, herbs (19%), shrubs (7%) and ferns (1%). More  
319 than half (52.1%) of the wild edible plant species collected by the Baka naturally occurred in  
320 primary forest, 31.9% in secondary forests and the rest (16%) in open vegetation. We  
321 encountered very little primary forest that was untouched by loggers: the only patch of forest that  
322 did not show signs of commercial timber harvesting was dominated by

323 *Gilberiodendron dewevrei*, located at ca. two hours walking distance from Le Bosquet. The  
324 selectively logged primary forest, however, contained the majority of the fruit and seed  
325 producing primary trees and lianas sought after by the Baka.

326 Of the 94 folk taxa of ~~WEP~~ wild food plants, 38 were reported by the Baka during the free listing  
327 exercises. Initially, 51 local names were mentioned during these interviews, but 13 of those were  
328 later excluded because they were either synonyms of Baka plant names that had already been  
329 mentioned (three names) or they referred to wild mushrooms (two names), types of honey (six  
330 names) or cultivated plants (two names). The most salient WEPs (the most frequently listed first)  
331 emerging from the freelisting (Smith index > 0.1) were *Dioscorea burkilliana*, *D. praehensilis*, *D.*  
332 *cf. praehensilis* ('ba'), *Irvingia gabonensis*, *Baillonellatoxisperma*, and *Panda oleosa*. Of the 83  
333 participants of the dietary recalls, 69 reported having eaten wild plants, and mentioned a total of  
334 12 different species. Two species that emerged from the dietary recalls (*Amaranthus dubius* and  
335 *Raphia* sp.) were not mentioned during the freelisting.

336 ~~When assessing the WEP that emerged d~~ During the dietary recalls, ~~we found~~ 12 species of wild  
337 edible plants emerged, of which the most frequently eaten was *Gnetum cf. africanum* (mentioned  
338 in 50% of the interviews). The identification to species level of *Gnetum* was difficult due to the  
339 absence of flowering material from male and female individuals during the time of our botanical  
340 fieldwork survey. After *Gnetum* leaves, the second most often consumed were bush mango  
341 kernels (Irvingiaceae spp.; 22% of the interviews), *Raphia* palm wine (15%) and several species  
342 of wild yams (*Dioscorea* spp.; 15%). Detailed data on the contribution of WEPs to Baka diet,  
343 compared to cultivated crops and store-bought food ~~are were~~ published in earlier [52].  
344 During our walk-in-the-woods survey, much more WEP species were reported by the 20  
345 informants to have been recently eaten ~~by our informants~~. Of the 82 WEP species for which

Formatted: Font: Not Italic

346 we collected information on last consumption during the walk-in-the-woods survey, 26 were  
347 reported as consumed within the last month by at least one ~~of our 20~~ informants (Fig. 12). The  
348 most recently consumed was *Solanum erianthum*. ~~The the~~ bitter fruits of this ~~weedy~~ shrub were  
349 boiled with wild garlic bark (*Afrostryaxlepidophyllus*) and (cultivated) ~~hot~~ pepper (*Capsicum*  
350 *frutescens*) and taken as a hot drink to wake up in the morning. Moreover, 36 species were eaten  
351 within the last 12 months, 11 species between one and two years ago, eight species more than  
352 two years ago and one species was never eaten by any of our 20 informants (Fig 2). Of the 26  
353 species consumed within the last month, 23 would not have ~~been identified surfaced with from~~  
354 ~~the~~ dietary recalls only, and 16 would have been missed if only the freelisting and dietary recalls  
355 would have been ~~performed carried out~~. These 16 edible species ~~were included~~ two edible ferns  
356 (*Pteridium aquilinum* and *Diplazium sammatii*), three spices (*Xylopia parviflora*, *Olax latifolia*  
357 and *Ricinodendron heudelottii*), four fruits (*Passiflora foetida*, *Solanum erianthum*,  
358 *Musangacecropioides* and *Uapaca cf. paludosa*), the inner stem of *Laccospermum secundiflorum*,  
359 three seeds (*Sterculia oblonga*, *Irvingia robur* and *I. wombulu*), one root (*Renealmia* sp. WTH64),  
360 the potable water from the stem of *Tetracera* sp. (WTH42) and the leaves of  
361 *Geophilalancistipula*, eaten as a luck charm.

362  
363 **Fig 12. Wild edible species ~~that consumed by our the~~ 20 informants ~~consumed~~ within the past**  
364 **month.**

365 \*Species also reported ~~through during~~ freelisting;

366 ~Species also reported ~~through during~~ dietary recalls;

367 †Species ~~Species~~ not reported ~~either in during either~~ freelisting or dietary recalls.

368

Formatted: Font: Bold

Formatted: Font: Bold

## Plant parts used and preparation methods

Different parts of the wild food plants were eaten: most of them were fruits (37% of the species) and seeds (27%), followed by leaves (19%), tubers (12%), bark (5%) and exudate (1%). For 12 species, more than one part was consumed, such as fruits and seeds of *Aframomum* spp., *Irvingia gabonensis*, *Diospyros* cf. *crassiflora*, and *Baillonellatoxisperma*; fruits and stem sap of *Musangacecropioides* and *Chrysophyllum albidum*; fruits and leaves of *Piper umbellatum* and *Olax latifolia*; fruits and roots of *Dioscoreophyllum cumminsii*, and ~~both~~ bark and seeds of *Afrostryax lepidophyllus*. Most WEPs were integrated to cooked meals. ~~Only~~ only 36% of the 108 ~~plant~~-edible ~~plant~~ parts were eaten raw (Table 2), while ~~but~~ preparation methods of preparation depended on the part(s) consumed (Table 2).

**Table 2. Plant ~~species~~, parts eaten and preparation methods.** ~~\*Total number exceeds the 94 species, as some species yield more than one edible part.~~

| Part used            | Fruits | Leaves | Tubers | Seeds | Sap | Bark | Stem | Total |
|----------------------|--------|--------|--------|-------|-----|------|------|-------|
| Number of species    | 38     | 20     | 12     | 31    | 4   | 2    | 1    | 108*  |
| Eaten raw            | 31     | 1      | 0      | 3     | 4   | 0    | 0    | 39    |
| Eaten cooked         | 7      | 19     | 12     | 25    | 0   | 2    | 1    | 66    |
| Eaten raw and cooked | 0      | 0      | 0      | 3     | 0   | 0    | 0    | 3     |

~~\*Total number exceeds the 94 species, as some wild food species plants yielded more than one edible part.~~

Formatted: Normal

Formatted Table

387 The daily meal of the Baka was generally composed by two main dishes: a starchy basis and a  
388 stew with a fatty component, leaves, meat or fish. The carbohydrates provided by wild plants  
389 came predominantly from wild yams (*Dioscorea* spp.). The collection of these tubers ~~implied a~~  
390 ~~set of required~~ expert knowledge, as the Baka first verified whether the plant held tubers that  
391 were ready to be consumed, which ~~was done~~, in the case of *D. semperflorens* ~~was done~~, by  
392 examining the color of its leaves. The digging of the tubers required certain tools, like a wooden  
393 auger ~~for to removing remove~~ the soil and extracting the tuber without damaging it, a tool used  
394 specifically for both folk taxa of *D. praehensilis*. Once dug out, the tubers were washed and  
395 boiled. Some wild yams were only consumed occasionally as an emergency food, like ‘boli’  
396 (*Dioscorea* sp. WTH63), of which the name ~~means was translated as~~ ‘adulterer’, referring to the  
397 shame felt when eating ~~it this tuber~~. Other, occasionally consumed wild tubers ~~also~~ provided the  
398 Baka with carbohydrates, like those of *Palisota* cf. *barteri* and *Dioscoreophyllum cumminsii*.  
399 To accompany this starchy basis, the Baka prepared a stew in which leafy vegetables and  
400 condiments were combined with a fatty basis, mostly obtained from forest seeds. Fruits of  
401 *Irvingia* spp., *Baillonellatoxisperma* and *Panda oleosa* were gathered from the ground, and the  
402 kernels were taken out. Most seeds were prepared in a similar way: the kernels were dried and/or  
403 roasted, and then pounded and/or ground to a powder that was mixed into the stew. Seeds could  
404 also be conserved for some time in the form of a pressed, oily cake. ~~To the stew, it~~ leaves were  
405 ~~added that were~~ either cut into thin slices (~~for instancee.g., Gnetum cf. africanum leaves~~) or  
406 pounded in a mortar (e.g., *Hillieria latifolia*) and added to the stew. Condiments were grated  
407 (~~bark from Afrostyrax lepidophyllus bark~~), dried (~~seeds of Aframomum~~ spp. seeds), or roasted and  
408 crushed (seeds of *Ricinodendron heudelotii* and *Monodora myristica*) before being added to the  
409 dish.



410 Some wild food plants were eaten only on specific occasions, mostly for ritual purposes. To  
411 prepare men before hunting expeditions and increase their success, women prepared the leaves of  
412 *Anchomanesdifformis*, which were thought to make the hunter fearless for elephants, or the  
413 rhizome of *Renealmia* sp. (WTH64), which was thought to bring good luck to the hunter. The  
414 leaves of *Costusenglerianus* or *Adeniamannii* were prepared to strengthening boys after their  
415 circumcision.

416

### 417 **Commercialization of wild edible plants**

418 During the recall exercise on general income received from sale over the 14 previous days, the  
419 Baka reported six different taxa as being sold. The most frequently commercialized NTFP was  
420 *Gnetumcf. africanum* (26% of the 114 interviews), far more than ~~the any of the other WEP wild~~  
421 ~~food plants~~, which were mentioned as sold in less than 5% of the interviews (seeds and oil of  
422 *Irvingia gabonensis*, *BaillonellaB.toxisperma*, *Pentaclethra macrophylla*, bark of  
423 *Afrostryaxlepidophyllus* and the fruits of *Aframomum* spp., indicated under the general name of  
424 ‘tondo’). During the walk-in-the-woods surveys, however, the Baka pointed out 24 different  
425 WEP species that they sold to middlemen (including the six previously mentioned) ~~that they sold~~  
426 ~~to middlemen~~, mostly in the form of fruits, seeds, or the oil from seeds. Of the 24 commercial  
427 species that appeared during the forest surveys, 13 were commonly sold on the international  
428 NTFP market (Table 3). When we collected specimens during the walk-in-the-woods surveys,  
429 we discovered that the Baka name ‘tondo’ referred to four different species of *Aframomum*: *A.*  
430 *sceptrum*, *A. daniellii*, *A. subsericum* and *A. cf. longipetiolatum*. Only *A. cereum* was not sold as  
431 spice to middlemen, but just consumed within the household. Of the 24 commercial species

432 traded by the Baka, four appeared in the IUCN Red List as vulnerable and two as near threatened

433 (Table 3).

434

435 **Table 3. Wild food plant products sold by the Baka and their conservation status. Data**

436 **were** retrieved through different methods.

| Species                                                                 | Plant parts            | Walk-in-the-woods | Income recalls | (Inter-)national or domestic-trade | IUCN status     | Formatted: Justified                   |
|-------------------------------------------------------------------------|------------------------|-------------------|----------------|------------------------------------|-----------------|----------------------------------------|
| <i>Afrostyraxlepidophyllus</i> <del>Mildbr.</del>                       | bark                   | y                 | y              | [8]                                | Vulnerable      | Formatted: Justified                   |
| <i>Irvingia gabonensis</i> <del>(Aubry-Lecomte ex O'Rorke) Baill.</del> | fruits, seeds          | y                 | y              | [8]                                | Near threatened | Formatted: Justified                   |
| <i>Panda oleosa</i> <del>Pierre</del>                                   | oil from seeds         | y                 |                | [7]                                | Least concern   | Formatted: Justified                   |
| <i>Gnetum</i> cf. <i>africanum</i> <del>Welw.</del>                     | leaves                 | y                 | y              | [8]                                | Near threatened | Formatted: Justified                   |
| <i>Dioscorea</i> cf. <i>praehensilis</i> <del>Benth.</del>              | tuber                  | y                 |                | No data                            | Least concern   | Formatted: Justified                   |
| <i>Baillonellatoxisperma</i> <del>Pierre</del>                          | fruits, oil from seeds | y                 | y              | Oil [7]                            | Vulnerable      | Formatted: Justified, Indent: Left: 0" |
| <i>Pentaclethra macrophylla</i> <del>Benth.</del>                       | oil from seeds         | y                 | y              | [7]                                | Least concern   | Formatted: Justified, Indent: Left: 0" |
| <i>Garcinia kola</i> <del>Heckel</del>                                  | bark                   | y                 |                | [8]                                | Vulnerable      | Formatted: Justified, Indent: Left: 0" |
| <i>Piper guineense</i> <del>Schumacher &amp; Thonn.</del>               | fruits                 | y                 |                | [71]                               | Least concern   | Formatted: Justified, Indent: Left: 0" |

|                                                                         |                          |   |    |         |               |                                                                                                           |
|-------------------------------------------------------------------------|--------------------------|---|----|---------|---------------|-----------------------------------------------------------------------------------------------------------|
| <i>Parinari excelsa</i> <del>Sabine</del>                               | firewood                 | y |    | No data | Least concern | Formatted: Justified, Indent: Left: 0"                                                                    |
| <i>Xylopia parviflora</i> <del>Spruce</del>                             | fruits                   | y |    | [8]     | Not evaluated | Formatted: Font: Times New Roman, 11 pt<br>Formatted: Indent: Left: 0"                                    |
| <i>Irvingia robur</i> <del>Mildbr.</del>                                | seeds                    | y |    | No data | Least concern | Formatted: Font: Times New Roman, 11 pt<br>Formatted: Justified                                           |
| <i>Ricinodendron heudelotii</i> <del>(Baill.) Hecke</del>               | seeds                    | y |    | [8]     | Vulnerable    | Formatted: Font: Times New Roman, 11 pt<br>Formatted: Justified                                           |
| <i>Cola acuminata</i> <del>Schott. &amp; Endl.</del>                    | seeds                    | y |    | [8]     | Least concern | Formatted: Font: Times New Roman, 11 pt<br>Formatted: Justified                                           |
| <i>Tetrapleura tetraptera</i> <del>(Schum. &amp; Thonn.) Taub.</del>    | fruits                   | y |    | [8]     | Least concern | Formatted: Font: Times New Roman, 11 pt<br>Formatted: Justified<br>Formatted: Justified, Indent: Left: 0" |
| <i>Laccospermum secundiflorum</i> <del>(P. Beauv.) Kuntze</del>         | stem<br>(craft material) | y |    | No data | Least concern | Formatted: Font: Times New Roman, 11 pt<br>Formatted: Justified                                           |
| <i>Aframomum cf. longipetiolatum</i> <del>Koechlin</del>                | fruits                   | y | y* | [8]     | Not evaluated | Formatted: Justified                                                                                      |
| <i>Aframomum subsericum</i> <del>(Oliv. &amp; D. Hanb.) K. Schum.</del> | fruits                   | y | y* | No data | Not evaluated | Formatted: Justified                                                                                      |
| <i>Aframomum daniellii</i> <del>(Hook. f.) K. Schum.</del>              | fruits                   | y | y* | No data | Least concern | Formatted: Justified                                                                                      |
| <i>Aframomum sceptrum</i> <del>(Oliv. &amp; D. Hanb.) K. Schum.</del>   | fruits                   | y | y* | [8]     | Not evaluated | Formatted: Justified                                                                                      |
| <i>Trichoscypha</i> sp. WTH25                                           | fruits                   | y |    | [71]    | -             | Formatted: Justified                                                                                      |
| <i>Monodoramyristica</i> <del>(Graertn.) Dunal</del>                    | fruits                   | y |    | [71]    | Least concern | Formatted: Justified                                                                                      |

|                                            |        |   |  |         |               |
|--------------------------------------------|--------|---|--|---------|---------------|
|                                            |        |   |  |         | concern       |
| <i>Piper umbellatum</i> <del>L.</del>      | fruits | y |  | No data | Not evaluated |
| <i>Solanum erianthum</i> <del>D. Don</del> | fruits | y |  | No data | Not evaluated |

Formatted: Justified

Formatted: Justified

437 \* all mentioned under the Baka folk taxon 'tondo'.

438

439 During our forest walks, we identified six WEP of which the wood was observed as logged or  
 440 said to be logged by the Baka (Table 4). Three of these species were considered as vulnerable by  
 441 the IUCN, but none appeared on the CITES ~~Appendixes~~ Appendices I or II. The moabi tree  
 442 (*Baillonella* ~~B.~~ *toxisperma*), highly valued by the Baka for their fresh fruits and seed oil, was the  
 443 most sought after by the logging companies operating in ~~the~~ Baka territory. Our informants  
 444 mentioned that only trees exceeding one meter in diameter were felled, so several smaller  
 445 individuals were still present. ~~The~~ However, the extraction of large moabi trees by timber  
 446 companies strongly affected the amount of fruits and seeds that remained available for the  
 447 Baka's subsistence and cash income. Another species that we observed as felled trunks was  
 448 *Entandrophragmacylindricum*, which itself was inedible, but commonly hosted edible  
 449 caterpillars, an important food for the Baka. During the forest walks, we also observed several  
 450 (smaller) trees cut down by the Baka themselves, mostly to obtain fresh leaves of *Gnetum* cf.  
 451 *africanum* lianas, to harvest honey, and once to collect the bitter bark of *Garcinia kola*, which ~~is~~  
 452 was added to *Raphia* palm wine as a flavoring agent.

Formatted: Font: 12 pt

453

454 **Table 4. Commercial hardwood tree species producing edible fruits and/or seeds consumed**  
 455 **by the Baka, trade names and current conservation status.**

| Scientific name                  | Baka name | Commercial trade name | Nr. logs <u>Observed*</u><br><u>in 14 days</u> | IUCN status    |
|----------------------------------|-----------|-----------------------|------------------------------------------------|----------------|
| <i>Baillonellatoxisperma</i>     | Mabe      | Moabi                 | 9                                              | Vulnerable     |
| <i>Chrysophyllumlacourtianum</i> | Bambu     | Longhi,<br>Abam       |                                                | Not evaluated  |
| <i>Diospyros cf. crassiflora</i> | Lembe     | (Gabon)<br>Ebony      | 2                                              | Vulnerable     |
| <i>Trichoscyphacf. abut</i>      | Agbo      | -                     |                                                | Least concern  |
| <i>Desbordesia insignis</i>      | Ntuo      | Alep                  |                                                | Not evaluated  |
| <i>Sterculia oblonga</i>         | Egboyo    | Eyong                 |                                                | Vulnerable     |
| <i>Afzeli</i> sp.                | Tanda     | Doussier              | 3                                              | <u>No data</u> |

Formatted: Centered

Formatted: Indent: Left: 0"

456 \* Observed during 14 days by the authors. When no logs were observed, the species were

457 mentioned by the Baka as logged by timber companies

458

## 459 Discussion

460

### 461 High diversity in wild food plants

462 A major insight provided by this study is the high diversity of WEPs known and eaten by the

463 Baka (94 folk taxa, 91 species). Such results are comparable to earlier ethnographic studies

464 carried out among small forest dwelling societies in the Congo Basin (e.g., [2]). Eventhough the

465 Baka are when facing socio-ecological changes and potential dietary transition [45], our results

Formatted: Not Highlight

466 show that the ~~y~~Baka still know and consume a large diversity of wild edible plants. Apart from  
467 the fact that the Baka no longer processed and consumed the oil of *Pentaclethra macrophylla*,  
468 but rather sold the seeds to middlemen who processed them elsewhere, we found little evidence  
469 ~~of for~~ loss of knowledge or disappearing plant uses [52]. Most wild food plants occurred in  
470 (selectively logged) primary forests, and ~~were~~ consisted predominantly of fruits and seeds of  
471 ~~mature canopy~~ trees and lianas, underlying the importance of this ecosystem for Baka diet and  
472 culture. For their daily fat intake, the Baka depended heavily on the large fruits and seeds of the  
473 Irvingiaceae family, *Panda oleosa* and *Pogaoleosa*. These species are typical to the Congo Basin  
474 forests, in which complex food and dispersal interactions take place between big terrestrial  
475 mammals (such as elephants) and the local flora [62,72,75]. Many of the oily seed-producing  
476 trees in Central Africa are ecological keystone species that are crucial for the survival of local  
477 wildlife [72], on which forest-dwelling groups such as the Baka rely on for meat [13].  
478 The diversity of the wild plants eaten by the Baka covers a wide variety of plants parts,  
479 highlighting the role played by WEP in providing important nutrients that may not be found in  
480 planted crops and store-bought foods. This diversity is also targeted by ~~the~~ traders in timber and  
481 non-timber forest products, ~~as~~ at least 30 WEP species are either sold to middlemen and enter  
482 the (inter-) national NTFP market or are ~~targeted~~ extracted by loggers, underlying which  
483 sometimes causes the conflicts ~~of between wild plant uses present in~~ the Baka and commercial  
484 parties entering their territory. The various direct and indirect effects of logging and trade in  
485 NTFPs in this region ~~may impact~~ does not only affect human food resources, but has an impact  
486 on the entire ecosystem.

487

## 488 **Different methods yield different results**

489 Although our research was performed among a relatively small human population, our results  
490 show that different methods resulted in substantial differences in the collected data. The *ex-situ*  
491 interviews did not capture the full diversity of WEPs known, used and sold by the Baka, ~~even if~~  
492 ~~they efficiently captured the requested information~~. As shown in ~~Figure Fig 23~~, the species  
493 accumulation curve of the freelisting method flattened after interviewing 55 individuals.  
494 Typically, 14 of the 55 respondents did not report any WEP, which resulted in several flat  
495 sections in the curve. ~~The species accumulation curve for the dietary recall method flattened after~~  
496 ~~interviewing 83 people (Fig.2)~~.

497  
498 Fig 23. Species accumulation curves of WEPs mentioned during the 55 freelisting and 83  
499 dietary recall interviews in Le Bosquet and Kungu, southeast Cameroon, 2018.

500  
501 ~~The species accumulation curve for the dietary recall method flattened after interviewing 83~~  
502 ~~people (Fig 3)~~. Between respondents 46 and 83, only three new species were mentioned, which  
503 suggests that interviewing more respondents would not have led to ~~many-much~~ more wild edible  
504 ~~plant~~ species being mentioned. Therefore, both freelisting and dietary recalls appeared to have  
505 captured most of the WEP diversity that was possible by these methods. In contrast, the species  
506 accumulation curve for the walk-in-the-woods method flattened somewhat after 11 days, but not  
507 completely (Fig. ~~34~~). Our Baka informants indeed mentioned that there were additional rare  
508 species that could only be found after walking for hours in the forest. We know that at least four  
509 other ~~edible~~ species could have been found if we had more time to venture further into the forest.  
510 From their Baka names and the literature [2, 59], we assume that these ~~WEP~~ were the African  
511 mammee apple (*Mammea africana*) with large edible fruits, a species of *Azelia* of which the red

512 arils around the seeds ~~are-were~~ eaten, a species of wild Raphia palm ~~tree~~ of which the sap ~~is-was~~  
513 fermented into palm wine, and the African walnut tree (*Coula edulis*) that ~~produces~~  
514 ~~produced~~ highly valued nuts.

515  
~~Fig 2. Species accumulation curves of WEP mentioned during 55 freelisting and 83 dietary  
516 recall interviews in Le Bosquet and Kungu, southeast Cameroon, 2018.~~

517  
518  
519 **Fig 34. Species accumulation curve of WEP-wild edible plants mentioned during 14 days of**  
520 **walking in the forest with 20 informants around Le Bosquet and Kungu, southeast**  
521 **Cameroon, 2019.**

522  
523 Regarding the overall WEP diversity ~~gathered-recorded~~ through the different methods, we see  
524 that the WEP-botanical diversity reported would have been considerably less if we would only  
525 have conducted the *ex-situ* interviews ~~s-methods~~. The freelisting (38 WEP species) and dietary  
526 recalls (12 spp.) resulted in just a fraction of the 91 species found during the walk-in-the-woods  
527 survey. Such low number of species reported may be partly due to the fact that not every  
528 participant understood the concept of ‘wild edible plant’. Wild food plants play an important role  
529 in Baka livelihood [2, 3] and knowledge related to edible plants is acquired early during  
530 childhood [73]. Therefore, it seems unlikely that ~~the-those~~ Baka adult informants who did not  
531 report any WEP during the freelisting did not know any. They probably did not understand the  
532 domain, or the domain was too ubiquitous, a limitation that has been also found in other settings  
533 [74].



534 During the walk-in-the-woods method, the researcher can directly exclude items pointed out by  
535 informants that fall outside the domain ‘wild edible plant’, such as fungi, animal products and  
536 cultivated plants, although the latter category can be challenging due to the presence of wild  
537 species under various degrees and types of human management and ~~intervention through to~~  
538 domestication [48]. ~~Species mentioned as local names during ex-situ interviews listed~~ as ‘wild  
539 edible plant’ ~~during ex-situ interviews~~ may later, during botanical collection trips, appear to refer  
540 to domesticated crops, like the cultivated American crop species tania (*Xanthosoma*  
541 *sagittifolium*) and chili pepper (*Capsicum frutescens*), which were listed as wild edibles ~~by~~  
542 ~~during freelisting interviews in the DRC~~ [34]. ~~This was also the case in a recent study on WEP~~  
543 ~~consumed by Baka south of the Dja Reserve [76], in which the domesticated crops okra~~  
544 ~~(*Abelmoschus esculentus*), sorrel (*Hibiscus sabdariffa*) and chili pepper were listed as wild~~  
545 ~~edible plants, as well as an unidentified yam with the Baka name Mbooto (*Dioscorea* sp.10),~~  
546 ~~which was collected by us and identified as the domesticated *Dioscorea dumetorum*.~~  
547  
548 ~~Moreover, our~~ botanical inventory ~~also~~ revealed that ~~some general terms for a single~~ folk ~~taxa~~  
549 ~~taxon~~ mentioned during interviews ~~can~~ actually include several species. The local Baka name  
550 ‘tondo’ referred to three different species of *Aframomum*, the term ‘bokoko’ to two species of  
551 *Klainedoxa*, and ‘payo’ to three different species of *Irvingia* [75]. On the other hand, for the  
552 single ~~taxonomic species taxon~~ *Dioscorea minutiflora*, the Baka distinguished in three distinct  
553 types. The huge edible plant diversity collected in the forest survey was facilitated by our  
554 previously established list of folk taxa. If this preliminary work would not have been conducted,  
555 we would have needed more days of fieldwork and more informants to capture the full diversity  
556 of WEP consumed by the Baka.

Formatted: Font: Italic

Formatted: Font: Italic

Formatted: Font: Italic

Formatted: Font: Italic

557 While only six commercial ~~WEP species~~ wild food plants were ~~found recorded~~ through the income  
558 recall surveys, the walk-in-the-woods method revealed 24 traded species, of which several had  
559 never been reported previously as sold in Cameroon. Moreover, this *in-situ* method allowed us to  
560 observe traces of logged WEP species and unsustainable ways of harvesting NTFPs. ~~Moreover,~~  
561 ~~e~~Only ten of the 26 species mentioned as recently consumed during the walk-in-the-woods  
562 method were reported during the freelisting, while just three of them also emerged through the  
563 dietary recalls, although the number of people interviewed during the last two methods was  
564 substantially higher. In other words, 23 recently consumed species would not have been  
565 identified with dietary recalls only, and 16 would have been missed if only the freelisting and  
566 dietary recalls would have been performed. We speculate that these were plants that were easily  
567 forgotten (e.g., spices, condiments, small fruits), species that people feel ashamed of eating (~~e.g.,~~  
568 weeds), or items that were previously missed during the freelistings due to misinterpretation of  
569 the term ‘wild edible plant’ (e.g., drinking water from lianas, edible latex, ritual food plants)  
570 ~~during the free listings. Moreover, if~~ only using the *ex-situ* interview data, we would have  
571 missed four wild fruit trees that were ~~eaten by the Baka and also~~ extracted by timber companies  
572 ~~logged~~. Only two of these WEP-producing commercial hardwoods were mentioned in the  
573 freelisting interviews (*Baillonellatoxisperma* and *Chrysophyllum lacourtianum*), while only one  
574 was recorded through the dietary recalls (*B. toxisperma*).

575 The advantage of assessing plant knowledge within the ecological context is that many species  
576 are encountered that do not pop-up quickly in people’s minds during a (shorter) interview outside  
577 the forest. When walking through the natural environment where edible plants occur, it is easier  
578 to remember them because of the amounts of visual stimuli to this knowledge at that moment  
579 [7677]. The walk-in-the-woods method, however, is laborious to perform and requires additional

580 botanical collection, as more rare species will be encountered that are hard to identify, for which  
581 the help of taxonomic specialists and support from herbaria is needed. The number of informants  
582 that can be taken into the field is also limited and thus forest surveys are not suitable to draw  
583 conclusions on the general patterns of foraging, plant knowledge and uses.

584 On the other hand, *ex-situ* interview methods (including freelisting and dietary recalls) are  
585 known to assess the most salient useful plants among a large group of people in a relatively short  
586 time, as these techniques are limited by their spatio-temporal context [32, 37]. Freelisting yields  
587 much more information than just plant names and saliency, but also shows the items within a  
588 specific (local) domain and consensus in a community [74]. Conducted among a large number of  
589 people and in different seasons, dietary and income recall surveys ~~allow to get~~ provide a general  
590 overview of ~~the WEP plants~~ that contribute substantially to people's daily meals and subsistence  
591 strategies. Our results indicate, however, that ~~such these~~ short *ex-situ* interviews missed out a  
592 substantial part of the WEP diversity known, consumed and traded by the Baka. ~~Therefore, as~~  
593 ~~also reported by [74] regarding the use of freelisting, our~~ Our insights ~~provide evidence of~~ show  
594 the importance of not relying ~~only~~ on ~~either~~ *ex-situ* or *in-situ* methods, but rather combining both  
595 approaches ~~in order~~ to maximize the outputs ~~when aiming to~~ assessing ethnobotanical wild  
596 edible plants use and knowledge practices, which was earlier highlighted by Quinlan [74].

597 Since they can lead to an underestimation of wild edible plants known, consumed and  
598 commercially exploited, the implications of studies based solely on *ex-situ* interviews can be  
599 grave. Results of such studies may not be representative for the situation on the ground, as trade  
600 in NTFPs or conflicts between wild fruit collection and logging of fruit-producing trees may  
601 remain invisible. ~~The An~~ assessment of Baka knowledge on wild edible plants relying ~~only~~ on *ex-*  
602 *situ* methods only might have led to the conclusion that the Baka lost much of their knowledge,

603 or do not use the forest so intensively as their ancestors did. Moreover, the ~~assessment~~  
604 ~~calculations~~of the contribution of wild plants to local diet and nutrition ~~may be~~would have been  
605 inaccurate. Several studies based on dietary recalls have concluded that WEP do not play an  
606 important role in local diets. Some scholars ~~said they~~ were “confident to provide a fair  
607 representation of the dietary contribution of WEP on a population level in our sample” [51]:8],  
608 even though their botanical collection was limited to finding specimens to match the local names  
609 mentioned during their dietary recalls and freelisting interviews. In Brazil, scholars stated after  
610 their freelisting and dietary recall surveys that “~~The the~~ low consumption of wild species [...] is  
611 notable, which suggests that, in practice, these foods contribute little to contemporary dietary  
612 enrichment” [50:337]-337. Such data could be misused by policy makers, who may conclude  
613 that rural communities do not need the forest that much as previously thought.  
614 Considering the importance of wild plants for food security and for providing nutrients that are  
615 not present in other foods [7778], and the fact that children are major consumers of wild fruits  
616 but hardly recruited as interviewees [7879, 7980], it is crucial to draw the most accurate  
617 overview of the diversity of wild food items used by local people, especially in species-rich  
618 ecosystems in which plants, animals and human livelihoods are under increasing pressure.

619

## 620 **Conclusions**

621 Our results show that choosing an appropriate method (or combination of methods) is essential  
622 for assessing wild food plant knowledge and consumption. Ethnobotanical inventories that leave  
623 room for informants to point out edible plants that do not appear on predefined lists are essential  
624 to capture the full diversity of edible forest species. Our *in-situ* inventories yielded a wide variety  
625 of WEP that were not covered by our *ex-situ* interview methods, revealed details on local

626 patterns of foraging and challenged the general ideas of knowledge loss and underutilization of  
627 wild food plants in the region.  
628 Our mixed methods approach shows the importance of cross-referencing data, not only between  
629 different types of interviews, but also between interviews and direct observation during forest  
630 trips, for a better assessment of the diversity, consumption frequency, trade and conflicting uses  
631 of WEP. We therefore recommend that wild plant knowledge and use should be assessed through  
632 the use of a mixed methods approach. Using ‘open’ walk-in-the-woods surveys, in which  
633 informants are encouraged to mention any useful plant they know or randomly encounter, after  
634 which they are asked when they last used it, provides a wider variety of data. Employing the  
635 walk-in-the-woods technique merely to supply specimens for previously composed lists of useful  
636 plants from literature or interviews limits the capacity of this powerful technique to assess wild  
637 plant knowledge and use. Freelisting and dietary recalls can be used to provide quantitative data  
638 and a more general overview, but researchers should not limit themselves to such methods if they  
639 want to capture the full diversity of plants known and used, especially in the case when biased  
640 conclusions may have large implications for people’s future livelihood, culture and wellbeing.

641

## 642 **Acknowledgements**

643 We ~~firstly would like to~~thank our ~~colleagues, especially our field~~ assistants  
644 Appolinaire Ambassa ~~and~~ Ernest Isidore Simpoh and driver Alain Hyppolite Fezeu for their help  
645 with the fieldwork. We ~~deeply thank~~ are grateful to Professor Bonaventure Sonké for his support  
646 in Cameroon; ~~David Harris (Edinburgh herbarium), Jan Wieringa, Paul Maas and Carel Jongkind~~  
647 (Naturalis) and Marc Sosef (Meise Botanical Gardens); helped us to identify our specimens.

648 Finally, our greatest gratitude goes to all Baka children, women and men with whom we have  
649 lived and worked. Thank you for your trust, hospitality and generous hearts.

650

Formatted: Font: 12 pt

## 651 References

652 1. ~~1.~~ Riddell M. Assessing the impacts of conservation and commercial forestry on livelihoods  
653 in northern Republic of Congo. ~~Conservation Conservand Society~~. 2013;11:199. doi:  
654 10.4103/0972-4923.121002.

Formatted: Font: (Default) Times New Roman, 12 pt

Formatted: List Paragraph, Indent: Left: 0", Hanging: 0.3",  
Numbered + Level: 1 + Numbering Style: 1, 2, 3, ... + Start  
at: 1 + Alignment: Left + Aligned at: 0.25" + Indent at:  
0.5", Tab stops: 0.1", Left

655 2. ~~2.~~ Bahuchet S. Dans la forêt d'Afrique Centrale: les Pygmées Baka et Aka. Paris:  
656 PeetersSela; 1992.

Formatted: Font: (Default) Times New Roman, 12 pt,  
English (United States)

Formatted: Font: (Default) Times New Roman, 12 pt

657 3. ~~3.~~ Dounias E. Perception and use of wild yams by the Baka hunter-gatherers in south  
658 Cameroon. In: Hladik CM, Hladik A, Linares OF, Pagezy H, Semple A, ~~and~~ Hadley M,  
659 editors. Tropical ~~Forests~~forests, ~~People~~people and ~~Food~~food: Biocultural interactions and  
660 applications to development. Paris: (UNESCO-Parthenon); 1993. pp. 621–632.

Formatted: Font: (Default) Times New Roman, 12 pt

Formatted: Font: (Default) Times New Roman, 12 pt

Formatted: Font: (Default) Times New Roman, 12 pt

661 4. ~~4.~~ Van Dijk JFW. Non-timber forest products in the Bipindi-Akom region, Cameroon: ~~a~~  
662 ~~a~~socio-economic and ecological assessment. Wageningen: Tropenbos-Cameroon Series 1;  
663 1999.

Formatted: Font: (Default) Times New Roman, 12 pt

664 5. ~~5.~~ Terashima H, Ichikawa M. A comparative ethnobotany of the Mbuti and Efe Hunter-  
665 Gatherers in the Ituri Forest, Democratic Republic of Congo. ~~African-Afr~~Study Monographs.  
666 2003;24:1–168.

667 6. ~~6.~~ Yasuoka H. Fledging agriculturalists? Rethinking the adoption of cultivation by the Baka  
668 hunter-gatherers. ~~Afr Study Monogr~~African Study Monographs-Supplementary Issues-  
669 2012;43: 85–114.

Formatted: Font: (Default) Times New Roman, 12 pt

670 ~~7.~~ ~~7.~~ Hoare AL. The use of non-timber forest products in the Congo basin: Constraints and  
671 opportunities. New York: The Rainforest Foundation; 2007.

672 ~~8.~~ ~~8.~~ Ingram V, Schure J. Review of Non Timber Forest Products (NTFPs) in Central Africa.  
673 Yaoundé: CIFOR; 2010.:

674 ~~9.~~ ~~9.~~ Ndoye O, Tieguhong JC. Forest resources and rural livelihoods: the conflict between  
675 timber and non-timber forest products in the Congo Basin. ~~Scand J For Res~~ ~~Scandinavian~~  
676 ~~Journal of Forest Research~~. 2004;19(S4): 36-44 doi: 10.1080/14004080410034047.

677 ~~10.~~ ~~10.~~ Baudron F, Tomscha SA, Powell B, Groot JCJ, Gergel SE, Sunderland T. Testing the  
678 various pathways linking forest cover to dietary diversity in tropical landscapes. ~~Frontiers~~  
679 ~~in Sustainable Sustain~~ ~~Food Systems~~. 2019;3: 97. doi: 10.3389/fsufs.2019.00097.

680 ~~11.~~ ~~11.~~ Shapiro A, Grantham HS, Aguilar-Amuchastegui N, Murray NJ, Gond V, Bonfils D, and  
681 Rickenbach O. Forest condition in the Congo Basin for the assessment of ecosystem  
682 conservation status. BioRxiv [Preprint]. ~~2020 bioRxiv~~ ~~2020.03.25.008110~~. [~~posted 2020~~  
683 ~~March 26~~]. Available from  
684 ~~https://www.biorxiv.org/content/10.1101/2020.03.25.008110v1~~ ~~https://www.biorxiv.org/cont~~  
685 ~~ent/10.1101/2020.03.25.008110v1.abstract~~. doi: 10.1101/2020.03.25.008110.

686 ~~12.~~ ~~12.~~ De Wasseige C, De Marcken P, Bayol N, HiolHiol F, Mayaux P, Desclée B, et al. Les  
687 ~~Forêts forêts~~ du Bassin du Congo: État des Forêts 2010. Luxembourg: Office des  
688 publications de l'Union Européenne; 2012.

689 ~~13.~~ ~~13.~~ Fa JE, Currie D, Meeuwig J. Bushmeat and food security in the Congo Basin: ~~linkages~~  
690 ~~Linkages~~ between wildlife and people's future. ~~Environmental Environ~~ ~~Conservation~~.  
691 2003;30: 71-78.

Formatted: Font: (Default) Times New Roman, 12 pt

- 692 ~~14.~~ ~~14.~~Rist L, Shanley P, Sunderland T, Sheil D, Ndoye O, Liswanti N, et al. The impacts of  
693 selective logging on non-timber forest products of livelihood importance. ~~Forest For Ecology~~  
694 ~~Ecoland-Management~~. 2012;268: 57–69. doi: 10.1016/j.foreco.2011.04.037.
- 695 ~~15.~~ ~~15.~~Chazdon RL, Harvey CA, Komar O, Griffith DM, Ferguson BG, Martínez-Ramos M, et  
696 al. ~~Beyond reserves: A research agenda for conserving biodiversity in human-modified~~  
697 tropical landscapes. *Biotropica*. 2009;41: 142–153. doi: 10.1111/j.1744-7429.2008.00471.x.
- 698 ~~16.~~ ~~16.~~Pardo-de-Santayana M, Macia MJ. The benefits of traditional knowledge. *Nature*.  
699 2015;518: 487–488. doi: 10.4337/9781783474257.iii.19.
- 700 ~~17.~~ ~~17.~~Pandey AK, Tripathi Y. Ethnobotany and its relevance in contemporary research.  
701 ~~Journal of J Medicinal Plants Studies~~. 2017;5: 123–129.
- 702 ~~18.~~ ~~18.~~Ickowitz A, Powell B, Salim MA, Sunderland TC. Dietary quality and tree cover in  
703 Africa. *Global Environmental Change*. 2014;24: 287-294. doi:  
704 10.1016/j.gloenvcha.2013.12.001.
- 705 ~~19.~~ ~~19.~~Hladik CM, Hladik A, Linares OF, Pagezy H, Semple A, Hadley H. *Tropical*  
706 ~~Forestsforests, People-people and Foodfood: Biocultural interactions and applications to~~  
707 development. Paris: UNESCO-Parthenon; 1993.
- 708 ~~20.~~ ~~20.~~Ngome PIT, Shackleton C, Degrande A, Tieguhong JC. Addressing constraints in  
709 promoting wild edible plants’ utilization in household nutrition: case of the Congo Basin  
710 forest area. *Agriculture and Food Security*. 2017;6(1): 20. doi: 10.1186/s40066-017-0097-5.
- 711 ~~21.~~ ~~21.~~Robillard M, Bahuchet S. Les Pygmées et les autres: terminologie, catégorisation et  
712 politique. ~~Journaldes Africanistes~~. 2012;82(~~82~~-1/2): 15-51.

Formatted: Font: (Default) Times New Roman, 12 pt, Spanish (Spain)

Formatted: Font: (Default) Times New Roman, 12 pt



- 713 ~~22.~~ Gallois S, Duda R, Hewlett B, Reyes-García V. Children's daily activities and  
714 knowledge acquisition: a case study among the Baka from southeastern Cameroon. ~~Journal~~  
715 ~~of Ethnobiology and Ethnomedicine~~. 2015;11: 86. doi: 10.1186/s13002-015-0072-9.
- 716 ~~23.~~ Leclerc C. L'adoption de l'agriculture chez les Pygmées Baka du Cameroun: Dynamique  
717 sociale et continuité structurale. Versailles: Editions Quae; 2012.
- 718 ~~24.~~ EsamAwu H. Conservation-induced resettlement: The case of the Baka of southeast  
719 Cameroon - a variation on the habitual mobility-immobility nexus. *Transfers*. 2016;6(2):  
720 54-73. doi: 10.3167/TRANS.2016.060205.
- 721 ~~25.~~ Ramirez Rozzi FV. Reproduction in the Baka pygmies and drop in their fertility with the  
722 arrival of alcohol. *PNAS*. 2018;115(27): E6126-E6134.
- 723 ~~26.~~ Thomas E, Vandebroek I, Van Damme P. What works in the field? A comparison of  
724 different interviewing methods in ethnobotany with special reference to the use of  
725 photographs. ~~Economic-Econ~~ *Botany*. 2007;61: 376-384 doi: 10.1663/0013-0001.
- 726 ~~27.~~ Martin GJ. *Ethnobotany: A methods manual*. London: Earthscan; 2010.
- 727 ~~28.~~ Quiroz D, Sosef ~~MSM~~, Van Andel TR. Why ritual plant use has ethnopharmacological  
728 relevance. ~~Journal of~~ *Ethnopharmacology*. 2016;188: 48-56. doi: 10.1016/j.jep.2016.05.006.
- 729 ~~29.~~ Quinlan M. Considerations for collecting freelists in the field: Examples from  
730 *Ethnobotany*. *Field methods*. 2005;17: 219-234 doi: 10.1177/1525822X05277460.
- 731 ~~30.~~ Mengistu F, Hager H. Wild edible fruit species cultural domain, informant species  
732 competence and preference in three districts of Amhara region, Ethiopia. ~~Ethnobotany~~  
733 ~~Research and Applications~~. 2009; 6: 487-502.
- 734 ~~31.~~ Ghorbani A, Langenberger G, Sauerborn J. A comparison of the wild food plant use  
735 knowledge of ethnic minorities in Naban River Watershed National Nature Reserve,

Formatted: Font: (Default) Times New Roman, 12 pt, English (United States)

Formatted: Font: (Default) Times New Roman, 12 pt

Formatted: Font: (Default) Times New Roman, 12 pt, English (United States)

Formatted: Font: (Default) Times New Roman, 12 pt

Formatted: Font: (Default) Times New Roman, 12 pt

Formatted: Font: (Default) Times New Roman, 12 pt

736 Yunnan, SW China. ~~Journal of Ethnobiology and Ethnomedicine~~. 2012;8: 17. doi:  
737 10.1186/1746-4269-8-17.

738 ~~32.~~ ~~32.~~ Pires de Sousa DC, Taboada Soldati G, Monteiro JM, de Sousa Araújo TA, Albuquerque  
739 UP. Information retrieval during free listing is biased by memory: Evidence from medicinal  
740 plants. ~~PLoS ONE~~. 2016;11: 1–15. doi: 10.1371/journal.pone.0165838.

741 ~~33.~~ ~~33.~~ Fongnzossie EF, Nyangono CFB., Biwole AB, Ebai PNB, Ndifongwa NB, Motove J, et  
742 al. Wild edible plants and mushrooms of the Bamenda Highlands in Cameroon:  
743 ~~ethnobotanical~~ ~~Ethnobotanical~~ assessment and potentials for enhancing food security.  
744 ~~Journal of Ethnobiology and Ethnomedicine~~. 2020;16: 1–10. doi: 10.1186/s13002-020-  
745 00362-8.

746 ~~34.~~ ~~34.~~ Termote C, Van Damme P, Djailo BD. Eating from the wild: Turumbu, Mbole and Bali  
747 traditional knowledge on non-cultivated edible plants, District Tshopo, DR Congo.  
748 ~~Genetic Resources and Crop Evolution~~. 2011;58: 585–618 doi: 10.1007/s10722-010-9602-4.

749 ~~35.~~ ~~35.~~ Lulekal E, Asfaw Z, Kelbessa E, Van Damme P. Ethnomedicinal study of plants used for  
750 human ailments in Ankober District, North Shewa Zone, Amhara region, Ethiopia. ~~Journal~~  
751 ~~of Ethnobiology and Ethnomedicine~~. 2013;9: 63. doi: 10.1186/1746-4269-9-63.

752 ~~36.~~ ~~36.~~ Phillips O, Gentry AH. The useful plants of Tambopata, Peru: 1. Statistical hypotheses  
753 tests with a new quantitative technique. ~~Economic Botany~~. 1993;47: 15–32. doi:  
754 10.1007/BF02862203.

755 ~~37.~~ ~~37.~~ Paniagua Zambrana NY, Bussmann RW, Hart RRE, Moya Huanca AL., Ortiz Soria G,  
756 Ortiz Vaca MMO., et al. To list or not to list? The value and detriment of freelisting in  
757 ethnobotanical studies. ~~Nature Plants~~. 2018; 4(4): 201–204. doi: 10.1038/s41477-018-0128-  
758 7.

Formatted: Font: (Default) Times New Roman, 12 pt

Formatted: Font: (Default) Times New Roman, 12 pt

Formatted: Font: (Default) Times New Roman, 12 pt, Spanish (Spain)

Formatted: Font: (Default) Times New Roman, 12 pt

Formatted: Font: (Default) Times New Roman, 12 pt, English (United States)

Formatted: Font: (Default) Times New Roman, 12 pt

- 759 ~~1.~~ ~~38.~~ Cruz Da Cunha LVF, De Albuquerque UP. Quantitative ethnobotany in an Atlantic  
760 forest fragment of Northeastern Brazil: Implications to conservation.  
761 *Environmental Monitoring and Assessment*. 2006;114: 1–25. doi: 10.1007/s10661-006-1074-  
762 9.
- 763 ~~38.~~
- 764 ~~39.~~ ~~39.~~ Kuhnlein HV. Introduction: Why are Indigenous Peoples' food systems important and  
765 why do they need documentation? In: Kuhnlein HV, Erasmus B, Spigelski D, editors.  
766 Indigenous Peoples' food systems: the many dimensions of culture, diversity and  
767 environment for nutrition and health. ed. (Rome: FAO); 2009. pp. 1–8.
- 768 ~~40.~~ ~~40.~~ Reyes-García V, Vadez V, Huanca T, Leonard W, Wilkie D. Knowledge and  
769 consumption of wild plants: A comparative study in two Tsimane' villages in the Bolivian  
770 Amazon. *Ethnobotany Research and Applications*. 2005;3: 201 doi: 10.17348/era.3.0.201-  
771 208.
- 772 ~~41.~~ ~~41.~~ De Albuquerque UP. Re-examining hypotheses concerning the use and knowledge of  
773 medicinal plants: A study in the Caatinga vegetation of NE Brazil. *Journal of*  
774 *Ethnobiology and Ethnomedicine*. 2006;2: 30. doi: 10.1186/1746-4269-2-30.
- 775 ~~42.~~ ~~42.~~ Gross DR. Time allocation: a tool for the study of cultural behavior. *Annual Review of*  
776 *Anthropology*. 1984;13(1): 519–558.
- 777 ~~43.~~ ~~43.~~ Munger RG, Folsom AR, Kushi LH, Kaye SA, Sellers TA. Dietary assessment of older  
778 Iowa women with a food frequency questionnaire: nutrient intake, reproducibility, and  
779 comparison with 24-hour dietary recall interviews. *American Journal of Epidemiology*.  
780 199;2(136): 192-200. doi: 10.1093/oxfordjournals.aje.a116485

Formatted: Font: (Default) Times New Roman, 12 pt, Spanish (Spain)

Formatted: Font: (Default) Times New Roman, 12 pt

Formatted: Font: (Default) Times New Roman, 12 pt

Formatted: List Paragraph, Indent: Left: 0", Hanging: 0.3", Numbered + Level: 1 + Numbering Style: 1, 2, 3, ... + Start at: 1 + Alignment: Left + Aligned at: 0.25" + Indent at: 0.5", Tab stops: 0.1", Left

Formatted: Font: (Default) Times New Roman, 12 pt

Formatted: Font: (Default) Times New Roman, 12 pt

Formatted: Font: (Default) Times New Roman, 12 pt, French (France)

Formatted: Font: (Default) Times New Roman, 12 pt

- 781 ~~44.~~ ~~44.~~ Friant S, Ayambem WA, Alobi AO, Ifebueme NM, Otukpa OM, Ogar DA, Alawa CBI,  
782 et al. Life on the rainforest edge: food security in the agricultural-forest frontier of Cross  
783 River state, Nigeria. ~~Frontiers in Sustainable Food Systems~~. 2019;3: 1–14. doi:  
784 10.3389/fsufs.2019.00113.
- 785 ~~45.~~ ~~45.~~ Reyes-García V, Powell B, Díaz-Reviriego I, Fernández-Llamazares Á, Gallois S, Gueze  
786 M. Dietary transitions among three contemporary hunter-gatherers across the tropics. Food  
787 Security. 2019;11: 1–14. doi: 10.1007/s12571-018-0882-4.
- 788 ~~46.~~ ~~46.~~ Levang P, Lescuyer G, Noubissi D, Déhu C, Brousolle L, Trees F, Lescuyer G. Does  
789 gathering really pay? Case studies from forest areas of the East and South regions of  
790 Cameroon. For Trees Livelihoods. 2015;24(2): 128-143. doi:  
791 10.1080/14728028.2014.1000980.
- 792 ~~47.~~ ~~47.~~ Delang CO. Not just minor forest products: the economic rationale for the consumption  
793 of wild food plants by subsistence farmers. ~~Ecological Economies~~. 2006;59: 64-73. doi:  
794 10.1016/j.ecolecon.2005.10.006.
- 795 ~~48.~~ ~~48.~~ Bharucha Z, Pretty J. The roles and values of wild foods in agricultural systems.  
796 ~~Philosophical Transactions of the Royal Society B: Biological Sciences~~. 2010;365: 2913–  
797 2926. doi: 10.1098/rstb.2010.0123.
- 798 ~~49.~~ ~~49.~~ Ogle BM. Wild vegetables and micronutrient nutrition: Studies on the significance of  
799 wild vegetables in women’s diets in Vietnam. ~~Ph. D. thesis, University of Uppsala: Acta~~  
800 ~~Universitatis Upsaliensis~~; 2001
- 801 ~~50.~~ ~~50.~~ Do Nascimento VT, de Lucena RFP, Maciel MIS, de Albuquerque UP. Knowledge and  
802 use of wild food plants in areas of dry seasonal forests in Brazil. ~~Ecology of Food and~~  
803 ~~Nutrition~~. 2013;52: 317–343. doi: 10.1080/03670244.2012.707434.

Formatted: Font: (Default) Times New Roman, 12 pt, Dutch (Netherlands)

Formatted: Font: (Default) Times New Roman, 12 pt

804 ~~51. 51.~~Termote C, BwamaMeyi M, Dhed’adJailo B, Huybregts L, Lachat C, Kolsteren P, Van  
805 Damme P. A biodiverse rich environment does not contribute to a better diet: a case study  
806 from DR Congo. PLoS ONE. 2012;7(1): e30533. doi: 10.1371/journal.pone.0030533.

807 ~~52. 52.~~Gallois S, Heger WT, van Andel TR, Sonké B, Henry AG. From bush mangoes to  
808 bouillon cubes: Wild plants and diet among the Baka, forager-horticulturalists from  
809 southeast Cameroon. ~~Economic Botany~~. 2020;~~74: 1-1346-58~~. doi: 10.1007/s12231-020-  
810 09489-x.

811 ~~53. 53.~~Betti JL, Kourogue RL, Mbong FA, Fils PEB, Njukouyou OFN. Diversity in the usages  
812 of edible wild plants by the Baka and Bakwélé in the periphery of the Tala Tala Forest  
813 Management Unit, North Congo. ~~Ethnobotany Research and Applications~~. 2020;-19: 1-20.

814 ~~54. 54.~~Grandjean AC. Dietary intake data collection: Challenges and limitations.  
815 ~~Nutrition Reviews~~. 2012;70: 101–104. doi: 10.1111/j.1753-4887.2012.00545.x.

816 ~~55. 55.~~Letouzey R. Notice de la carte phytogéographique du Cameroun au 1:500000: 4.  
817 Domaine de la forêt dense humide toujours verte. Toulouse: Institut de la Carte  
818 Internationale de la Végétation; 1985.

819 ~~56. 56.~~ISE. International Society of Ethnobiology Code of Ethics (with 2008 additions). [2006].  
820 Available from <http://ethnobiology.net/code-of-ethics/>.

821 ~~57. 57.~~Kennedy G, Ballard T, Dop M. Guidelines for measuring household and individual  
822 dietary diversity. Rome: ~~Food and Agriculture Organization of the United Nations~~  
823 ~~(FAO)~~;2011.

824 ~~58. 58.~~Godoy R, Reyes-García V, Huanca T, Tanner S, Seyfried C. On the measure of income  
825 and the economic unimportance of social capital: Evidence from a native Amazonian society  
826 of farmers and foragers. ~~Journal of Anthropological Research~~. 2007;63(2): 239-260.

Formatted: Font: (Default) Times New Roman, 12 pt

Formatted: Font: (Default) Times New Roman, 12 pt

827 ~~59.~~ ~~59.~~Brisson, R. Petit Dictionnaire Baka-Français, Sud Cameroun. Paris:l'Harmattan; 2010.

828 ~~60.~~ ~~60.~~Royal Botanical Gardens Kew. Flora of West Tropical Africa: all territories in West  
829 Africa South of Latitude 18° N. and to the West of Lake Chad. Kew: Royal Botanical  
830 Gardens; 1931-1973.

831 ~~61.~~ ~~61.~~Association de Botanique Tropicale. Flore du Cameroun. Yaoundé: Herbar National du  
832 Cameroun; 1963-2018.

833 ~~62.~~ ~~62.~~Harris DJ. A revision of the Irvingiaceae in Africa. ~~Bulletin du Jardin botanique Bot~~  
834 ~~national Natl de Belgique/Bulletin van de Nationale Plantentuin van België Belg.~~  
835 ~~1996;65(1/2): 143-196.~~

Formatted: English (United States)

Formatted: Dutch (Netherlands)

836 ~~63.~~ ~~63.~~Hawthorne WD, Jongkind CCH. Woody plants of western African forests:-A guide to  
837 the forest trees, shrubs and lianas from Senegal to Ghana. Kew: Royal Botanic Gardens;  
838 2006.

839 ~~64.~~ ~~64.~~Harris DJ, Wortley AH. Monograph of ~~Aframomum~~ (Zingiberaceae). ~~Systematic~~  
840 ~~Botany Monographs~~. 2018;140: 1-204.

Formatted: Font: Italic

841 ~~65.~~ ~~65.~~Plants of the World Online. ~~Facilitated by the~~ Royal Botanic Gardens, Kew. [2020].  
842 Available from <http://www.plantsoftheworldonline.org>.

Formatted: Font: (Default) Times New Roman, 12 pt

843 ~~66.~~ ~~66.~~Pennec F, Wencélius J. FLAME 1.1 Free-List Analysis under Microsoft Excel. User's  
844 Guide. Paris: CNRS; 2012.

845 ~~67.~~ ~~67.~~Peroni N, Farias H, Araujo P, Hanazaki N. Ecological ~~Methods methods~~ in  
846 ~~Ethnobotanical ethnobotanical and Ethnobiological ethnobiological Research research~~: Using  
847 diversity measurements and richness estimators. In: Albuquerque UP, Cruz da Cunha LVF,  
848 Paiva de Lucena RF, Alves RRN, editors. Methods and techniques in ethnobiology and  
849 ethnoecology. ~~Humana Press New York~~; Springer; 2014. pp. 398-412.

Formatted: Font: (Default) Times New Roman, 12 pt

850 ~~68.~~ ~~68.~~-CITES. Convention on International Trade in Endangered Species of Wild Fauna and

851 Flora. Appendices I, II, III. [2019]. Available from

852 <https://www.cites.org/eng/app/appendices.php>

Formatted: Font: (Default) Times New Roman, 12 pt

853 ~~69.~~ ~~69.~~-IUCN. ~~The~~ IUCN Red List of Threatened Species. Version 2020-1. [2020]. Available

854 from <https://www.iucnredlist.org>

Formatted: Font: (Default) Times New Roman, 12 pt

855 ~~70.~~ ~~70.~~-Magwé-Tindo J, Wieringa JJ, Sonké B, Zapfack, L, Vigouroux Y, Couvreur TLP,

856 Scarcelli N. Guinea yam (*Dioscorea* spp., Dioscoreaceae) wild relatives identified using

Formatted: Font: (Default) Times New Roman, 12 pt, Italic

857 whole plastome phylogenetic analyses. *Taxon*. 2018;67(5): 905-915. doi: 10.12705/675.4.

Formatted: Font: (Default) Times New Roman, 12 pt

858 ~~71.~~ ~~71.~~-EyogMatig O, Ndoye O, Awono A, Kengue J. Les fruitiers forestiers comestibles du

Formatted: Font: 12 pt

859 Cameroun. Cotonou: IPGRI; 2006.

Formatted: Font: Times, 12 pt

860 ~~2.~~ ~~72.~~-Beaune D, Fruth B, Bollache L, Hohmann G, Bretagnolle F. Doom of the elephant-

Formatted: Font: (Default) Times New Roman, 12 pt

861 dependent trees in a Congo tropical forest. *Forest Ecology and Management*. 2013;295: 109-

862 117. doi: 10.1016/j.foreco.2012.12.041.

863 ~~72.~~

Formatted: Font: (Default) Times New Roman, 12 pt

864 ~~3.~~ ~~73.~~-Gallois S, Duda R, Reyes-García V. Local ecological knowledge among Baka children:

Formatted: List Paragraph, Indent: Left: 0", Hanging: 0.3", Numbered + Level: 1 + Numbering Style: 1, 2, 3, ... + Start at: 1 + Alignment: Left + Aligned at: 0.25" + Indent at: 0.5", Tab stops: 0.1", Left

865 a case of "children's culture"? *Journal of Ethnobiology*. 2017;37(1): 60-80. doi:

866 10.2993/0278-0771-37.1.60.

867 ~~73.~~

Formatted: Font: (Default) Times New Roman, 12 pt

868 ~~4.~~ ~~74.~~-Quinlan M. The free-listing method. In: Liamputtong P, editor. Handbook of research

Formatted: List Paragraph, Indent: Left: 0", Hanging: 0.3", Numbered + Level: 1 + Numbering Style: 1, 2, 3, ... + Start at: 1 + Alignment: Left + Aligned at: 0.25" + Indent at: 0.5", Tab stops: 0.1", Left

869 methods in health social sciences. Singapore: Springer International; 2017. pp. 1-16.

870 ~~74.~~

Formatted: Font: (Default) Times New Roman, 12 pt

Formatted: List Paragraph, Indent: Left: 0", Hanging: 0.3", Numbered + Level: 1 + Numbering Style: 1, 2, 3, ... + Start at: 1 + Alignment: Left + Aligned at: 0.25" + Indent at: 0.5", Tab stops: 0.1", Left

871 ~~5.~~ ~~75.~~ Gallois, S, Heger, WT, van An del, TR, Sonké, B, Henry, AG. Comparing apples and  
872 pears: The hidden diversity of the Central African ~~Bush-bush Mangos-mangos~~  
873 (Irvingiaceae). ~~EconomieBotany~~. 2020; 74(2): 178-194. doi: 10.1007/s12231-020-09497-x.

874 ~~75.~~

875 ~~76.~~ ~~76.~~ Billong Fils PE, Afiong Nana N, Betti JL et al. Ethnobotanical survey of wild edible plants  
876 used by Baka people in southeastern Cameroon. ~~J Ethnobiol Ethnomed~~ 2020; 16:64 doi:  
877 ~~10.1186/s13002-020-00413-0.~~

878 ~~77.~~ Miranda TM, de Mello Amaro MC, Govone JS, Miranda DM. The influence of visual  
879 stimuli in ethnobotanical data collection using the listing task method. ~~Field Methods~~.  
880 ~~2007;19: 76–86. doi: 10.1177/ 1525822X06295987.~~ ~~Miranda TM, de Mello Amaro MC,~~  
881 ~~Govone JS, Miranda DM. The Influence of Visual Stimuli in Ethnobotanical Data Collection~~  
882 ~~Using the Listing Task Method. Field methods. 2007; 19: 76–86. doi: 10.1177/~~  
883 ~~1525822X06295987.~~

884 ~~78.~~

885 ~~7.~~ ~~77.~~ Ong HG, Kim YD. The role of wild edible plants in household food security among  
886 transitioning hunter-gatherers: evidence from the Philippines. ~~Food Security~~. 2017;9: 11–24.  
887 doi: 10.1007/s12571-016-0630-6.

888 ~~79.~~

889 ~~8.~~ ~~78.~~ Setalaphruk C, Price L. Children’s traditional ecological knowledge of wild food  
890 resources: a case study in a rural village in Northeast Thailand. ~~Journal of Ethnobiology and~~  
891 ~~Ethnomedicine~~. 2007;3(1): 33. doi: 10.1186/1746-4269-3-33.

892 ~~80.~~

Formatted: Font: (Default) Times New Roman, 12 pt

Formatted: Font: (Default) Times New Roman, 12 pt

Formatted: Font: (Default) Times New Roman, 12 pt

Formatted: List Paragraph, Indent: Left: 0", Hanging: 0.3",  
Numbered + Level: 1 + Numbering Style: 1, 2, 3, ... + Start  
at: 1 + Alignment: Left + Aligned at: 0.25" + Indent at:  
0.5", Tab stops: 0.1", Left

Formatted: Font: (Default) Times New Roman, 12 pt,  
English (United States)

Formatted: English (United States)

Formatted: Font: Not Italic

Formatted: English (United States)

Formatted: Font: Italic

Formatted: English (United States)

Formatted: English (United States)

Formatted: English (United States)

Formatted: No underline, Font color: Auto, English (United  
States)

Formatted: Font: (Default) Times New Roman, 12 pt, No  
underline, Font color: Auto

Formatted: Font: (Default) Times New Roman, 12 pt

Formatted: Normal, Indent: Left: -0.3"

Formatted: Font: (Default) Times New Roman, 12 pt, No  
underline, Font color: Auto

Formatted: Font: (Default) Times New Roman, 12 pt

Formatted: List Paragraph, Indent: Left: 0", Hanging: 0.3",  
Numbered + Level: 1 + Numbering Style: 1, 2, 3, ... + Start  
at: 1 + Alignment: Left + Aligned at: 0.25" + Indent at:  
0.5", Tab stops: 0.1", Left

Formatted: Font: (Default) Times New Roman, 12 pt, No  
underline, Font color: Auto

Formatted: Font: (Default) Times New Roman, 12 pt

Formatted: List Paragraph, Indent: Left: 0", Hanging: 0.3",  
Numbered + Level: 1 + Numbering Style: 1, 2, 3, ... + Start  
at: 1 + Alignment: Left + Aligned at: 0.25" + Indent at:  
0.5", Tab stops: 0.1", Left



893 9. ~~79~~. Crittenden AN, Conklin-Brittain NL, Marlowe FW, Schoeninger MJ, Wrangham R.  
894 Foraging strategies and diet composition of Hadza children. ~~American Journal of~~  
895 ~~Physical Anthropology~~. 2009;138(S48): 75–281. doi:10.1002/ajpa.21030.

Formatted: Font: (Default) Times New Roman, 12 pt, No underline, Font color: Auto

896 81. ~~80~~. Betti JL, Yongo OD, Mbomio DO, Iponga DM, Ngoye A. An ethnobotanical and floristical  
897 study of medicinal plants among the Baka Pygmies in the periphery of the Ipassa Biosphere  
898 reserve, Gabon. ~~European Journal of Medicinal Plants~~. 2013; 3(2): 174–205.  
899 doi:10.9734/EJMP/2013/2550.

Formatted: Font: (Default) Times New Roman, 12 pt

Formatted: List Paragraph, Indent: Left: 0", Hanging: 0.3", Numbered + Level: 1 + Numbering Style: 1, 2, 3, ... + Start at: 1 + Alignment: Left + Aligned at: 0.25" + Indent at: 0.5", Tab stops: 0.1", Left

Formatted: Font: (Default) Times New Roman, 12 pt, No underline, Font color: Auto

## 901 **Supplementary Material** Supporting information

902 **Supplementary Table 1. Wild edible plants reported during the walk-in-the-woods, free**  
903 **listing and dietary recalls in Le Bosquet and Kungu, southeast Cameroon.**

904  
905 Supplementary File 1. Data collection protocol for *ex-situ* interviews and *in-situ*  
906 interviews. WTH = acronym of collector Willem Thomas Heger; SG = Sandrine Gallois.  
907 Voucher specimens were deposited at the National Herbarium of Cameroon (YA) and Naturalis  
908 Biodiversity Center (L). \* only “tondo”, the general Baka term for *Aframomum* sp. was reported  
909 in the income survey. \*\* identifications based on Baka names and literature [2, 59, 80].

Formatted: Font: Italic, No underline, Font color: Auto

Formatted: Font: Italic, No underline, Font color: Auto

Formatted: Font: Bold

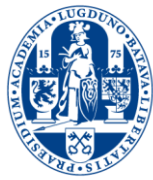

Universiteit  
Leiden

Error! Unknown document  
property name.  
**Leiden University, Leiden, the  
Netherlands**

Anna Fodor  
Academic Editor  
PLOS ONE

Leiden, 6 January, 2021

Dear Dr. Fodor,

Thank you for allowing us to adapt our manuscript PONE-D-20-37238, entitled “The importance of choosing appropriate methods for assessing wild food plant knowledge and use: a case study among the Baka in Cameroon”. We have followed your suggestions and hope that the manuscript now fits the submission standards of PLoS ONE.

We have submitted a revised version of our manuscript labeled as “revised manuscript with track changes” and a clean copy (unmarked) labeled as “manuscript”, as well as the response to the Editor's comments, Dr Muhammad Ishtiaq, in the document "Response to Reviewer" with a point by point answers.

Below, we list each point made by the academic editor, and our respective answer.

Additional Editor Comments:

Paper needs followings changes/improvements and data provisions; in order to proceed it for further.

(1) needs to improve English language, there are many mistakes in the article.(letter of English experts reviewed as supporting needed.

**Answer to comment #1:** Our manuscript was checked by someone with ample experience in publishing scientific articles in the English language.

(2) Letter of Ethical and ISE and other institution permission letters are required.

**Answer to comment #2:** The International Society for Ethnobiology does not issue permission letters and does not have an ethnical board: it just published standards for researchers, to which we adhered. However, our research was carried out within the ERC project “HARVEST: Plant Foods in Human Evolution; Factors affecting the harvest of nutrients from the floral environment”. For this research project, our co-author Amanda Henry received approval from the Ethical Board of the Faculty of Medicine of the University of Leipzig, Germany. We have added this letter to our submitted files and listed the HARVEST project in the funding. Moreover, before we started our fieldwork, we received permission from the National Committee of Ethics for the Research of Human Health (CNERSH) of the Cameroonian government. We also added this letter to the submitted files.

(3) The references cited in text and reference section needs to be rechecked as it has many mistakes in it.

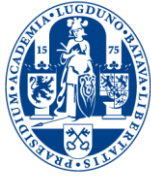

**Answer to comment #3:** We have checked all references in the text and reference list and adapted them to the style of PLoS ONE.

(4) Figure of study area needed.

**Answer to comment #4:** We included a map of the study area (Figure 1)

(5) Model of questionnaire needed.

**Answer to comment #5:** We included the model of our questionnaire in our Supporting Information (Supplementary file 1).

(6) Families names are not correct, recheck and resend table 1.

**Answer to comment #6:** Family and author names of the species are now listed in the Supporting Information (Supplementary Table 1). All scientific names were checked and updated using Plants of the World Online.

(7) Provide ubiquitous herbarium numbers for all plants collected. it has two types of numbering.

**Answer to comment #7:** Herbarium numbers for all plants collected are listed in Supplementary Table 1, but there are two acronyms (WTH and SG), referring to the two main collectors: Willem Thomas Heger and Sandrine Gallois. We had to follow the Naturalis guidelines of specimen collection for this study.

(8) Figures are dim/blurred, send high density/good quality figures.

**Answer to comment #8:** We have now uploaded high quality figures following the guidelines of PLoS ONE.

On behalf of our co-authors, we hope that our manuscript is now suitable to be considered for review,

Yours sincerely,

Sandrine Gallois and Tinde van Andel
